# Supplementary material for: Molecular basis of a high Hb A2/Hb Fβ-thalassemia trait: a retrospective analysis, genotype-phenotype interaction, diagnostic implication, and identification of a novel interaction withα-globin gene triplication
Source: PeerJ journal article supplement (doi:10.7717/peerj.15308), 2023-05-03
Supplement: GenBankOQ161123.pdf [file GenBankOQ161123.pdf]

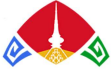

## GenBank OQ161123

gb-admin@ncbi.nlm.nih.gov <gb-admin@ncbi.nlm.nih.gov>  
 ถึง: kritsada.si@msu.ac.th

5 มกราคม 2566 เวลา 22:17

Dear GenBank Submitter:

Based on the data submitted to us, the scheduled release date for your submission is:

Jan 10, 2023

If this date is not correct, please let us know as soon as possible, otherwise this submission will be released on the date indicated above.

Changes may have been made to your original submission in order to conform to database annotation conventions. See the following for list of possible modifications: [https://ncbi.nlm.nih.gov/genbank/flatfile\\_changes/](https://ncbi.nlm.nih.gov/genbank/flatfile_changes/)

If you need to revise your record(s), follow these directions to format your update request: <https://www.ncbi.nlm.nih.gov/Genbank/update.html>

Send properly formatted updates to: [gb-admin@ncbi.nlm.nih.gov](mailto:gb-admin@ncbi.nlm.nih.gov)  
 Do not make a new submission for an update request.

Thank you for your submission, a contribution which will benefit the scientific community. We strongly recommend that these accession numbers appear in any publication which reports or discusses these data. The data are simultaneously made available to other INSDC databases, the European Nucleotide Archive (ENA) and the DNA Data Bank of Japan (DDBJ).

Please reply using the current Subject line.

Sincerely,

Erica Lam  
 GenBank Direct Submission Staff  
[gb-admin@ncbi.nlm.nih.gov](mailto:gb-admin@ncbi.nlm.nih.gov)

## GenBank flat file:

```

LOCUS OQ161123 495 bp DNA linear PRI 01-JAN-2023
DEFINITION UNVERIFIED: Homo sapiens sequence.
ACCESSION OQ161123
VERSION OQ161123
KEYWORDS UNVERIFIED.
SOURCE Homo sapiens (human)
ORGANISM Homo sapiens
  Eukaryota; Metazoa; Chordata; Craniata; Vertebrata; Euteleostomi;
  Mammalia; Eutheria; Euarchontoglires; Primates; Haplorrhini;
  Catarrhini; Hominidae; Homo.
REFERENCE 1 (bases 1 to 495)
AUTHORS Soontornpanawet,C., Singha,K., Srivorakun,H., Tepakhan,W.,
  Fucharoen,G. and Fucharoen,S.
TITLE Molecular basis of a high Hb A2 / Hb F beta-thalassemia trait with
  3.4 kb deletion (NG_000007.3:g.69825_73314del3488)
JOURNAL Unpublished
REFERENCE 2 (bases 1 to 495)
AUTHORS Soontornpanawet,C., Singha,K., Srivorakun,H., Tepakhan,W.,
  Fucharoen,G. and Fucharoen,S.
TITLE Direct Submission
JOURNAL Submitted (01-JAN-2023) Faculty of Medicine, Mahasarakham
  University, 11/20 Khamriang Sub-District, Kantarawichai, Maha
  Sarakham 44150, Thailand
COMMENT GenBank staff is unable to verify sequence and/or annotation
  provided by the submitter.
  LocalID: Seq1
  Bankit Comment: BankIt2658994
  Bankit Comment: LocalID:Seq1

##Assembly-Data-START##
Sequencing Technology :: Sanger dideoxy sequencing
##Assembly-Data-END##
FEATURES             Location/Qualifiers
   source             1..495
                     /organism="Homo sapiens"
                     /mol_type="genomic DNA"
                     /db_xref="taxon:9606"
BASE COUNT 219 a 77 c 70 g 129 t
ORIGIN
1 tccccagtta acctcctatt tgacaccact gattacccca ttgatagtc cactttgggt
61 tctaagtgc ttttatta ttgtattt tgactgcatt aagacaaaag aagaaaatc
121 taatttcac gttgcagccg tttttgat ttgatagag aagcaaaagg acaaaaagga
181 aaaaataaga agtgaggcct calcaaacca aaaaattcc acacaaaaaa caaaacaatg
241 aacaaatgaa agtgaaacca tgaatggca ttttgcaaa ccaaatatt citaatatt
301 ttggttaala tccaaatat ataagaaca cagatgatt aatacaaac aaaaaattaa
361 aatatggaaa ataaaaaat taaaaagaag aaaatcctgc catttatggc agaattgatg
421 aacctggagg atgtaaaact aagaaaata agcctgacac aaaaagacaa atacctacaca
481 acctgcaca tatgt
//

```
