# Supplementary material for: Molecular basis of a high Hb A2/Hb Fβ-thalassemia trait: a retrospective analysis, genotype-phenotype interaction, diagnostic implication, and identification of a novel interaction with α-globin gene triplication
Source: PeerJ. 2023 May 3;11:e15308. doi: 10.7717/peerj.15308 (PMC10163868; doi:10.7717/peerj.15308)
Supplement: Supplemental Information 1 [file peerj-11-15308-s001.xlsx]

## Sheet: Raw data Table 1 & Figure 4
No.	Groups	β-genotype	β-thal mutation	α-genotype	Sex	RBC (10^12/L)	Hb (g/dL)	Hct (%)	MCV (fL)	MCH (pg)	MCHC (g/dL)	RDW (%)	Hb A2 (%)	Hb F (%)	Hb E (%)
1-001	Pure β0-thalassemia trait	β0/βA	β CD 41/42 (-TTCT)	αα/αα	M	6.49	11.3	36.3	55.9	17.4	31	16.1	5.8	0.8	-
1-002	Pure β0-thalassemia trait	β0/βA	β CD17 (A-T)	αα/αα	M	7.82	13.7	44.7	57.2	17.5	30.6	21	6.6	1.2	-
1-003	Pure β0-thalassemia trait	β0/βA	β CD17 (A-T)	αα/αα	M	6.96	12.4	40.3	57.9	17.8	30.8	15.7	6.9	0.5	-
1-004	Pure β0-thalassemia trait	β0/βA	β CD17 (A-T)	αα/αα	M	6.97	12.5	39.8	57.1	17.9	31.3	18.8	5.3	0.1	-
1-005	Pure β0-thalassemia trait	β0/βA	β CD17 (A-T)	αα/αα	M	6.68	12.1	38	56.9	18.1	31.8	-	-	-	-
1-006	Pure β0-thalassemia trait	β0/βA	β CD17 (A-T)	αα/αα	M	7.1	13	40.9	57.6	18.3	31.8	16.6	5.8	-	-
1-007	Pure β0-thalassemia trait	β0/βA	β CD 41/42 (-TTCT)	αα/αα	M	7.48	13.7	44.3	59.2	18.3	30.9	20.7	5.5	-	-
1-008	Pure β0-thalassemia trait	β0/βA	β CD17 (A-T)	αα/αα	M	6.31	11.6	35.6	56.4	18.4	32.6	19.4	5.7	-	-
1-009	Pure β0-thalassemia trait	β0/βA	β CD17 (A-T)	αα/αα	M	6.83	12.7	42.1	61.6	18.6	30.2	19	6.5	0.7	-
1-010	Pure β0-thalassemia trait	β0/βA	β CD 41/42 (-TTCT)	αα/αα	M	5.38	12.6	39.7	73.8	18.6	31.7	20.6	4.7	0.3	-
1-011	Pure β0-thalassemia trait	β0/βA	β CD 41/42 (-TTCT)	αα/αα	M	7	13	40.7	58.4	18.7	31.9	20.7	6.1	1.7	-
1-012	Pure β0-thalassemia trait	β0/βA	β CD17 (A-T)	αα/αα	M	6.62	12.4	38.7	58.5	18.7	32	19.5	5.2	-	-
1-013	Pure β0-thalassemia trait	β0/βA	β CD17 (A-T)	αα/αα	M	6.4	12	40.3	62.8	18.7	29.8	14.8	6.4	1.2	-
1-014	Pure β0-thalassemia trait	β0/βA	β CD17 (A-T)	αα/αα	M	7.02	13.3	39.4	56.1	18.9	33.8	20.2	5.3	2	-
1-015	Pure β0-thalassemia trait	β0/βA	β CD17 (A-T)	αα/αα	M	5.97	11.3	34.9	58.5	18.9	32.4	18.1	6.1	-	-
1-016	Pure β0-thalassemia trait	β0/βA	β CD17 (A-T)	αα/αα	M	6.83	12.9	40.2	58.9	18.9	32.1	18.1	5.9	0	-
1-017	Pure β0-thalassemia trait	β0/βA	β CD 41/42 (-TTCT)	αα/αα	M	6.43	12.1	38.8	60.3	18.9	31.2	17.4	6.4	0	-
1-018	Pure β0-thalassemia trait	β0/βA	β CD 41/42 (-TTCT)	αα/αα	M	6.75	12.8	40	59.3	19	32.1	14.1	5.5	0.8	-
1-019	Pure β0-thalassemia trait	β0/βA	β CD71/72 (+A)	αα/αα	M	5.82	11.1	35.4	60.7	19	31.3	17.8	5.6	1.2	-
1-020	Pure β0-thalassemia trait	β0/βA	β CD 41/42 (-TTCT)	αα/αα	M	5.9	11.2	35.9	60.8	19	31.2	15.5	5.3	2.2	-
1-021	Pure β0-thalassemia trait	β0/βA	β IVSI-1 (G-T)	αα/αα	M	6.86	13	41.8	61	19	31.1	20.5	4.8	-	-
1-022	Pure β0-thalassemia trait	β0/βA	β CD 41/42 (-TTCT)	αα/αα	M	6.4	12.1	39.5	61.6	19	30.7	17	5.6	1.7	-
1-023	Pure β0-thalassemia trait	β0/βA	β CD17 (A-T)	αα/αα	M	6.47	12.3	40	61.8	19	30.7	15.6	5.9	1.3	-
1-024	Pure β0-thalassemia trait	β0/βA	β CD17 (A-T)	αα/αα	M	6.48	12.4	39.3	60.6	19.1	31.6	18.8	5.4	-	-
1-025	Pure β0-thalassemia trait	β0/βA	β CD17 (A-T)	αα/αα	M	5.59	10.8	32.3	57.8	19.3	33.4	17.9	6.1	-	-
1-026	Pure β0-thalassemia trait	β0/βA	β CD 41/42 (-TTCT)	αα/αα	M	7.76	15	46.1	59.4	19.3	32.5	-	5.3	0.5	-
1-027	Pure β0-thalassemia trait	β0/βA	β CD 41/42 (-TTCT)	αα/αα	M	5.85	11.3	37.3	63.7	19.3	30.2	16.3	5.7	1	-
1-028	Pure β0-thalassemia trait	β0/βA	β CD17 (A-T)	αα/αα	M	6.85	13.3	41.2	60.1	19.4	32.3	20	5.3	0.8	-
1-029	Pure β0-thalassemia trait	β0/βA	β CD17 (A-T)	αα/αα	M	6.54	12.7	39.7	60.7	19.4	32	15.8	5.6	-	-
1-030	Pure β0-thalassemia trait	β0/βA	β CD 41/42 (-TTCT)	αα/αα	M	6.55	12.7	39.8	60.7	19.4	31.9	15.2	6.1	0.6	-
1-031	Pure β0-thalassemia trait	β0/βA	β CD 41/42 (-TTCT)	αα/αα	M	6.38	12.6	39	61.1	19.4	31.7	-	6.86	0.85	-
1-032	Pure β0-thalassemia trait	β0/βA	β CD71/72 (+A)	αα/αα	M	6.19	12	38.2	62	19.4	31.5	22.2	6.1	-	-
1-033	Pure β0-thalassemia trait	β0/βA	β CD 41/42 (-TTCT)	αα/αα	M	5.36	10.4	33.4	62.4	19.4	31.1	16.8	5.1	-	-
1-034	Pure β0-thalassemia trait	β0/βA	β CD17 (A-T)	αα/αα	M	6.35	12.3	40.6	63.9	19.4	30.3	15.5	6.2	0	-
1-035	Pure β0-thalassemia trait	β0/βA	β CD17 (A-T)	αα/αα	M	7.39	14.6	47.6	64.4	19.4	30	-	5.3	-	-
1-036	Pure β0-thalassemia trait	β0/βA	β CD17 (A-T)	αα/αα	M	6.92	13.5	38.8	56.1	19.5	34.8	20.1	5.7	-	-
1-037	Pure β0-thalassemia trait	β0/βA	β CD17 (A-T)	αα/αα	M	6.63	12.9	39.5	59.6	19.5	32.7	17.8	5.8	-	-
1-038	Pure β0-thalassemia trait	β0/βA	β CD 41/42 (-TTCT)	αα/αα	M	6.61	12.9	41.4	62.6	19.5	31.2	17.6	6	-	-
1-039	Pure β0-thalassemia trait	β0/βA	β CD 41/42 (-TTCT)	αα/αα	M	6.24	12.3	39.3	62.9	19.7	31.3	14.9	5.1	0	-
1-040	Pure β0-thalassemia trait	β0/βA	β CD17 (A-T)	αα/αα	M	6.79	13.4	42.9	63.1	19.7	31.2	16.3	5.1	1	-
1-041	Pure β0-thalassemia trait	β0/βA	β CD 41/42 (-TTCT)	αα/αα	M	6.4	12.5	38	59.4	19.8	33.3	-	5.5	0	-
1-042	Pure β0-thalassemia trait	β0/βA	β CD 41/42 (-TTCT)	αα/αα	M	6.52	12.9	39.9	61.2	19.8	32.3	18.6	5.5	1.9	-
1-043	Pure β0-thalassemia trait	β0/βA	β CD 41/42 (-TTCT)	αα/αα	M	6.57	13	40.2	61.2	19.8	32.3	18.4	4.5	0.5	-
1-044	Pure β0-thalassemia trait	β0/βA	β CD 41/42 (-TTCT)	αα/αα	M	7.31	14.3	49	67	19.8	29.5	-	5.8	-	-
1-045	Pure β0-thalassemia trait	β0/βA	β CD 41/42 (-TTCT)	αα/αα	M	6.22	12.4	39	63	19.9	31.7	18.1	4.8	-	-
1-046	Pure β0-thalassemia trait	β0/βA	β CD17 (A-T)	αα/αα	M	6.01	12	38.8	64.5	19.9	30.9	15.2	6.1	1.3	-
1-047	Pure β0-thalassemia trait	β0/βA	β CD 41/42 (-TTCT)	αα/αα	M	6.48	12.9	43.8	67.6	19.9	29.5	-	6.5	0.7	-
1-048	Pure β0-thalassemia trait	β0/βA	β CD 41/42 (-TTCT)	αα/αα	M	6.24	12.5	36	57.7	20	34.7	20.1	6.1	-	-
1-049	Pure β0-thalassemia trait	β0/βA	β CD 41/42 (-TTCT)	αα/αα	M	6.26	12.5	38.3	61.2	20	32.6	19.4	5.5	1.6	-
1-050	Pure β0-thalassemia trait	β0/βA	β CD 41/42 (-TTCT)	αα/αα	M	6.19	12.4	38	61.4	20	32.6	19.3	5.4	1.1	-
1-051	Pure β0-thalassemia trait	β0/βA	β CD 41/42 (-TTCT)	αα/αα	M	6.5	13	41	63.1	20	31.7	16	5.8	0.9	-
1-052	Pure β0-thalassemia trait	β0/βA	β CD 41/42 (-TTCT)	αα/αα	M	6.7	13.5	37.6	56.1	20.1	35.9	19.8	5.3	-	-
1-053	Pure β0-thalassemia trait	β0/βA	β CD 41/42 (-TTCT)	αα/αα	M	6.41	12.9	38.9	60.7	20.1	33.2	-	5.1	-	-
1-054	Pure β0-thalassemia trait	β0/βA	β CD17 (A-T)	αα/αα	M	6.78	13.6	42.6	62.8	20.1	31.9	15.2	6.1	-	-
1-055	Pure β0-thalassemia trait	β0/βA	β CD17 (A-T)	αα/αα	M	6.49	13.1	41.4	63.8	20.1	31.6	16.5	6.2	2.3	-
1-056	Pure β0-thalassemia trait	β0/βA	β CD17 (A-T)	αα/αα	M	5.83	11.7	37.3	64	20.1	31.3	15.1	5.5	0.9	-
1-057	Pure β0-thalassemia trait	β0/βA	β CD17 (A-T)	αα/αα	M	5.97	12	38.5	64.5	20.1	31.1	15.9	5.6	-	-
1-058	Pure β0-thalassemia trait	β0/βA	β CD 41/42 (-TTCT)	αα/αα	M	6.44	12.9	41.8	64.9	20.1	31	18.4	6.3	1.1	-
1-059	Pure β0-thalassemia trait	β0/βA	β CD 41/42 (-TTCT)	αα/αα	M	5.29	10.6	34.3	64.9	20.1	30.9	16.3	4.8	1.5	-
1-060	Pure β0-thalassemia trait	β0/βA	β CD 41/42 (-TTCT)	αα/αα	M	6.44	13	39.5	61.3	20.2	32.9	19.3	6	0.6	-
1-061	Pure β0-thalassemia trait	β0/βA	β CD 41/42 (-TTCT)	αα/αα	M	6.93	14	43.2	62.2	20.2	32.4	16	6.04	0.6	-
1-062	Pure β0-thalassemia trait	β0/βA	β CD 41/42 (-TTCT)	αα/αα	M	6.29	12.7	39.6	62.9	20.2	32.2	17.4	5.5	0.9	-
1-063	Pure β0-thalassemia trait	β0/βA	β CD 41/42 (-TTCT)	αα/αα	M	6	12.1	38.4	63.9	20.2	31.6	16.3	5.9	1.3	-
1-064	Pure β0-thalassemia trait	β0/βA	β CD 41/42 (-TTCT)	αα/αα	M	6.77	13.7	43.6	64.4	20.2	31.4	-	6.3	0.5	-
1-065	Pure β0-thalassemia trait	β0/βA	β CD17 (A-T)	αα/αα	M	5.84	11.8	37.9	64.8	20.2	31.1	15	5.7	1.3	-
1-066	Pure β0-thalassemia trait	β0/βA	β CD 41/42 (-TTCT)	αα/αα	M	5.57	11.3	37.3	67.7	20.2	29.9	15.8	5.1	3	-
1-067	Pure β0-thalassemia trait	β0/βA	β CD 41/42 (-TTCT)	αα/αα	M	6.26	12.7	39.9	63.7	20.3	31.8	16.2	5.9	0.6	-
1-068	Pure β0-thalassemia trait	β0/βA	β CD17 (A-T)	αα/αα	M	7.23	14.7	48.8	67.5	20.3	30.1	-	6.4	-	-
1-069	Pure β0-thalassemia trait	β0/βA	β IVSI-1 (G-T)	αα/αα	M	6.67	13.6	42.2	63.3	20.4	32.2	20.1	4.4	0.5	-
1-070	Pure β0-thalassemia trait	β0/βA	β CD 41/42 (-TTCT)	αα/αα	M	6.89	14.1	39.4	57.2	20.5	35.8	19.7	5.7	1.2	-
1-071	Pure β0-thalassemia trait	β0/βA	β CD 41/42 (-TTCT)	αα/αα	M	5.3	10.9	31.9	60.3	20.5	34.1	16.3	5.5	0.1	-
1-072	Pure β0-thalassemia trait	β0/βA	β CD 41/42 (-TTCT)	αα/αα	M	4.63	9.5	28	60.5	20.5	33.9	17.8	5.9	1.9	-
1-073	Pure β0-thalassemia trait	β0/βA	β CD71/72 (+A)	αα/αα	M	5.9	12.1	37.8	64.1	20.5	32	17.2	6.1	0.3	-
1-074	Pure β0-thalassemia trait	β0/βA	β CD17 (A-T)	αα/αα	M	6.22	12.8	41.3	66.3	20.5	31	17.1	5.3	0.9	-
1-075	Pure β0-thalassemia trait	β0/βA	β CD 41/42 (-TTCT)	αα/αα	M	5.61	11.6	34.2	61.1	20.6	33.9	16.2	6.1	1.1	-
1-076	Pure β0-thalassemia trait	β0/βA	β CD 41/42 (-TTCT)	αα/αα	M	6.6	13.6	41	62.1	20.6	33.2	19.7	4.2	-	-
1-077	Pure β0-thalassemia trait	β0/βA	β CD17 (A-T)	αα/αα	M	6.59	13.6	43.3	65.7	20.6	31.4	21.9	5.7	1.9	-
1-078	Pure β0-thalassemia trait	β0/βA	β CD17 (A-T)	αα/αα	M	5.45	11.2	36.1	66.2	20.6	31.6	16.4	5.8	-	-
1-079	Pure β0-thalassemia trait	β0/βA	β CD 41/42 (-TTCT)	αα/αα	M	6.35	13.1	42	67	20.6	-	-	6.4	0.7	-
1-080	Pure β0-thalassemia trait	β0/βA	β CD17 (A-T)	αα/αα	M	6.68	13.8	41.3	61.8	20.7	33.4	15.9	6	0.6	-
1-081	Pure β0-thalassemia trait	β0/βA	β CD 41/42 (-TTCT)	αα/αα	M	6.19	12.8	42.1	68	20.7	30.5	16.1	4.4	2	-
1-082	Pure β0-thalassemia trait	β0/βA	β CD17 (A-T)	αα/αα	M	6.45	13.4	40.2	62.3	20.8	33.3	20.3	5.4	0.6	-
1-083	Pure β0-thalassemia trait	β0/βA	β CD 41/42 (-TTCT)	αα/αα	M	7	14.6	43.8	62.3	20.8	33.3	20	6.3	-	-
1-084	Pure β0-thalassemia trait	β0/βA	β CD 41/42 (-TTCT)	αα/αα	M	5.84	12.1	38	65.1	20.8	31.9	16.4	6	-	-
1-085	Pure β0-thalassemia trait	β0/βA	β CD17 (A-T)	αα/αα	M	6.65	13.8	43.7	65.6	20.8	31.7	15.9	5.9	1.7	-
1-086	Pure β0-thalassemia trait	β0/βA	β CD17 (A-T)	αα/αα	M	5.93	12.4	37.8	63.7	20.9	32.8	19	5.5	-	-
1-087	Pure β0-thalassemia trait	β0/βA	β CD 41/42 (-TTCT)	αα/αα	M	6.63	13.9	42	63.3	21	33.1	18.9	5.5	0.5	-
1-088	Pure β0-thalassemia trait	β0/βA	β CD17 (A-T)	αα/αα	M	6.3	13.2	40.3	64	21	32.8	17.6	5.8	-	-
1-089	Pure β0-thalassemia trait	β0/βA	β CD 41/42 (-TTCT)	αα/αα	M	6.13	12.8	40.4	65.9	21	31.8	17	5.2	-	-
1-090	Pure β0-thalassemia trait	β0/βA	β IVSI-1 (G-T)	αα/αα	M	6.2	13	41.1	66.3	21	31.6	16.9	4.8	2.3	-
1-091	Pure β0-thalassemia trait	β0/βA	β IVSI-1 (G-T)	αα/αα	M	6.2	13	41.4	66.7	21	31.4	16	5.2	-	-
1-092	Pure β0-thalassemia trait	β0/βA	β IVSI-1 (G-T)	αα/αα	M	5.67	12	36.6	64.5	21.1	32.8	17.1	5	5.3	-
1-093	Pure β0-thalassemia trait	β0/βA	β CD 41/42 (-TTCT)	αα/αα	M	5.73	12.1	38.2	66.7	21.1	31.7	15.3	6.5	1.3	-
1-094	Pure β0-thalassemia trait	β0/βA	β CD 41/42 (-TTCT)	αα/αα	M	6.21	13.1	41.6	67	21.1	31.5	19	4.8	-	-
1-095	Pure β0-thalassemia trait	β0/βA	β CD 41/42 (-TTCT)	αα/αα	M	4.92	10.4	33.4	67.9	21.1	31.1	19.4	6.1	2.6	-
1-096	Pure β0-thalassemia trait	β0/βA	β CD17 (A-T)	αα/αα	M	6.37	13.5	43.6	68.4	21.2	31	14.3	4.8	-	-
1-097	Pure β0-thalassemia trait	β0/βA	β CD17 (A-T)	αα/αα	M	5.34	11.4	32.2	60.3	21.3	35.4	14.3	5.1	-	-
1-098	Pure β0-thalassemia trait	β0/βA	β CD 41/42 (-TTCT)	αα/αα	M	5.51	11.8	35.8	65	21.4	33	18.4	6.1	-	-
1-099	Pure β0-thalassemia trait	β0/βA	β CD 41/42 (-TTCT)	αα/αα	M	4.65	10	28	60.4	21.5	35.7	15.3	-	-	-
1-100	Pure β0-thalassemia trait	β0/βA	β CD 41/42 (-TTCT)	αα/αα	M	6.11	13.1	39.5	64.6	21.5	33.3	17	5.3	1.5	-
1-101	Pure β0-thalassemia trait	β0/βA	β CD 41/42 (-TTCT)	αα/αα	M	6.68	14.4	43.6	65.3	21.6	33	17.9	6.1	-	-
1-102	Pure β0-thalassemia trait	β0/βA	β CD 41/42 (-TTCT)	αα/αα	M	5.49	11.9	36.1	65.9	21.6	32.9	17.2	5.1	0.2	-
1-103	Pure β0-thalassemia trait	β0/βA	β CD 41/42 (-TTCT)	αα/αα	M	5.5	11.9	37	67.3	21.6	32.2	18.3	4.2	0.7	-
1-104	Pure β0-thalassemia trait	β0/βA	β CD 41/42 (-TTCT)	αα/αα	M	5.14	11.2	35	67.9	21.7	31.9	15.5	6	2.3	-
1-105	Pure β0-thalassemia trait	β0/βA	β CD17 (A-T)	αα/αα	M	5.87	12.9	40	68.1	21.8	32	-	5.6	0.5	-
1-106	Pure β0-thalassemia trait	β0/βA	β CD 41/42 (-TTCT)	αα/αα	M	6.29	13.7	43.1	68.4	21.8	31.8	15.4	5.3	0.8	-
1-107	Pure β0-thalassemia trait	β0/βA	β CD17 (A-T)	αα/αα	M	5.51	12.1	34.3	62.3	21.9	35.2	16.9	6.1	3	-
1-108	Pure β0-thalassemia trait	β0/βA	β CD 41/42 (-TTCT)	αα/αα	M	5.96	13.1	40.1	67.3	22	32.7	16.1	4.6	-	-
1-109	Pure β0-thalassemia trait	β0/βA	β CD 41/42 (-TTCT)	αα/αα	M	5.11	11.4	34.7	68	22.3	32.8	17.2	4.2	-	-
1-110	Pure β0-thalassemia trait	β0/βA	β CD 41/42 (-TTCT)	αα/αα	M	5.05	11.4	31.9	63.3	22.5	35.7	17.6	5.7	-	-
1-111	Pure β0-thalassemia trait	β0/βA	β CD17 (A-T)	αα/αα	M	5.75	13.3	35.4	61.6	23.1	37.5	16	4.9	0.5	-
1-112	Pure β0-thalassemia trait	β0/βA	β CD 41/42 (-TTCT)	αα/αα	M	5.41	12.5	34.5	63.8	23.1	36.2	16.5	5.1	1.4	-
1-113	Pure β0-thalassemia trait	β0/βA	β CD 41/42 (-TTCT)	αα/αα	M	5.92	13.8	35.7	60.4	23.3	38.6	14.3	6.3	0.5	-
1-114	Pure β0-thalassemia trait	β0/βA	β CD 41/42 (-TTCT)	αα/αα	M	-	-	-	71.1	24.2	34	-	6.5	-	-
1-115	Pure β0-thalassemia trait	β0/βA	β CD 41/42 (-TTCT)	αα/αα	M	4.87	11.9	34.9	71.6	24.4	-	-	5.2	0.5	-
1-116	Pure β0-thalassemia trait	β0/βA	β CD17 (A-T)	αα/αα	M	5.2	13.9	32.7	62.9	26.7	42.5	16.7	6.4	-	-
1-117	Pure β0-thalassemia trait	β0/βA	β CD 41/42 (-TTCT)	αα/αα	M	4.25	11.4	34	80	26.8	-	-	4.8	1.5	-
1-118	Pure β0-thalassemia trait	β0/βA	β CD17 (A-T)	αα/αα	M	3.46	9.3	25.2	72.8	26.9	36.9	15.3	7.2	0.5	-
1-119	Pure β0-thalassemia trait	β0/βA	β CD17 (A-T)	αα/αα	M	-	-	-	65.6	-	-	-	6.4	-	-
1-120	Pure β0-thalassemia trait	β0/βA	β CD 41/42 (-TTCT)	αα/αα	F	4.25	7.9	28.8	67.5	18.7	27.4	16.5	4.6	-	-
1-121	Pure β0-thalassemia trait	β0/βA	β CD17 (A-T)	αα/αα	F	4.41	7.4	26.3	59.7	16.7	28.1	16.5	6.7	0.9	-
1-122	Pure β0-thalassemia trait	β0/βA	β CD 41/42 (-TTCT)	αα/αα	F	4.48	9.7	30	67	17.9	31.3	16.5	5.6	0.4	-
1-123	Pure β0-thalassemia trait	β0/βA	β CD 41/42 (-TTCT)	αα/αα	F	5.87	10.9	31.4	53.4	18	33.8	22.9	4.7	0.1	-
1-124	Pure β0-thalassemia trait	β0/βA	β CD 41/42 (-TTCT)	αα/αα	F	6.7	12.2	38.2	57	18.2	31.9	15.2	4.9	-	-
1-125	Pure β0-thalassemia trait	β0/βA	β CD 41/42 (-TTCT)	αα/αα	F	5.51	10.1	31	56.3	18.3	32.6	17.2	5.5	1.3	-
1-126	Pure β0-thalassemia trait	β0/βA	β CD 41/42 (-TTCT)	αα/αα	F	5.7	10.4	35.2	61.8	18.3	29.7	16.5	6.1	3.5	-
1-127	Pure β0-thalassemia trait	β0/βA	β CD 41/42 (-TTCT)	αα/αα	F	4.95	9.1	29.8	60.2	18.4	31.7	16.7	6.2	2.1	-
1-128	Pure β0-thalassemia trait	β0/βA	β CD 41/42 (-TTCT)	αα/αα	F	5.75	10.6	33.4	58.1	18.4	-	-	5.7	-	-
1-129	Pure β0-thalassemia trait	β0/βA	β CD 41/42 (-TTCT)	αα/αα	F	5.25	9.7	30.3	57.7	18.5	32	17.4	5.7	0.5	-
1-130	Pure β0-thalassemia trait	β0/βA	β CD 41/42 (-TTCT)	αα/αα	F	5.76	10.7	34	59	18.5	31.6	-	6.4	1	-
1-131	Pure β0-thalassemia trait	β0/βA	β CD17 (A-T)	αα/αα	F	6.18	11.5	35.5	57.4	18.6	32.4	17.4	5.9	1.6	-
1-132	Pure β0-thalassemia trait	β0/βA	β CD 41/42 (-TTCT)	αα/αα	F	5.15	9.6	33	63	18.6	-	15.3	5.3	0.9	-
1-133	Pure β0-thalassemia trait	β0/βA	β CD 41/42 (-TTCT)	αα/αα	F	5.56	10.4	33	59.4	18.7	31.5	18.7	4.7	-	-
1-134	Pure β0-thalassemia trait	β0/βA	β IVSI-1 (G-T)	αα/αα	F	4.08	7.7	23.1	56.7	18.8	33.3	14.1	5.9	2.7	-
1-135	Pure β0-thalassemia trait	β0/βA	β CD17 (A-T)	αα/αα	F	5.3	9.9	31.4	59	18.8	31.7	20.8	6.2	-	-
1-136	Pure β0-thalassemia trait	β0/βA	β CD17 (A-T)	αα/αα	F	5.47	10.3	32.5	59.4	18.8	31.7	17.2	6.6	-	-
1-137	Pure β0-thalassemia trait	β0/βA	β CD17 (A-T)	αα/αα	F	4.99	9.4	30.3	60.7	18.8	31	16.2	5.9	1.6	-
1-138	Pure β0-thalassemia trait	β0/βA	β CD17 (A-T)	αα/αα	F	6.1	11.5	37.1	60.8	18.8	31	16.7	6.3	1.1	-
1-139	Pure β0-thalassemia trait	β0/βA	β CD 41/42 (-TTCT)	αα/αα	F	3.99	7.5	24.8	61.9	18.8	30.3	16.1	6.7	1	-
1-140	Pure β0-thalassemia trait	β0/βA	β CD 41/42 (-TTCT)	αα/αα	F	5.25	9.9	33.4	63.6	18.8	29.5	14.6	6	0.4	-
1-141	Pure β0-thalassemia trait	β0/βA	β CD17 (A-T)	αα/αα	F	5.41	10.2	33.8	62.5	18.9	30.2	14.7	5.9	4.4	-
1-142	Pure β0-thalassemia trait	β0/βA	β CD17 (A-T)	αα/αα	F	4.84	9.2	28.3	58.5	19	32.5	-	-	-	-
1-143	Pure β0-thalassemia trait	β0/βA	β CD 41/42 (-TTCT)	αα/αα	F	5.69	10.8	33.3	58.5	19	32.4	18.6	6	-	-
1-144	Pure β0-thalassemia trait	β0/βA	β CD17 (A-T)	αα/αα	F	4.73	9.2	28.4	60	19	32	16.2	6.2	1.9	-
1-145	Pure β0-thalassemia trait	β0/βA	β CD17 (A-T)	αα/αα	F	5.95	11.3	37.4	62.8	19	30.2	16	5.8	1.7	-
1-146	Pure β0-thalassemia trait	β0/βA	β CD 41/42 (-TTCT)	αα/αα	F	4.8	9.1	30.7	64	19	29.6	15.4	5.3	-	-
1-147	Pure β0-thalassemia trait	β0/βA	β CD 41/42 (-TTCT)	αα/αα	F	5.08	9.7	33	60	19.1	-	-	4.7	1	-
1-148	Pure β0-thalassemia trait	β0/βA	β CD17 (A-T)	αα/αα	F	5.56	10.6	32.5	58.5	19.1	32.6	18.7	-	-	-
1-149	Pure β0-thalassemia trait	β0/βA	β CD17 (A-T)	αα/αα	F	5.19	9.9	30.4	58.6	19.1	31.6	-	6	-	-
1-150	Pure β0-thalassemia trait	β0/βA	β CD 41/42 (-TTCT)	αα/αα	F	5.22	10	32.2	61.7	19.1	31	15.6	5.59	-	-
1-151	Pure β0-thalassemia trait	β0/βA	β CD 41/42 (-TTCT)	αα/αα	F	4.81	9.2	31	64.4	19.1	29.7	15.8	4.9	-	-
1-152	Pure β0-thalassemia trait	β0/βA	β CD17 (A-T)	αα/αα	F	4.98	9.6	29.4	59	19.3	-	-	6.6	1.7	-
1-153	Pure β0-thalassemia trait	β0/βA	β CD 41/42 (-TTCT)	αα/αα	F	5.18	10	31.6	61	19.3	31.6	17.9	-	-	-
1-154	Pure β0-thalassemia trait	β0/βA	β CD 41/42 (-TTCT)	αα/αα	F	5.1	9.9	31.3	61.3	19.3	31.5	15.3	5.4	0.6	-
1-155	Pure β0-thalassemia trait	β0/βA	β CD 41/42 (-TTCT)	αα/αα	F	5.04	9.7	31.8	63.1	19.3	30.5	16.2	4.9	3.3	-
1-156	Pure β0-thalassemia trait	β0/βA	β CD17 (A-T)	αα/αα	F	5.09	9.9	30	58.9	19.4	33	17.6	-	-	-
1-157	Pure β0-thalassemia trait	β0/βA	β CD 41/42 (-TTCT)	αα/αα	F	4.9	9.5	29	59.2	19.4	32.8	16.2	5.6	-	-
1-158	Pure β0-thalassemia trait	β0/βA	β CD 41/42 (-TTCT)	αα/αα	F	4.64	9	28.4	61	19.4	31.8	18	5.2	-	-
1-159	Pure β0-thalassemia trait	β0/βA	β CD 41/42 (-TTCT)	αα/αα	F	4.68	9.1	28.8	61.5	19.4	31.6	17.1	5.9	-	-
1-160	Pure β0-thalassemia trait	β0/βA	β CD17 (A-T)	αα/αα	F	4.07	7.9	25	61	19.4	-	-	5.5	1.1	-
1-161	Pure β0-thalassemia trait	β0/βA	β CD71/72 (+A)	αα/αα	F	5.28	10.3	31.1	58.9	19.5	33.1	17	7.2	-	-
1-162	Pure β0-thalassemia trait	β0/βA	β CD17 (A-T)	αα/αα	F	5	9.7	31	62.1	19.5	31.3	16.4	5.5	0.7	-
1-163	Pure β0-thalassemia trait	β0/βA	β CD17 (A-T)	αα/αα	F	5.21	10.2	30.6	58.7	19.6	-	-	7.2	2.1	-
1-164	Pure β0-thalassemia trait	β0/βA	β CD 41/42 (-TTCT)	αα/αα	F	4.48	8.8	27.1	60.5	19.6	32.5	16.5	5.6	-	-
1-165	Pure β0-thalassemia trait	β0/βA	β CD 41/42 (-TTCT)	αα/αα	F	5.41	10.6	32.9	60.8	19.6	32.2	17.8	5.6	-	-
1-166	Pure β0-thalassemia trait	β0/βA	β CD 41/42 (-TTCT)	αα/αα	F	4.72	9.3	27.3	57.8	19.7	34.1	17.2	-	-	-
1-167	Pure β0-thalassemia trait	β0/βA	β CD 41/42 (-TTCT)	αα/αα	F	5.51	11.1	32.5	58.1	19.7	33.8	-	4.6	0.2	-
1-168	Pure β0-thalassemia trait	β0/βA	β CD 41/42 (-TTCT)	αα/αα	F	4.82	9.5	30.6	63.5	19.7	31	16.5	4.7	1.4	-
1-169	Pure β0-thalassemia trait	β0/βA	β CD 41/42 (-TTCT)	αα/αα	F	5.07	10	32.2	63.5	19.7	31.1	15.7	5.2	1.1	-
1-170	Pure β0-thalassemia trait	β0/βA	β CD17 (A-T)	αα/αα	F	4.48	8.8	28.6	64	19.7	30.8	20.6	4.6	-	-
1-171	Pure β0-thalassemia trait	β0/βA	β CD71/72 (+A)	αα/αα	F	4.83	9.5	30.9	64	19.7	30.7	18	5.6	1.7	-
1-172	Pure β0-thalassemia trait	β0/βA	β CD17 (A-T)	αα/αα	F	4.69	9.3	28.6	61	19.8	32.5	17.1	6.6	1.2	-
1-173	Pure β0-thalassemia trait	β0/βA	β CD17 (A-T)	αα/αα	F	5.3	10.5	32.9	62.1	19.8	31.9	16.6	5.5	1.3	-
1-174	Pure β0-thalassemia trait	β0/βA	β CD 41/42 (-TTCT)	αα/αα	F	5.05	10	32.3	63.8	19.8	31	15.3	6.8	1.6	-
1-175	Pure β0-thalassemia trait	β0/βA	β CD17 (A-T)	αα/αα	F	5.02	10	32	64	19.8	31.1	18	6.2	-	-
1-176	Pure β0-thalassemia trait	β0/βA	β CD 41/42 (-TTCT)	αα/αα	F	4.63	9.2	30.5	65.7	19.8	38.1	16.1	6	1.3	-
1-177	Pure β0-thalassemia trait	β0/βA	β CD 41/42 (-TTCT)	αα/αα	F	4.94	9.8	31	62.7	19.8	-	-	5.8	1.5	-
1-178	Pure β0-thalassemia trait	β0/βA	β CD17 (A-T)	αα/αα	F	5.37	10.7	32.6	60.7	19.9	32.8	16.3	5.5	-	-
1-179	Pure β0-thalassemia trait	β0/βA	β CD 41/42 (-TTCT)	αα/αα	F	5.28	10.5	33	61.7	19.9	32.2	18.4	7	3.5	-
1-180	Pure β0-thalassemia trait	β0/βA	β CD17 (A-T)	αα/αα	F	4.85	9.7	31	63.9	19.9	31.2	-	5.9	0.5	-
1-181	Pure β0-thalassemia trait	β0/βA	β CD 41/42 (-TTCT)	αα/αα	F	4.43	8.8	28.3	63.9	19.9	31.1	18.1	5.5	-	-
1-182	Pure β0-thalassemia trait	β0/βA	β CD71/72 (+A)	αα/αα	F	4.9	9.7	32.5	66.1	19.9	30	16.4	-	-	-
1-183	Pure β0-thalassemia trait	β0/βA	β CD 41/42 (-TTCT)	αα/αα	F	4.68	9.3	32.7	69.9	19.9	28.4	18.9	5.7	-	-
1-184	Pure β0-thalassemia trait	β0/βA	β CD 41/42 (-TTCT)	αα/αα	F	4.7	9.4	29	61	20	-	-	7.4	1.4	-
1-185	Pure β0-thalassemia trait	β0/βA	β CD 41/42 (-TTCT)	αα/αα	F	4.23	8.5	25.9	61.3	20	32.8	15.1	5.1	0.6	-
1-186	Pure β0-thalassemia trait	β0/βA	β IVSI-1 (G-T)	αα/αα	F	4.26	8.5	26.5	62.2	20	32.1	21.6	5.1	-	-
1-187	Pure β0-thalassemia trait	β0/βA	β CD 41/42 (-TTCT)	αα/αα	F	5.28	10.5	34.6	65.5	20	30.5	15.1	6	1.7	-
1-188	Pure β0-thalassemia trait	β0/βA	β CD17 (A-T)	αα/αα	F	5.2	10.4	34.4	66	20	30.3	16.2	6.4	2.6	-
1-189	Pure β0-thalassemia trait	β0/βA	β CD17 (A-T)	αα/αα	F	4.16	8.4	24	57.7	20.1	35	14.9	5.1	0.5	-
1-190	Pure β0-thalassemia trait	β0/βA	β CD 41/42 (-TTCT)	αα/αα	F	4.37	8.8	27.4	62.7	20.1	32.1	15.9	6.3	1.1	-
1-191	Pure β0-thalassemia trait	β0/βA	β CD 41/42 (-TTCT)	αα/αα	F	5.03	10.1	31.8	63.2	20.1	31.8	16.7	6.5	-	-
1-192	Pure β0-thalassemia trait	β0/βA	β CD17 (A-T)	αα/αα	F	4.87	9.9	31	63.6	20.1	31.6	-	6.6	2	-
1-193	Pure β0-thalassemia trait	β0/βA	β CD 41/42 (-TTCT)	αα/αα	F	5.05	10.1	33.5	66.2	20.1	30.2	14.2	6.3	2.4	-
1-194	Pure β0-thalassemia trait	β0/βA	β CD71/72 (+A)	αα/αα	F	4.77	9.6	31.8	66.7	20.1	30.1	15	5.8	1.1	-
1-195	Pure β0-thalassemia trait	β0/βA	β CD17 (A-T)	αα/αα	F	5.55	11.1	37.2	67.3	20.1	29.8	18.6	4.7	-	-
1-196	Pure β0-thalassemia trait	β0/βA	β CD 41/42 (-TTCT)	αα/αα	F	4.66	9.4	30	65	20.2	-	16.5	5.3	2.2	-
1-197	Pure β0-thalassemia trait	β0/βA	β CD17 (A-T)	αα/αα	F	4.66	9.4	32	69	20.2	-	-	6	2.6	-
1-198	Pure β0-thalassemia trait	β0/βA	β CD 41/42 (-TTCT)	αα/αα	F	5.25	10.6	32.4	61.7	20.2	32.7	18.2	4.6	0.5	-
1-199	Pure β0-thalassemia trait	β0/βA	β CD 41/42 (-TTCT)	αα/αα	F	4.75	9.6	30.2	63.6	20.2	31.8	16.9	5.71	-	-
1-200	Pure β0-thalassemia trait	β0/βA	β CD17 (A-T)	αα/αα	F	5.41	10.9	34.5	63.8	20.2	31.6	17.9	5.7	1.1	-
1-201	Pure β0-thalassemia trait	β0/βA	β CD 41/42 (-TTCT)	αα/αα	F	5.05	10.2	32.3	64	20.2	31.6	15.2	5.8	0.5	-
1-202	Pure β0-thalassemia trait	β0/βA	β CD 41/42 (-TTCT)	αα/αα	F	4.71	9.5	30.9	65.6	20.2	30.7	15.3	5.8	0.5	-
1-203	Pure β0-thalassemia trait	β0/βA	β CD17 (A-T)	αα/αα	F	5.4	11	32	59.3	20.4	34.5	-	5.4	1.5	-
1-204	Pure β0-thalassemia trait	β0/βA	β CD17 (A-T)	αα/αα	F	5.73	11	34	59.3	20.4	34.5	-	5.4	1.5	-
1-205	Pure β0-thalassemia trait	β0/βA	β CD 41/42 (-TTCT)	αα/αα	F	5.5	11.2	33.6	61.1	20.4	33.3	17	5.1	0.6	-
1-206	Pure β0-thalassemia trait	β0/βA	β CD 41/42 (-TTCT)	αα/αα	F	4.5	9.2	28.3	62.9	20.4	32.5	16.6	5.2	-	-
1-207	Pure β0-thalassemia trait	β0/βA	β CD17 (A-T)	αα/αα	F	4.8	9.8	30.4	63.3	20.4	32.1	16.1	4.8	0.7	-
1-208	Pure β0-thalassemia trait	β0/βA	β CD 41/42 (-TTCT)	αα/αα	F	4.86	9.9	31.3	64.4	20.4	31.6	15.9	4.7	1.3	-
1-209	Pure β0-thalassemia trait	β0/βA	β CD 41/42 (-TTCT)	αα/αα	F	4.82	9.9	31.9	66.1	20.4	30.9	14.6	5.4	0	-
1-210	Pure β0-thalassemia trait	β0/βA	β CD 41/42 (-TTCT)	αα/αα	F	5.11	10.5	32.3	63.2	20.5	32.5	18.3	5.2	-	-
1-211	Pure β0-thalassemia trait	β0/βA	β CD17 (A-T)	αα/αα	F	5.16	10.6	34.5	66.9	20.5	30.7	15.2	5.7	0.3	-
1-212	Pure β0-thalassemia trait	β0/βA	β CD 41/42 (-TTCT)	αα/αα	F	5.56	11.4	37.4	67.2	20.5	30.5	15.2	5.4	0.8	-
1-213	Pure β0-thalassemia trait	β0/βA	β CD17 (A-T)	αα/αα	F	4.92	10.1	31	63	20.5	-	-	6	-	-
1-214	Pure β0-thalassemia trait	β0/βA	β CD 41/42 (-TTCT)	αα/αα	F	3.73	7.7	23.8	63.9	20.6	32.3	16.5	5.2	2.5	-
1-215	Pure β0-thalassemia trait	β0/βA	β CD17 (A-T)	αα/αα	F	5.61	11.6	36.1	64.2	20.6	32.1	16.6	6.4	3	-
1-216	Pure β0-thalassemia trait	β0/βA	β CD 41/42 (-TTCT)	αα/αα	F	4.9	10.1	32.9	67.1	20.6	30.7	-	7.2	0.9	-
1-217	Pure β0-thalassemia trait	β0/βA	β CD 41/42 (-TTCT)	αα/αα	F	4.96	10.1	33	66.5	20.7	31.1	18	5.7	3.8	-
1-218	Pure β0-thalassemia trait	β0/βA	β CD 41/42 (-TTCT)	αα/αα	F	5.2	10.8	33.2	62.8	20.8	32.5	15.9	6	0.8	-
1-219	Pure β0-thalassemia trait	β0/βA	β CD 41/42 (-TTCT)	αα/αα	F	5.38	11.2	35	65	20.8	-	-	6.3	0.5	-
1-220	Pure β0-thalassemia trait	β0/βA	β CD17 (A-T)	αα/αα	F	4	8.3	27.6	69	20.8	30.1	13.9	5.9	-	-
1-221	Pure β0-thalassemia trait	β0/βA	β CD 41/42 (-TTCT)	αα/αα	F	4.73	9.9	27.6	58.4	20.9	35.9	21.9	7	-	-
1-222	Pure β0-thalassemia trait	β0/βA	β CD 41/42 (-TTCT)	αα/αα	F	3.92	8.2	23.2	59.2	20.9	35.3	17.3	5.9	-	-
1-223	Pure β0-thalassemia trait	β0/βA	β CD17 (A-T)	αα/αα	F	5.41	11.3	34.8	64.1	20.9	32.6	15.7	6.2	2.1	-
1-224	Pure β0-thalassemia trait	β0/βA	β CD 41/42 (-TTCT)	αα/αα	F	5.64	11.8	37.1	65.8	20.9	31.7	17	5.7	0.7	-
1-225	Pure β0-thalassemia trait	β0/βA	β CD 41/42 (-TTCT)	αα/αα	F	4.93	10.3	33.8	68.6	20.9	30.5	16.2	5.8	1.1	-
1-226	Pure β0-thalassemia trait	β0/βA	β CD 41/42 (-TTCT)	αα/αα	F	4.58	9.6	29.8	65	21	-	-	5.4	-	-
1-227	Pure β0-thalassemia trait	β0/βA	β CD71/72 (+A)	αα/αα	F	4.6	9.6	29	63	21	-	-	4.4	0.5	-
1-228	Pure β0-thalassemia trait	β0/βA	β CD 41/42 (-TTCT)	αα/αα	F	5	10.5	32.1	64.2	21	32.7	19.3	-	-	-
1-229	Pure β0-thalassemia trait	β0/βA	β CD17 (A-T)	αα/αα	F	4.85	10.2	31.9	65.7	21	31.9	14.5	-	-	-
1-230	Pure β0-thalassemia trait	β0/βA	β CD 41/42 (-TTCT)	αα/αα	F	5.28	11	35.2	66.7	21	31.4	15.8	5.9	5	-
1-231	Pure β0-thalassemia trait	β0/βA	β CD 41/42 (-TTCT)	αα/αα	F	4.6	9.8	29.7	64.4	21.3	33	-	5.8	1	-
1-232	Pure β0-thalassemia trait	β0/βA	β CD71/72 (+A)	αα/αα	F	5.18	11.1	32.9	63.5	21.4	33.7	17.7	5.3	-	-
1-233	Pure β0-thalassemia trait	β0/βA	β CD17 (A-T)	αα/αα	F	5.34	10.7	35	65.5	21.5	32.8	-	6.32	0.6	-
1-234	Pure β0-thalassemia trait	β0/βA	β CD 41/42 (-TTCT)	αα/αα	F	4.66	10	30.7	65.9	21.5	32.6	15.6	5.3	-	-
1-235	Pure β0-thalassemia trait	β0/βA	β CD17 (A-T)	αα/αα	F	5.7	10.9	34.9	68.8	21.5	31.2	-	5.2	-	-
1-236	Pure β0-thalassemia trait	β0/βA	β CD17 (A-T)	αα/αα	F	4.63	10	30.1	65	21.6	33.2	17.6	5.6		-
1-237	Pure β0-thalassemia trait	β0/βA	β CD17 (A-T)	αα/αα	F	4.57	9.9	31.2	68.2	21.6	31.6	15.7	4.6	1.3	-
1-238	Pure β0-thalassemia trait	β0/βA	β CD 41/42 (-TTCT)	αα/αα	F	3.81	11	24	63	21.7	32	-	5.9	-	-
1-239	Pure β0-thalassemia trait	β0/βA	β CD 41/42 (-TTCT)	αα/αα	F	4.52	9.8	30.5	67	21.7	32.1	20.8	5.8	-	-
1-240	Pure β0-thalassemia trait	β0/βA	β CD71/72 (+A)	αα/αα	F	4.99	10.9	30.8	61.7	21.8	35.4	14.7	5.7	-	-
1-241	Pure β0-thalassemia trait	β0/βA	β CD17 (A-T)	αα/αα	F	5.8	12.6	38	65.5	21.8	33.3	14.9	6.4	2.6	-
1-242	Pure β0-thalassemia trait	β0/βA	β CD17 (A-T)	αα/αα	F	5.21	11.4	32.6	62.6	21.9	35	14.2	6.1	3.3	-
1-243	Pure β0-thalassemia trait	β0/βA	β CD 41/42 (-TTCT)	αα/αα	F	5.54	12.2	40.3	72.6	22	30.3	16.1	6.1	0.7	-
1-244	Pure β0-thalassemia trait	β0/βA	β CD17 (A-T)	αα/αα	F	4.68	10.3	31	67	22	-	-	6.2	2.3	-
1-245	Pure β0-thalassemia trait	β0/βA	β CD 41/42 (-TTCT)	αα/αα	F	4.35	9.6	30	69	22.1	32	17.6	5.8	2.9	-
1-246	Pure β0-thalassemia trait	β0/βA	β CD 41/42 (-TTCT)	αα/αα	F	4.09	9.1	25.2	61.7	22.2	36.1	17	5.7	-	-
1-247	Pure β0-thalassemia trait	β0/βA	β CD 41/42 (-TTCT)	αα/αα	F	3.56	7.9	23.6	66.3	22.2	33.5	16.5	5.9	1.2	-
1-248	Pure β0-thalassemia trait	β0/βA	β CD 41/42 (-TTCT)	αα/αα	F	5.23	11.7	37.1	70.9	22.4	31.6	16.3	5.8	2	-
1-249	Pure β0-thalassemia trait	β0/βA	β CD 41/42 (-TTCT)	αα/αα	F	4.22	9.5	28.2	67	22.5	33.6	15	5.4	4	-
1-250	Pure β0-thalassemia trait	β0/βA	β CD 41/42 (-TTCT)	αα/αα	F	4.78	10.9	29.2	61.2	22.8	37.3	17.1	5.6	-	-
1-251	Pure β0-thalassemia trait	β0/βA	β CD17 (A-T)	αα/αα	F	4.35	9.9	30.5	70.1	22.9	32.6	15.4	4.9	1.6	-
1-252	Pure β0-thalassemia trait	β0/βA	β CD 41/42 (-TTCT)	αα/αα	F	4.99	11.6	35.6	71.4	23.2	32.5	15.4	6.5	0.7	-
1-253	Pure β0-thalassemia trait	β0/βA	β CD 41/42 (-TTCT)	αα/αα	F	-	-	-	60.8	-	-	-	6.1	-	-
1-254	Pure β0-thalassemia trait	β0/βA	β CD71/72 (+A)	αα/αα	F	-	-	-	62	-	-	-	6.2	-	-
1-255	Pure β0-thalassemia trait	β0/βA	β CD17 (A-T)	αα/αα	F	-	-	-	64	-	-	-	5.9	-	-
1-256	Pure β0-thalassemia trait	β0/βA	β CD 41/42 (-TTCT)	αα/αα	F	-	-	-	67	-	-	-	7.4	-	-
1-257	Pure β0-thalassemia trait	β0/βA	β CD 41/42 (-TTCT)	αα/αα	F	4.3	-	29	67.5	-	-	-	4.7	-	-
1-258	Pure β0-thalassemia trait	β0/βA	β CD71/72 (+A)	αα/αα	F	-	-	-	68.9	-	-	-	6.5	-	-
1-259	Pure β0-thalassemia trait	β0/βA	β CD 41/42 (-TTCT)	αα/αα	F	4	-	32	80	-	-	-	6.7	1.2	-
2-001	Pure β3.4-thalassemia trait	β3.4/βA	β 3.4 kb deletion	αα/αα	M	6.2	13.2	39.7	64	21.4	33.2	21.7	7	6.8	-
2-002	Pure β3.4-thalassemia trait	β3.4/βA	β 3.4 kb deletion	αα/αα	M	5.71	12	36	63	21	33.3	-	6.9	-	-
2-003	Pure β3.4-thalassemia trait	β3.4/βA	β 3.4 kb deletion	αα/αα	M	-	-	-	63.7	20.8	32.7	-	7.6	-	-
2-004	Pure β3.4-thalassemia trait	β3.4/βA	β 3.4 kb deletion	αα/αα	M	-	-	-	63.7	20.8	32.7	-	7.6	-	-
2-005	Pure β3.4-thalassemia trait	β3.4/βA	β 3.4 kb deletion	αα/αα	F	3.94	8.5	25.5	64.7	21.6	33.3	17.5	8.7	-	-
2-006	Pure β3.4-thalassemia trait	β3.4/βA	β 3.4 kb deletion	αα/αα	F	4.93	10	32	65.1	20.3	31.2	18.5	7.8	6.8	-
2-007	Pure β3.4-thalassemia trait	β3.4/βA	β 3.4 kb deletion	αα/αα	M	6.57	14.3	46	70	21.7	31.2	13.5	7	4.5	-
2-008	Pure β3.4-thalassemia trait	β3.4/βA	β 3.4 kb deletion	αα/αα	M	-	-	-	70	22	31.4	-	-	-	-
2-009	Pure β3.4-thalassemia trait	β3.4/βA	β 3.4 kb deletion	αα/αα	M	-	14.1	43	-	-	32.8	-	7.5	7	-
2-010	Pure β3.4-thalassemia trait	β3.4/βA	β 3.4 kb deletion	αα/αα	M	-	-	-	65.5	21.5	32.8	-	7.4	-	-
2-011	Pure β3.4-thalassemia trait	β3.4/βA	β 3.4 kb deletion	αα/αα	M	6.17	13.4	40.7	66	21.7	32.9	20.5	6.7	7.1	-
2-012	Pure β3.4-thalassemia trait	β3.4/βA	β 3.4 kb deletion	αα/αα	F	5.76	11.4	34	59	19.9	33.5	21.1	6.4	9.3	-
2-013	Pure β3.4-thalassemia trait	β3.4/βA	β 3.4 kb deletion	αα/αα	F	4.69	10.3	30.5	65	21.8	33.8	18.1	7.9	5.7	-
2-014	Pure β3.4-thalassemia trait	β3.4/βA	β 3.4 kb deletion	αα/αα	M	6.46	14.4	42	65	22.4	34.3	19.3	7	3.5	-
2-015	Pure β3.4-thalassemia trait	β3.4/βA	β 3.4 kb deletion	αα/αα	M	-	-	-	60	-	-	-	7.7	2	-
2-016	Pure β3.4-thalassemia trait	β3.4/βA	β 3.4 kb deletion	αα/αα	F	-	-	-	67	19.2	28.7	-	6.6	-	-
2-017	Pure β3.4-thalassemia trait	β3.4/βA	β 3.4 kb deletion	αα/αα	M	4.69	8.8	30	64	19	29.3	-	5.4	15.7	-
2-018	Pure β3.4-thalassemia trait	β3.4/βA	β 3.4 kb deletion	αα/αα	F	5.69	11.2	37.5	65.9	19.7	29.9	14.9	7.4	3	-
2-019	Pure β3.4-thalassemia trait	β3.4/βA	β 3.4 kb deletion	αα/αα	M	5.32	10.3	34.2	64.4	19.3	30	22.6	7.1	11.4	-
2-020	Pure β3.4-thalassemia trait	β3.4/βA	β 3.4 kb deletion	αα/αα	M	6.16	13.2	43.4	71	21.4	30.4	-	7.6	5.5	-
2-021	Pure β3.4-thalassemia trait	β3.4/βA	β 3.4 kb deletion	αα/αα	M	6.28	13.9	45.2	72	22.2	30.8	15	7	4.7	-
2-022	Pure β3.4-thalassemia trait	β3.4/βA	β 3.4 kb deletion	αα/αα	M	6.03	12.5	40.4	67	20.7	30.9	15.1	7.5	2.2	-
2-023	Pure β3.4-thalassemia trait	β3.4/βA	β 3.4 kb deletion	αα/αα	M	7.1	14	45	63.7	19.8	31	15.9	7.3	3.9	-
2-024	Pure β3.4-thalassemia trait	β3.4/βA	β 3.4 kb deletion	αα/αα	M	6.5	14	44.6	68.6	21.5	31.4	15.9	7.9	5.2	-
2-025	Pure β3.4-thalassemia trait	β3.4/βA	β 3.4 kb deletion	αα/αα	F	5.6	10.9	34.7	62	19.4	31.4	16.3	6.2	8	-
2-026	Pure β3.4-thalassemia trait	β3.4/βA	β 3.4 kb deletion	αα/αα	M	6.25	12.6	40	64	20.1	31.5	19.5	7.7	5.1	-
2-027	Pure β3.4-thalassemia trait	β3.4/βA	β 3.4 kb deletion	αα/αα	F	4.16	8.7	26.5	66.8	22	31.5	19	7.5	5.4	-
2-028	Pure β3.4-thalassemia trait	β3.4/βA	β 3.4 kb deletion	αα/αα	M	4.94	10.5	33.1	67	21.1	31.7	20	6.1	13.8	-
2-029	Pure β3.4-thalassemia trait	β3.4/βA	β 3.4 kb deletion	αα/αα	F	5.04	10.9	34.3	68	21.6	31.8	18.9	6.8	7.6	-
2-030	Pure β3.4-thalassemia trait	β3.4/βA	β 3.4 kb deletion	αα/αα	M	6.29	13.3	41.9	66	21.2	31.8	18.5	-	-	-
2-031	Pure β3.4-thalassemia trait	β3.4/βA	β 3.4 kb deletion	αα/αα	F	4.43	8.6	27	61	19.3	31.9	20.8	6.5	5.1	-
2-032	Pure β3.4-thalassemia trait	β3.4/βA	β 3.4 kb deletion	αα/αα	M	5.77	12.7	39.8	69	22	31.9	20.2	6.4	7.9	-
2-033	Pure β3.4-thalassemia trait	β3.4/βA	β 3.4 kb deletion	αα/αα	F	4.74	10.5	32.8	69	22	32	20	5.7	13.1	-
2-034	Pure β3.4-thalassemia trait	β3.4/βA	β 3.4 kb deletion	αα/αα	M	6.06	13	40.6	67	21.6	32	18	7.2	5.8	-
2-035	Pure β3.4-thalassemia trait	β3.4/βA	β 3.4 kb deletion	αα/αα	F	4.25	9.4	29.3	69	22.2	32.1	18.9	6.3	6.7	-
2-036	Pure β3.4-thalassemia trait	β3.4/βA	β 3.4 kb deletion	αα/αα	F	5.59	11	34.1	61	19.7	32.3	-	6.8	3.3	-
2-037	Pure β3.4-thalassemia trait	β3.4/βA	β 3.4 kb deletion	αα/αα	F	4.79	11	34	71	23.2	32.4	20.1	7.5	3.7	-
2-038	Pure β3.4-thalassemia trait	β3.4/βA	β 3.4 kb deletion	αα/αα	F	5.16	10.7	33	64	20.7	32.4	19.7	6.9	7.6	-
2-039	Pure β3.4-thalassemia trait	β3.4/βA	β 3.4 kb deletion	αα/αα	M	6.27	12.9	39.5	63	20.5	32.7	19.6	7.4	7	-
2-040	Pure β3.4-thalassemia trait	β3.4/βA	β 3.4 kb deletion	αα/αα	F	5.03	9.7	29.7	59	19.2	32.7	19.8	8	4.3	-
2-041	Pure β3.4-thalassemia trait	β3.4/βA	β 3.4 kb deletion	αα/αα	F	4.29	9.8	30	70	22.8	32.7	20.6	7.1	3.5	-
2-042	Pure β3.4-thalassemia trait	β3.4/βA	β 3.4 kb deletion	αα/αα	M	6.4	13.6	41.6	65	21.2	32.7	19.8	6.7	7.3	-
2-043	Pure β3.4-thalassemia trait	β3.4/βA	β 3.4 kb deletion	αα/αα	F	4.44	9	27.5	62	20.2	32.7	20.9	7.6	7.2	-
2-044	Pure β3.4-thalassemia trait	β3.4/βA	β 3.4 kb deletion	αα/αα	F	4.93	10.8	33	67	22	32.7	19.5	6.3	7.2	-
2-045	Pure β3.4-thalassemia trait	β3.4/βA	β 3.4 kb deletion	αα/αα	M	6.03	12.5	38	63	20.8	32.9	22.3	7.5	6.9	-
2-046	Pure β3.4-thalassemia trait	β3.4/βA	β 3.4 kb deletion	αα/αα	F	4.67	10.3	31.3	67	22	32.9	20.4	5.9	8.6	-
2-047	Pure β3.4-thalassemia trait	β3.4/βA	β 3.4 kb deletion	αα/αα	M	6.98	13.1	39.8	57	18.8	32.9	21.1	7.1	2.1	-
2-048	Pure β3.4-thalassemia trait	β3.4/βA	β 3.4 kb deletion	αα/αα	M	6.45	13.8	41.9	65	21.4	32.9	21.4	7	8.4	-
2-049	Pure β3.4-thalassemia trait	β3.4/βA	β 3.4 kb deletion	αα/αα	M	4.88	12.4	37.6	77	25.4	33	18.4	5.1	13.5	-
2-050	Pure β3.4-thalassemia trait	β3.4/βA	β 3.4 kb deletion	αα/αα	F	3.75	8.3	25.1	67	22.2	33.1	20.2	6.8	8.9	-
2-051	Pure β3.4-thalassemia trait	β3.4/βA	β 3.4 kb deletion	αα/αα	F	5.18	12.5	37.8	73	22.8	33.1	-	7.3	4.9	-
2-052	Pure β3.4-thalassemia trait	β3.4/βA	β 3.4 kb deletion	αα/αα	F	4.46	9.6	29	65	21.5	33.1	-	8.3	5.6	-
2-053	Pure β3.4-thalassemia trait	β3.4/βA	β 3.4 kb deletion	αα/αα	M	5.86	12.3	36.9	63	21	33.3	19.6	8.6	1	-
2-054	Pure β3.4-thalassemia trait	β3.4/βA	β 3.4 kb deletion	αα/αα	F	6.23	13.7	41.1	66	22	33.3	-	7.1	3.2	-
2-055	Pure β3.4-thalassemia trait	β3.4/βA	β 3.4 kb deletion	αα/αα	F	-	11	33	-	-	33.3	-	6.7	7.8	-
2-056	Pure β3.4-thalassemia trait	β3.4/βA	β 3.4 kb deletion	αα/αα	M	6.29	13.7	40.9	65	21.9	33.5	19.8	7.3	5.6	-
2-057	Pure β3.4-thalassemia trait	β3.4/βA	β 3.4 kb deletion	αα/αα	F	5.2	10.9	32.6	62.6	21	33.5	21.2	5.7	8.9	-
2-058	Pure β3.4-thalassemia trait	β3.4/βA	β 3.4 kb deletion	αα/αα	F	5.5	11.2	33	60	20.4	33.9	-	6.5	8.6	-
2-059	Pure β3.4-thalassemia trait	β3.4/βA	β 3.4 kb deletion	αα/αα	M	5.5	10.5	30.8	56	19.1	34.1	21.3	7.4	8.1	-
2-060	Pure β3.4-thalassemia trait	β3.4/βA	β 3.4 kb deletion	αα/αα	M	6.66	14.1	41.3	62	21.2	34.1	18.5	7.2	3.2	-
2-061	Pure β3.4-thalassemia trait	β3.4/βA	β 3.4 kb deletion	αα/αα	M	5.68	12.6	36.9	65	22.1	34.1	20.3	7	5.6	-
2-062	Pure β3.4-thalassemia trait	β3.4/βA	β 3.4 kb deletion	αα/αα	M	-	-	-	62.2	-	-	-	-	-	-
2-063	Pure β3.4-thalassemia trait	β3.4/βA	β 3.4 kb deletion	αα/αα	M	-	-	-	63	-	-	-	7.7	2.2	-
2-064	Pure β3.4-thalassemia trait	β3.4/βA	β 3.4 kb deletion	αα/αα	M	-	-	-	63	-	-	-	7.5	2	-
2-065	Pure β3.4-thalassemia trait	β3.4/βA	β 3.4 kb deletion	αα/αα	F	-	-	-	66.3	-	-	-	6.5	7.2	-
2-066	Pure β3.4-thalassemia trait	β3.4/βA	β 3.4 kb deletion	αα/αα	M	-	-	-	69	-	-	-	7.2	3.1	-
2-067	Pure β3.4-thalassemia trait	β3.4/βA	β 3.4 kb deletion	αα/αα	F	-	-	-	69	-	-	-	-	-	-
2-068	Pure β3.4-thalassemia trait	β3.4/βA	β 3.4 kb deletion	αα/αα	F	4.75	-	33	69.5	-	-	-	6.9	-	-
2-069	Pure β3.4-thalassemia trait	β3.4/βA	β 3.4 kb deletion	αα/αα	M	-	-	-	70	-	-	-	6.9	3.1	-
2-070	Pure β3.4-thalassemia trait	β3.4/βA	β 3.4 kb deletion	αα/αα	M	-	-	-	71	-	-	-	5.3	12.4	-
2-071	Pure β3.4-thalassemia trait	β3.4/βA	β 3.4 kb deletion	αα/αα	F	-	-	40	-	-	-	-	5.9	0.5	-
2-072	Pure β3.4-thalassemia trait	β3.4/βA	β 3.4 kb deletion	αα/αα	M	-	-	-	-	-	-	-	7.9	4.1	-
2-073	Pure β3.4-thalassemia trait	β3.4/βA	β 3.4 kb deletion	αα/αα	M	-	-	-	-	-	-	-	7.3	3.3	-
2-074	Pure β3.4-thalassemia trait	β3.4/βA	β 3.4 kb deletion	αα/αα	F	-	-	-	-	-	-	-	6.4	8.5	-
2-075	Pure β3.4-thalassemia trait	β3.4/βA	β 3.4 kb deletion	αα/αα	F	-	-	-	-	-	-	-	7.6	3.7	-
2-076	Pure β3.4-thalassemia trait	β3.4/βA	β 3.4 kb deletion	αα/αα	F	-	-	-	-	-	-	-	6.5	-	-
2-077	Pure β3.4-thalassemia trait	β3.4/βA	β 3.4 kb deletion	αα/αα	F	-	-	-	-	-	-	-	5.4	11	-
2-078	Pure β3.4-thalassemia trait	β3.4/βA	β 3.4 kb deletion	αα/αα	M	-	-	-	-	-	-	-	7.8	1.3	-
2-079	Pure β3.4-thalassemia trait	β3.4/βA	β 3.4 kb deletion	αα/αα	M	-	-	-	-	-	-	-	6.6	6.5	-
2-080	Pure β3.4-thalassemia trait	β3.4/βA	β 3.4 kb deletion	αα/αα	F	4.13	9.7	32.2	78	23.5	30.1	-	7.1	6.7	-
2-081	Pure β3.4-thalassemia trait	β3.4/βA	β 3.4 kb deletion	αα/αα	M	5.71	11.3	36	63	19.8	31.4	19	7.6	4.5	-
2-082	Pure β3.4-thalassemia trait	β3.4/βA	β 3.4 kb deletion	αα/αα	M	6.17	12.8	40.3	65.4	20.8	31.8	19.7	8.6	-	-
2-083	Pure β3.4-thalassemia trait	β3.4/βA	β 3.4 kb deletion	αα/αα	M	6.48	13.8	42.8	66	21.3	32.2	21.8	7.2	5.3	-
2-084	Pure β3.4-thalassemia trait	β3.4/βA	β 3.4 kb deletion	αα/αα	F	4.63	10.1	31	67	21.8	32.6	19.7	6.7	7.8	-
2-085	Pure β3.4-thalassemia trait	β3.4/βA	β 3.4 kb deletion	αα/αα	F	4.89	10.8	33	66.4	22.1	32.7	20.1	6.1	10.9	-
2-086	Pure β3.4-thalassemia trait	β3.4/βA	β 3.4 kb deletion	αα/αα	F	5.41	11.3	34	62.9	20.7	33.2	-	7.7	7.9	-
2-087	Pure β3.4-thalassemia trait	β3.4/βA	β 3.4 kb deletion	αα/αα	F	5.48	11.9	35.5	64.8	22.7	35	-	6.9	-	-
2-088	Pure β3.4-thalassemia trait	β3.4/βA	β 3.4 kb deletion	αα/αα	F	-	-	-	68	-	-	-	5.9	8.8	-
2-089	Pure β3.4-thalassemia trait	β3.4/βA	β 3.4 kb deletion	αα/αα	M	5.01	11.3	37.1	74	22.5	30.4	-	6.5	4.9	-
2-090	Pure β3.4-thalassemia trait	β3.4/βA	β 3.4 kb deletion	αα/αα	F	5.49	11.3	36.4	66.4	20.7	31.1	18.7	6.9	-	-
2-091	Pure β3.4-thalassemia trait	β3.4/βA	β 3.4 kb deletion	αα/αα	F	4.83	10.3	33	68.2	22.3	31.2	-	6.1	19	-
2-092	Pure β3.4-thalassemia trait	β3.4/βA	β 3.4 kb deletion	αα/αα	M	6.01	13.3	37.5	62.4	22.1	35.5	-	6.4	3.4	-
2-093	Pure β3.4-thalassemia trait	β3.4/βA	β 3.4 kb deletion	αα/αα	F	4.53	9.6	33.4	73.7	21.2	28.7	-	5.2	-	-
2-094	Pure β3.4-thalassemia trait	β3.4/βA	β 3.4 kb deletion	αα/αα	M	6.3	14.4	46.9	74.4	22.8	30.7	15.2	5.1	6.1	-
2-095	Pure β3.4-thalassemia trait	β3.4/βA	β 3.4 kb deletion	αα/αα	M	7.23	14.7	47	65	20	31	-	7.3	3.4	-
2-096	Pure β3.4-thalassemia trait	β3.4/βA	β 3.4 kb deletion	αα/αα	F	4.88	11.5	37	75	23.6	31.1	17.6	5.8	10.5	-
2-097	Pure β3.4-thalassemia trait	β3.4/βA	β 3.4 kb deletion	αα/αα	M	-	-	-	70.5	22	31.2	-	6.7	10.7	-
2-098	Pure β3.4-thalassemia trait	β3.4/βA	β 3.4 kb deletion	αα/αα	M	5.29	12.1	38.1	72	23	31.8	21.7	6.3	13.3	-
2-099	Pure β3.4-thalassemia trait	β3.4/βA	β 3.4 kb deletion	αα/αα	M	5.44	12.8	40	73.5	23.5	31.8	-	6	6.8	-
2-100	Pure β3.4-thalassemia trait	β3.4/βA	β 3.4 kb deletion	αα/αα	F	5	10.5	33	65.9	21.2	32.2	19.5	-	-	-
2-101	Pure β3.4-thalassemia trait	β3.4/βA	β 3.4 kb deletion	αα/αα	F	5.3	10.1	31	59.7	19.3	32.3	19.7	7.4	3.3	-
2-102	Pure β3.4-thalassemia trait	β3.4/βA	β 3.4 kb deletion	αα/αα	M	4.97	11.8	36.1	72.5	23.7	32.7	18.1	6.1	6.1	-
2-103	Pure β3.4-thalassemia trait	β3.4/βA	β 3.4 kb deletion	αα/αα	F	4.77	9.7	31	65	20.3	31.3	19.5	7.1	6.1	-
3-001	β0-thalassemia/Hb E	β0/βE	β CD 41/42 (-TTCT)/Hb E	αα/αα	M	-	-	22	56	16.3	29.4	-	51	-	-
3-002	β0-thalassemia/Hb E	β0/βE	β CD 41/42 (-TTCT)/Hb E	αα/αα	M	-	6.7	22	61.9	19.2	31	-	39	-	17.9
3-003	β0-thalassemia/Hb E	β0/βE	β CD 41/42 (-TTCT)/Hb E	αα/αα	M	3.74	8.3	24.2	64.7	22.2	34.3	-	48.1	-	51.9
3-004	β0-thalassemia/Hb E	β0/βE	β CD 41/42 (-TTCT)/Hb E	αα/αα	M	3.07	8.3	23.6	76.9	26.7	35.2	-	43.8	-	22.8
3-005	β0-thalassemia/Hb E	β0/βE	β CD 41/42 (-TTCT)/Hb E	αα/αα	M	2.5	5.3	16.5	65.5	21	32.1	31.6	51.8	-	50.2
3-006	β0-thalassemia/Hb E	β0/βE	β CD 41/42 (-TTCT)/Hb E	αα/αα	M	2.22	5.1	17	76.4	23	30.1	29.4	64.2	-	36.7
3-007	β0-thalassemia/Hb E	β0/βE	β CD17 (A-T)/Hb E	αα/αα	M	4.87	8.2	25.3	51.9	16.9	32.5	30.8	78.1	-	-
3-008	β0-thalassemia/Hb E	β0/βE	β CD17 (A-T)/Hb E	αα/αα	M	6.58	10.9	31	47.1	16.6	35.2	27.7	77.3	-	16.5
3-009	β0-thalassemia/Hb E	β0/βE	β CD17 (A-T)/Hb E	αα/αα	M	4.3	8.9	28.7	67	20.7	31.1	34.7	57.2	-	37.7
3-010	β0-thalassemia/Hb E	β0/βE	β CD 41/42 (-TTCT)/Hb E	αα/αα	M	3.56	8.5	26.5	74.4	23.9	32.1	25.1	37	-	49
3-011	β0-thalassemia/Hb E	β0/βE	β CD 41/42 (-TTCT)/Hb E	αα/αα	M	-	-	-	-	-	-	-	58.5	-	30.8
3-012	β0-thalassemia/Hb E	β0/βE	β CD17 (A-T)/Hb E	αα/αα	M	-	-	-	-	-	-	-	53.6	-	40.7
3-013	β0-thalassemia/Hb E	β0/βE	β CD71/72 (+A)/Hb E	αα/αα	M	3.29	7.5	22.6	68.7	22.8	33.2	-	39	-	41.6
3-014	β0-thalassemia/Hb E	β0/βE	β CD17 (A-T)/Hb E	αα/αα	M	2.31	5.3	17.6	76.2	22.9	30.1	30.1	-	-	-
3-015	β0-thalassemia/Hb E	β0/βE	β CD 41/42 (-TTCT)/Hb E	αα/αα	M	4.04	7.4	23.3	57.7	18.3	31.8	32.5	62.8	-	31.2
3-016	β0-thalassemia/Hb E	β0/βE	β CD17 (A-T)/Hb E	αα/αα	M	3.65	6.7	21.8	59.7	18.4	30.7	33.2	52	6	42
3-017	β0-thalassemia/Hb E	β0/βE	β CD17 (A-T)/Hb E	αα/αα	M	-	-	-	-	-	-	-	56	7.9	36.1
3-018	β0-thalassemia/Hb E	β0/βE	β CD 41/42 (-TTCT)/Hb E	αα/αα	M	-	-	-	-	-	-	-	40.7	4.7	54.6
3-019	β0-thalassemia/Hb E	β0/βE	β CD 41/42 (-TTCT)/Hb E	αα/αα	M	-	-	-	-	-	-	-	68.4	5.9	24.8
3-020	β0-thalassemia/Hb E	β0/βE	β CD 41/42 (-TTCT)/Hb E	αα/αα	M	4.7	8.5	25.3	53.8	18.1	33.6	34.4	46.7	6.8	46.5
3-021	β0-thalassemia/Hb E	β0/βE	β CD 41/42 (-TTCT)/Hb E	αα/αα	M	-	-	-	-	-	-	-	61.3	6.8	31.9
3-022	β0-thalassemia/Hb E	β0/βE	β CD 41/42 (-TTCT)/Hb E	αα/αα	M	4.04	7.4	23.3	57.7	18.3	31.8	32.5	61.1	7.7	31.2
3-023	β0-thalassemia/Hb E	β0/βE	β CD 41/42 (-TTCT)/Hb E	αα/αα	M	-	-	-	-	-	-	-	38.3	3.2	58.5
3-024	β0-thalassemia/Hb E	β0/βE	β CD17 (A-T)/Hb E	αα/αα	M	-	-	-	-	-	-	-	57.9	8.6	33.5
3-025	β0-thalassemia/Hb E	β0/βE	β CD 41/42 (-TTCT)/Hb E	αα/αα	M	5.14	8.7	27.3	54.1	16.9	31.3	30	73.7	8.4	17.6
3-026	β0-thalassemia/Hb E	β0/βE	β CD 41/42 (-TTCT)/Hb E	αα/αα	M	2.49	5.9	14	58	15.8		27.8	71	7.3	21.7
3-027	β0-thalassemia/Hb E	β0/βE	β CD71/72 (+A)/Hb E	αα/αα	M	-	-	-	-	-	-	-	40.3	3.1	56.4
3-028	β0-thalassemia/Hb E	β0/βE	β CD 41/42 (-TTCT)/Hb E	αα/αα	M	-	-	-	-	-	-	-	63	5.9	25.6
3-029	β0-thalassemia/Hb E	β0/βE	β CD 41/42 (-TTCT)/Hb E	αα/αα	M	-	-	-	54.8	-	-	-	73	7.5	19.5
3-030	β0-thalassemia/Hb E	β0/βE	β CD 41/42 (-TTCT)/Hb E	αα/αα	M	-	-	-	56	-	-	-	59.9	6.2	33.9
3-031	β0-thalassemia/Hb E	β0/βE	β CD 41/42 (-TTCT)/Hb E	αα/αα	M	-	9.7	27	44	15.7	35.4	-	74.1	8.6	15.4
3-032	β0-thalassemia/Hb E	β0/βE	β CD 41/42 (-TTCT)/Hb E	αα/αα	M	-	-	-	-	-	-	-	57.1	8.3	33.8
3-033	β0-thalassemia/Hb E	β0/βE	β IVSI-1 (G-T)/Hb E	αα/αα	M	4.07	7.3	28.9	71	17.9	25.3	30.5	72.2	8	19.8
3-034	β0-thalassemia/Hb E	β0/βE	β CD17 (A-T)/Hb E	αα/αα	M	-	-	-	-	-	-	-	51.9	5.7	40.1
3-035	β0-thalassemia/Hb E	β0/βE	β CD 41/42 (-TTCT)/Hb E	αα/αα	M	-	-	-	-	-	-	-	42.3	4.2	51.3
3-036	β0-thalassemia/Hb E	β0/βE	β CD 41/42 (-TTCT)/Hb E	αα/αα	M	-	-	-	-	-	-	-	68.2	5.2	25.6
3-037	β0-thalassemia/Hb E	β0/βE	β CD 41/42 (-TTCT)/Hb E	αα/αα	M	-	7.5	-	-	-	-	-	25.1	4.7	74.9
3-038	β0-thalassemia/Hb E	β0/βE	β CD 41/42 (-TTCT)/Hb E	αα/αα	M	-	-	-	-	-	-	-	79.8	7.6	20.2
3-039	β0-thalassemia/Hb E	β0/βE	β CD 41/42 (-TTCT)/Hb E	αα/αα	M	5.56	9.4	31.6	56.8	17	29.9	24.5	84.4	7.7	15.6
3-040	β0-thalassemia/Hb E	β0/βE	β CD 41/42 (-TTCT)/Hb E	αα/αα	M	-	-	-	-	-	-	-	51.1	5	48.9
3-041	β0-thalassemia/Hb E	β0/βE	β CD17 (A-T)/Hb E	αα/αα	M	5.63	11.4	36.6	65	20.2	31	23.8	38	4.4	62
3-042	β0-thalassemia/Hb E	β0/βE	β CD 41/42 (-TTCT)/Hb E	αα/αα	M	-	-	-	-	-	-	-	38.6	4.2	61.4
3-043	β0-thalassemia/Hb E	β0/βE	β CD 41/42 (-TTCT)/Hb E	αα/αα	M	-	10.8	35.5	57.1	17.3	30.4	-	93.5	9.3	6.5
3-044	β0-thalassemia/Hb E	β0/βE	β IVSI-1 (G-T)/Hb E	αα/αα	M	4.57	9.1	31	67	19.8	-	22.9	56.3	4.7	43.7
3-045	β0-thalassemia/Hb E	β0/βE	β CD 41/42 (-TTCT)/Hb E	αα/αα	M	-	-	-	-	-	-	-	72.7	6.5	27.3
3-046	β0-thalassemia/Hb E	β0/βE	β CD17 (A-T)/Hb E	αα/αα	M	-	8.5	25.5	64.7	21.6	33.3	-	54.2	4.4	45.8
3-047	β0-thalassemia/Hb E	β0/βE	β CD 41/42 (-TTCT)/Hb E	αα/αα	M	5.74	9.8	30.4	52.9	17.1	32.4	41.3	79.3	8.7	20.7
3-048	β0-thalassemia/Hb E	β0/βE	β CD 41/42 (-TTCT)/Hb E	αα/αα	M	-	-	-	-	-	-	-	73.6	6.7	26.4
3-049	β0-thalassemia/Hb E	β0/βE	β CD 41/42 (-TTCT)/Hb E	αα/αα	M	-	11.6	36.1	74.2	23.8	32.1	-	65.2	6.4	34.8
3-050	β0-thalassemia/Hb E	β0/βE	β CD 41/42 (-TTCT)/Hb E	αα/αα	M	-	-	-	-	-	-	-	53	5.1	47
3-051	β0-thalassemia/Hb E	β0/βE	β CD 41/42 (-TTCT)/Hb E	αα/αα	M	-	-	-	-	-	-	-	76.4	8.2	23.6
3-052	β0-thalassemia/Hb E	β0/βE	β CD 41/42 (-TTCT)/Hb E	αα/αα	M	4.64	8	25.3	54.4	17.3	-	35.2	87.7	8.9	12.3
3-053	β0-thalassemia/Hb E	β0/βE	β CD17 (A-T)/Hb E	αα/αα	M	6.23	10	33.5	53.8	16.1	30	34.4	79.9	10.4	20.1
3-054	β0-thalassemia/Hb E	β0/βE	β CD 41/42 (-TTCT)/Hb E	αα/αα	M	-	8.3	28	57.5	17.1	28.9	-	79.9	7.7	20.1
3-055	β0-thalassemia/Hb E	β0/βE	β CD 41/42 (-TTCT)/Hb E	αα/αα	M	-	-	-	-	-	-	-	79.6	7.3	20.4
3-056	β0-thalassemia/Hb E	β0/βE	β CD 41/42 (-TTCT)/Hb E	αα/αα	M	3.63	5.7	18.4	50.7	15.7	31	31.3	69.1	7.4	30.9
3-057	β0-thalassemia/Hb E	β0/βE	β CD17 (A-T)/Hb E	αα/αα	M	-	-	-	58	18	-	-	71.3	6.9	28.7
3-058	β0-thalassemia/Hb E	β0/βE	β CD71/72 (+A)/Hb E	αα/αα	M	5.32	8.9	30.3	56.9	16.7	29.3	32.4	83	6.7	17
3-059	β0-thalassemia/Hb E	β0/βE	β CD 41/42 (-TTCT)/Hb E	αα/αα	M	-	-	-	51.1	16.9	-	-	80.9	7.7	19.1
3-060	β0-thalassemia/Hb E	β0/βE	β CD 41/42 (-TTCT)/Hb E	αα/αα	M	-	9	32.5	52	14	-	-	90.5	9.6	9.5
3-061	β0-thalassemia/Hb E	β0/βE	β CD17 (A-T)/Hb E	αα/αα	F	4.87	-	31.8	65.8	22.6	34.3	24.9	49.2	-	-
3-062	β0-thalassemia/Hb E	β0/βE	β CD 41/42 (-TTCT)/Hb E	αα/αα	F	5.06	9.2	31	61.3	18.2	29.7	-	-	-	-
3-063	β0-thalassemia/Hb E	β0/βE	β CD 41/42 (-TTCT)/Hb E	αα/αα	F	3.44	7.7	24.5	71.2	22.4	31.4	-	42.5	-	54.9
3-064	β0-thalassemia/Hb E	β0/βE	β CD17 (A-T)/Hb E	αα/αα	F	-	6.1	20.9	66	-	-	-	47.5	-	-
3-065	β0-thalassemia/Hb E	β0/βE	β CD17 (A-T)/Hb E	αα/αα	F	2.18	5.5	18.9	76.6	25.3	29.2	34	-	-	-
3-066	β0-thalassemia/Hb E	β0/βE	β CD 41/42 (-TTCT)/Hb E	αα/αα	F	3.06	6.2	19.9	65	20.2	31	30.9	52	-	44
3-067	β0-thalassemia/Hb E	β0/βE	β CD17 (A-T)/Hb E	αα/αα	F	-	7.6	23.9	59	18.9	32	-	66.4	-	28.7
3-068	β0-thalassemia/Hb E	β0/βE	β CD17 (A-T)/Hb E	αα/αα	F	3.35	6.3	20.3	60.6	18.8	31	30.9	-	-	-
3-069	β0-thalassemia/Hb E	β0/βE	β CD 41/42 (-TTCT)/Hb E	αα/αα	F	4.01	8.3	26.6	66.4	20.7	31.1	29.8	60.6	-	34.4
3-070	β0-thalassemia/Hb E	β0/βE	β CD17 (A-T)/Hb E	αα/αα	F	4.69	7.7	22.6	48.2	16.4	34.1	27.9	72.1	-	22.4
3-071	β0-thalassemia/Hb E	β0/βE	β IVSI-1 (G-T)/Hb E	αα/αα	F	3.45	6.7	20.1	58.3	19.4	33.3	31.5	65.5	-	28.8
3-072	β0-thalassemia/Hb E	β0/βE	β CD 41/42 (-TTCT)/Hb E	αα/αα	F	3.82	9.2	26.6	69.6	24.1	34.6	26.1	49	-	47
3-073	β0-thalassemia/Hb E	β0/βE	β CD 41/42 (-TTCT)/Hb E	αα/αα	F	-	-	-	-	-	-	-	59.5	-	34.9
3-074	β0-thalassemia/Hb E	β0/βE	β CD 41/42 (-TTCT)/Hb E	αα/αα	F	-	8.6	26	55.7	18	-	28.9	-	-	-
3-075	β0-thalassemia/Hb E	β0/βE	β CD 41/42 (-TTCT)/Hb E	αα/αα	F	3.58	7.6	22.7	63.4	21.2	33.5	36.3	44.6	-	49.9
3-076	β0-thalassemia/Hb E	β0/βE	β CD 41/42 (-TTCT)/Hb E	αα/αα	F	3.74	7.8	25.3	67.7	21	30.9	29.9	48.5	-	45.4
3-077	β0-thalassemia/Hb E	β0/βE	β IVSI-1 (G-T)/Hb E	αα/αα	F	3.33	7.1	21	63.1	21.3	33.8	29	53	-	32.9
3-078	β0-thalassemia/Hb E	β0/βE	β CD 41/42 (-TTCT)/Hb E	αα/αα	F	4.34	7.7	23.1	53.2	17.7	33.3	28.9	76.2	-	20.9
3-079	β0-thalassemia/Hb E	β0/βE	β CD 41/42 (-TTCT)/Hb E	αα/αα	F	4.02	6.4	19.5	48.5	15.9	32.8	31.6	70.1	-	16.8
3-080	β0-thalassemia/Hb E	β0/βE	β CD 41/42 (-TTCT)/Hb E	αα/αα	F	2.97	5.6	19.2	73	18.9	29.2	29.3	67.7	-	43.3
3-081	β0-thalassemia/Hb E	β0/βE	β CD17 (A-T)/Hb E	αα/αα	F	4.42	9.2	30.2	68.4	20.9	30.6	30.5	35	3.3	61.2
3-082	β0-thalassemia/Hb E	β0/βE	β CD17 (A-T)/Hb E	αα/αα	F	-	7.5	24.5	69.4	22.1	30.6	-	30.6	3	64.1
3-083	β0-thalassemia/Hb E	β0/βE	β CD17 (A-T)/Hb E	αα/αα	F	-	-	-	58.5	-	-	-	70.3	7.6	22.1
3-084	β0-thalassemia/Hb E	β0/βE	β CD17 (A-T)/Hb E	αα/αα	F	-	9	30	57	16	-	-	66.1	7.2	26.7
3-085	β0-thalassemia/Hb E	β0/βE	β CD71/72 (+A)/Hb E	αα/αα	F	4.45	7.2	21.2	47.6	16.2	34	31.6	69.2	6.9	23.9
3-086	β0-thalassemia/Hb E	β0/βE	β CD 41/42 (-TTCT)/Hb E	αα/αα	F	3.74	7.8	25.3	67.7	21	30.9	29.9	45.3	5	49.7
3-087	β0-thalassemia/Hb E	β0/βE	β IVSI-1 (G-T)/Hb E	αα/αα	F	3.33	7.1	21	63.1	21.3	33.8	29	46.3	3.4	50.3
3-088	β0-thalassemia/Hb E	β0/βE	β CD 41/42 (-TTCT)/Hb E	αα/αα	F	2.97	5.6	19.2	73	18.9	29.2	29.3	51.1	5.5	43.4
3-089	β0-thalassemia/Hb E	β0/βE	β CD 41/42 (-TTCT)/Hb E	αα/αα	F	3.27	7.3	23.5	72	22.3	31.1	22.3	44.8	3.6	51.6
3-090	β0-thalassemia/Hb E	β0/βE	β CD 41/42 (-TTCT)/Hb E	αα/αα	F	-	-	25	-	-	-	-	48	5.6	46.4
3-091	β0-thalassemia/Hb E	β0/βE	β CD 41/42 (-TTCT)/Hb E	αα/αα	F	3.05	6.8	21.1	69.2	22.3	32.2	29.7	38.1	3.5	58.4
3-092	β0-thalassemia/Hb E	β0/βE	β CD17 (A-T)/Hb E	αα/αα	F	2.84	6	18	65	-	-	27.4	72.6	6.6	20.8
3-093	β0-thalassemia/Hb E	β0/βE	β CD 41/42 (-TTCT)/Hb E	αα/αα	F	5.25	8.8	29.9	57	16.8	29.4	29.6	80.3	8.6	11.1
3-094	β0-thalassemia/Hb E	β0/βE	β CD 41/42 (-TTCT)/Hb E	αα/αα	F	-	8.1	27	69.6	-	-	-	60.1	5.1	28.6
3-095	β0-thalassemia/Hb E	β0/βE	β CD 41/42 (-TTCT)/Hb E	αα/αα	F	3.82	8.3	25.9	67.9	21.7	32	26.2	35	2.5	57.1
3-096	β0-thalassemia/Hb E	β0/βE	β CD 41/42 (-TTCT)/Hb E	αα/αα	F	3.47	6.2	18	55.4	18.8	34	29.8	77.9	5.1	16.2
3-097	β0-thalassemia/Hb E	β0/βE	β CD 41/42 (-TTCT)/Hb E	αα/αα	F	-	7.6	24.4	51.9	16.1	31		71.1	8.7	18.7
3-098	β0-thalassemia/Hb E	β0/βE	β CD 41/42 (-TTCT)/Hb E	αα/αα	F	5.5	7.8	26	51.5	15.4	30	24.4	76	8.5	13.1
3-099	β0-thalassemia/Hb E	β0/βE	β CD 41/42 (-TTCT)/Hb E	αα/αα	F	-	-	-	-	-	-	-	72.1	9.6	18.3
3-100	β0-thalassemia/Hb E	β0/βE	β CD17 (A-T)/Hb E	αα/αα	F	-	-	-	-	-	-	-	71.5	6.1	22.4
3-101	β0-thalassemia/Hb E	β0/βE	β CD 41/42 (-TTCT)/Hb E	αα/αα	F	-	-	-	-	-	-	-	71	6.1	21.1
3-102	β0-thalassemia/Hb E	β0/βE	β CD 41/42 (-TTCT)/Hb E	αα/αα	F	5.19	7.9	25.3	48.7	15.2	31.2	24.3	87.7	8.1	12.3
3-103	β0-thalassemia/Hb E	β0/βE	β CD17 (A-T)/Hb E	αα/αα	F	-	-	-	62.3	-	-	-	92.6	8.4	7.4
3-104	β0-thalassemia/Hb E	β0/βE	β CD71/72 (+A)/Hb E	αα/αα	F	5.81	9.1	26.9	46.3	15.7	33.8	22.4	90.5	10.2	9.5
3-105	β0-thalassemia/Hb E	β0/βE	β CD17 (A-T)/Hb E	αα/αα	F	-	-	-	-	-	-	-	72.3	7.6	27.7
3-106	β0-thalassemia/Hb E	β0/βE	β CD 41/42 (-TTCT)/Hb E	αα/αα	F	3.41	6	19	57	17.6	30.9	30.2	82.6	7.1	17.4
3-107	β0-thalassemia/Hb E	β0/βE	β CD71/72 (+A)/Hb E	αα/αα	F	-	-	-	-	-	-	-	85.6	6.6	14.1
3-108	β0-thalassemia/Hb E	β0/βE	β CD17 (A-T)/Hb E	αα/αα	F	4.54	7.4	25.6	65.5	16.3	28.8	22.4	87.6	7.5	12.4
3-109	β0-thalassemia/Hb E	β0/βE	β CD 41/42 (-TTCT)/Hb E	αα/αα	F	-	-	-	-	-	-	-	51.4	3.5	48.6
3-110	β0-thalassemia/Hb E	β0/βE	β CD 41/42 (-TTCT)/Hb E	αα/αα	F	-	8	23.8	44.6	15	33.6	-	75.7	8.1	24.3
3-111	β0-thalassemia/Hb E	β0/βE	β CD 41/42 (-TTCT)/Hb E	αα/αα	F	4.1	7.5	24.6	60	18.3	30.5	26.9	80.5	7.9	19.5
3-112	β0-thalassemia/Hb E	β0/βE	β CD17 (A-T)/Hb E	αα/αα	F	-	6.8	22.1	67	-	-	-	42.7	4.1	57.3
3-113	β0-thalassemia/Hb E	β0/βE	β CD 41/42 (-TTCT)/Hb E	αα/αα	F	-	-	20	-	-	-	-	78.9	7	21.1
3-114	β0-thalassemia/Hb E	β0/βE	β CD 41/42 (-TTCT)/Hb E	αα/αα	F	3.87	7.2	21.5	55.5	18.5	33.3	34.5	65.1	6.5	34.9
3-115	β0-thalassemia/Hb E	β0/βE	β CD17 (A-T)/Hb E	αα/αα	F	-	-	-	-	-	-	-	50.4	5.1	49.6
3-116	β0-thalassemia/Hb E	β0/βE	β CD 41/42 (-TTCT)/Hb E	αα/αα	F	-	-	-	-	-	-	-	48.4	4.7	51.6
3-117	β0-thalassemia/Hb E	β0/βE	β CD 41/42 (-TTCT)/Hb E	αα/αα	F	-	-	-	47	-	-	-	69.2	6	30.8
3-118	β0-thalassemia/Hb E	β0/βE	β CD 41/42 (-TTCT)/Hb E	αα/αα	F	-	-	-	49.3	18.4	-	-	78.8	5.8	20.2
3-119	β0-thalassemia/Hb E	β0/βE	β CD71/72 (+A)/Hb E	αα/αα	F	-	-	-	54	-	-	-	89.1	9	10.9
3-120	β0-thalassemia/Hb E	β0/βE	β CD17 (A-T)/Hb E	αα/αα	F	-	-	-	77.4	23.3	-	-	52.5	4.1	47.5
3-121	β0-thalassemia/Hb E	β0/βE	β CD 41/42 (-TTCT)/Hb E	αα/αα	F	-	-	-	47	15	-	-	87.1	8.1	12.9
3-122	β0-thalassemia/Hb E	β0/βE	β CD 41/42 (-TTCT)/Hb E	αα/αα	F	-	-	-	65.3	24	-	-	54.6	4.8	45.4
3-123	β0-thalassemia/Hb E	β0/βE	β CD 41/42 (-TTCT)/Hb E	αα/αα	F	-	-	-	-	-	-	-	87.1	6.9	12.9
3-124	β0-thalassemia/Hb E	β0/βE	β CD17 (A-T)/Hb E	αα/αα	F	-	-	22.6	58.4	-	-	-	78.5	6.3	19.6
3-125	β0-thalassemia/Hb E	β0/βE	β CD17 (A-T)/Hb E	αα/αα	F	7.47	12	35.9	48.1	16.1	33.5	22.8	82.5	9.5	16.5
4-001	β3.4-thalassemia/Hb E	β3.4/βE	β 3.4 kb deletion/Hb E	αα/αα	M	-	-	-	-	-	-	-	56.3	-	26.7
4-002	β3.4-thalassemia/Hb E	β3.4/βE	β 3.4 kb deletion/Hb E	αα/αα	F	4.44	10.1	28.3	63.8	22.8	35.7	-	50.2	-	47.2
4-003	β3.4-thalassemia/Hb E	β3.4/βE	β 3.4 kb deletion/Hb E	αα/αα	F	4.98	12.3	36.6	74.2	24.7	33.3	23.6	42.2	3.4	54.1
4-004	β3.4-thalassemia/Hb E	β3.4/βE	β 3.4 kb deletion/Hb E	αα/αα	F	-	-	-	-	-	-	-	55.3	4.2	40.8
4-005	β3.4-thalassemia/Hb E	β3.4/βE	β 3.4 kb deletion/Hb E	αα/αα	M	5.28	11.6	35	66.3	21.3	33	-	48.6	4.3	46.9
4-006	β3.4-thalassemia/Hb E	β3.4/βE	β 3.4 kb deletion/Hb E	αα/αα	F	5.73	10.5	34.9	60.9	18.3	30.1	23.5	46.2	-	42.3
4-007	β3.4-thalassemia/Hb E	β3.4/βE	β 3.4 kb deletion/Hb E	αα/αα	M	-	-	-	-	-	-	-	58.2	6.5	39.2
4-008	β3.4-thalassemia/Hb E	β3.4/βE	β 3.4 kb deletion/Hb E	αα/αα	F	-	-	-	-	-	-	-	51	3.7	49
4-009	β3.4-thalassemia/Hb E	β3.4/βE	β 3.4 kb deletion/Hb E	αα/αα	F	3.42	8.2	23.7	69.3	24	34.6	21.5	42.2	3.4	55.8
4-010	β3.4-thalassemia/Hb E	β3.4/βE	β 3.4 kb deletion/Hb E	αα/αα	F	4.16	8.8	27.6	66.2	21.2	31.9	24.4	51.5	-	42.2
4-011	β3.4-thalassemia/Hb E	β3.4/βE	β 3.4 kb deletion/Hb E	αα/αα	M	4.9	11.4	31.9	65.1	23.3	35.7	19.7	42.8	3.6	51.3
4-012	β3.4-thalassemia/Hb E	β3.4/βE	β 3.4 kb deletion/Hb E	αα/αα	F	3.59	8.2	24	66.8	22.9	34.3	-	49.9	3.8	46.6
4-013	β3.4-thalassemia/Hb E	β3.4/βE	β 3.4 kb deletion/Hb E	αα/αα	M	3.75	8.7	27	72	23.2	32.2	-	44.8	4.5	55.2
4-014	β3.4-thalassemia/Hb E	β3.4/βE	β 3.4 kb deletion/Hb E	αα/αα	F	-	-	-	68	-	-	-	42.8	3.2	55.6
4-015	β3.4-thalassemia/Hb E	β3.4/βE	β 3.4 kb deletion/Hb E	αα/αα	M	-	-	-	66.7	-	-	-	49	4.6	46.9
4-016	β3.4-thalassemia/Hb E	β3.4/βE	β 3.4 kb deletion/Hb E	αα/αα	F	4.27	10.1	28.9	67.7	23.7	34.9	24.5	53.7	3.9	46.3
4-017	β3.4-thalassemia/Hb E	β3.4/βE	β 3.4 kb deletion/Hb E	αα/αα	F	4.23	11.6	36.2	85.4	27.4	32	20.6	29.8	1.4	70.2
4-018	β3.4-thalassemia/Hb E	β3.4/βE	β 3.4 kb deletion/Hb E	αα/αα	M	-	-	-	-	-	-	-	53.6	-	46
4-019	β3.4-thalassemia/Hb E	β3.4/βE	β 3.4 kb deletion/Hb E	αα/αα	F	4.64	10.7	32	68.9	23.1	-	21.6	51.2	-	48.2
4-020	β3.4-thalassemia/Hb E	β3.4/βE	β 3.4 kb deletion/Hb E	αα/αα	M	-	-	-	63.9	22.5	-	-	47.7	3.9	52.3

## Sheet: Raw data Table 2
No.	Groups	β-genotype	α-genotype	Sex	RBC (10^12/L)	Hb (g/dL)	Hct (%)	MCV (fL)	MCH (pg)	MCHC (g/dL)	RDW (%)	Hb A2 (%)	Hb F (%)
1-001	β3.4-thalassemia trait	β3.4/βA	αα/αα	M	6.2	13.2	39.7	64	21.4	33.2	21.7	7	6.8
1-002	β3.4-thalassemia trait	β3.4/βA	αα/αα	M	5.71	12	36	63	21	33.3	-	6.9	-
1-003	β3.4-thalassemia trait	β3.4/βA	αα/αα	M	-	-	-	63.7	20.8	32.7	-	7.6	-
1-004	β3.4-thalassemia trait	β3.4/βA	αα/αα	M	-	-	-	63.7	20.8	32.7	-	7.6	-
1-005	β3.4-thalassemia trait	β3.4/βA	αα/αα	F	3.94	8.5	25.5	64.7	21.6	33.3	17.5	8.7	-
1-006	β3.4-thalassemia trait	β3.4/βA	αα/αα	F	4.93	10	32	65.1	20.3	31.2	18.5	7.8	6.8
1-007	β3.4-thalassemia trait	β3.4/βA	αα/αα	M	6.57	14.3	46	70	21.7	31.2	13.5	7	4.5
1-008	β3.4-thalassemia trait	β3.4/βA	αα/αα	M	-	-	-	70	22	31.4	-	-	-
1-009	β3.4-thalassemia trait	β3.4/βA	αα/αα	M	-	14.1	43	-	-	32.8	-	7.5	7
1-010	β3.4-thalassemia trait	β3.4/βA	αα/αα	M	-	-	-	65.5	21.5	32.8	-	7.4	-
1-011	β3.4-thalassemia trait	β3.4/βA	αα/αα	M	6.17	13.4	40.7	66	21.7	32.9	20.5	6.7	7.1
1-012	β3.4-thalassemia trait	β3.4/βA	αα/αα	F	5.76	11.4	34	59	19.9	33.5	21.1	6.4	9.3
1-013	β3.4-thalassemia trait	β3.4/βA	αα/αα	F	4.69	10.3	30.5	65	21.8	33.8	18.1	7.9	5.7
1-014	β3.4-thalassemia trait	β3.4/βA	αα/αα	M	6.46	14.4	42	65	22.4	34.3	19.3	7	3.5
1-015	β3.4-thalassemia trait	β3.4/βA	αα/αα	M	-	-	-	60	-	-	-	7.7	2
1-016	β3.4-thalassemia trait	β3.4/βA	αα/αα	F	-	-	-	67	19.2	28.7	-	6.6	-
1-017	β3.4-thalassemia trait	β3.4/βA	αα/αα	M	4.69	8.8	30	64	19	29.3	-	5.4	15.7
1-018	β3.4-thalassemia trait	β3.4/βA	αα/αα	F	5.69	11.2	37.5	65.9	19.7	29.9	14.9	7.4	3
1-019	β3.4-thalassemia trait	β3.4/βA	αα/αα	M	5.32	10.3	34.2	64.4	19.3	30	22.6	7.1	11.4
1-020	β3.4-thalassemia trait	β3.4/βA	αα/αα	M	6.16	13.2	43.4	71	21.4	30.4	-	7.6	5.5
1-021	β3.4-thalassemia trait	β3.4/βA	αα/αα	M	6.28	13.9	45.2	72	22.2	30.8	15	7	4.7
1-022	β3.4-thalassemia trait	β3.4/βA	αα/αα	M	6.03	12.5	40.4	67	20.7	30.9	15.1	7.5	2.2
1-023	β3.4-thalassemia trait	β3.4/βA	αα/αα	M	7.1	14	45	63.7	19.8	31	15.9	7.3	3.9
1-024	β3.4-thalassemia trait	β3.4/βA	αα/αα	M	6.5	14	44.6	68.6	21.5	31.4	15.9	7.9	5.2
1-025	β3.4-thalassemia trait	β3.4/βA	αα/αα	F	5.6	10.9	34.7	62	19.4	31.4	16.3	6.2	8
1-026	β3.4-thalassemia trait	β3.4/βA	αα/αα	M	6.25	12.6	40	64	20.1	31.5	19.5	7.7	5.1
1-027	β3.4-thalassemia trait	β3.4/βA	αα/αα	F	4.16	8.7	26.5	66.8	22	31.5	19	7.5	5.4
1-028	β3.4-thalassemia trait	β3.4/βA	αα/αα	M	4.94	10.5	33.1	67	21.1	31.7	20	6.1	13.8
1-029	β3.4-thalassemia trait	β3.4/βA	αα/αα	F	5.04	10.9	34.3	68	21.6	31.8	18.9	6.8	7.6
1-030	β3.4-thalassemia trait	β3.4/βA	αα/αα	M	6.29	13.3	41.9	66	21.2	31.8	18.5	-	-
1-031	β3.4-thalassemia trait	β3.4/βA	αα/αα	F	4.43	8.6	27	61	19.3	31.9	20.8	6.5	5.1
1-032	β3.4-thalassemia trait	β3.4/βA	αα/αα	M	5.77	12.7	39.8	69	22	31.9	20.2	6.4	7.9
1-033	β3.4-thalassemia trait	β3.4/βA	αα/αα	F	4.74	10.5	32.8	69	22	32	20	5.7	13.1
1-034	β3.4-thalassemia trait	β3.4/βA	αα/αα	M	6.06	13	40.6	67	21.6	32	18	7.2	5.8
1-035	β3.4-thalassemia trait	β3.4/βA	αα/αα	F	4.25	9.4	29.3	69	22.2	32.1	18.9	6.3	6.7
1-036	β3.4-thalassemia trait	β3.4/βA	αα/αα	F	5.59	11	34.1	61	19.7	32.3	-	6.8	3.3
1-037	β3.4-thalassemia trait	β3.4/βA	αα/αα	F	4.79	11	34	71	23.2	32.4	20.1	7.5	3.7
1-038	β3.4-thalassemia trait	β3.4/βA	αα/αα	F	5.16	10.7	33	64	20.7	32.4	19.7	6.9	7.6
1-039	β3.4-thalassemia trait	β3.4/βA	αα/αα	M	6.27	12.9	39.5	63	20.5	32.7	19.6	7.4	7
1-040	β3.4-thalassemia trait	β3.4/βA	αα/αα	F	5.03	9.7	29.7	59	19.2	32.7	19.8	8	4.3
1-041	β3.4-thalassemia trait	β3.4/βA	αα/αα	F	4.29	9.8	30	70	22.8	32.7	20.6	7.1	3.5
1-042	β3.4-thalassemia trait	β3.4/βA	αα/αα	M	6.4	13.6	41.6	65	21.2	32.7	19.8	6.7	7.3
1-043	β3.4-thalassemia trait	β3.4/βA	αα/αα	F	4.44	9	27.5	62	20.2	32.7	20.9	7.6	7.2
1-044	β3.4-thalassemia trait	β3.4/βA	αα/αα	F	4.93	10.8	33	67	22	32.7	19.5	6.3	7.2
1-045	β3.4-thalassemia trait	β3.4/βA	αα/αα	M	6.03	12.5	38	63	20.8	32.9	22.3	7.5	6.9
1-046	β3.4-thalassemia trait	β3.4/βA	αα/αα	F	4.67	10.3	31.3	67	22	32.9	20.4	5.9	8.6
1-047	β3.4-thalassemia trait	β3.4/βA	αα/αα	M	6.98	13.1	39.8	57	18.8	32.9	21.1	7.1	2.1
1-048	β3.4-thalassemia trait	β3.4/βA	αα/αα	M	6.45	13.8	41.9	65	21.4	32.9	21.4	7	8.4
1-049	β3.4-thalassemia trait	β3.4/βA	αα/αα	M	4.88	12.4	37.6	77	25.4	33	18.4	5.1	13.5
1-050	β3.4-thalassemia trait	β3.4/βA	αα/αα	F	3.75	8.3	25.1	67	22.2	33.1	20.2	6.8	8.9
1-051	β3.4-thalassemia trait	β3.4/βA	αα/αα	F	5.18	12.5	37.8	73	22.8	33.1	-	7.3	4.9
1-052	β3.4-thalassemia trait	β3.4/βA	αα/αα	F	4.46	9.6	29	65	21.5	33.1	-	8.3	5.6
1-053	β3.4-thalassemia trait	β3.4/βA	αα/αα	M	5.86	12.3	36.9	63	21	33.3	19.6	8.6	1
1-054	β3.4-thalassemia trait	β3.4/βA	αα/αα	F	6.23	13.7	41.1	66	22	33.3	-	7.1	3.2
1-055	β3.4-thalassemia trait	β3.4/βA	αα/αα	F	-	11	33	-	-	33.3	-	6.7	7.8
1-056	β3.4-thalassemia trait	β3.4/βA	αα/αα	M	6.29	13.7	40.9	65	21.9	33.5	19.8	7.3	5.6
1-057	β3.4-thalassemia trait	β3.4/βA	αα/αα	F	5.2	10.9	32.6	62.6	21	33.5	21.2	5.7	8.9
1-058	β3.4-thalassemia trait	β3.4/βA	αα/αα	F	5.5	11.2	33	60	20.4	33.9	-	6.5	8.6
1-059	β3.4-thalassemia trait	β3.4/βA	αα/αα	M	5.5	10.5	30.8	56	19.1	34.1	21.3	7.4	8.1
1-060	β3.4-thalassemia trait	β3.4/βA	αα/αα	M	6.66	14.1	41.3	62	21.2	34.1	18.5	7.2	3.2
1-061	β3.4-thalassemia trait	β3.4/βA	αα/αα	M	5.68	12.6	36.9	65	22.1	34.1	20.3	7	5.6
1-062	β3.4-thalassemia trait	β3.4/βA	αα/αα	M	-	-	-	62.2	-	-	-	-	-
1-063	β3.4-thalassemia trait	β3.4/βA	αα/αα	M	-	-	-	63	-	-	-	7.7	2.2
1-064	β3.4-thalassemia trait	β3.4/βA	αα/αα	M	-	-	-	63	-	-	-	7.5	2
1-065	β3.4-thalassemia trait	β3.4/βA	αα/αα	F	-	-	-	66.3	-	-	-	6.5	7.2
1-066	β3.4-thalassemia trait	β3.4/βA	αα/αα	M	-	-	-	69	-	-	-	7.2	3.1
1-067	β3.4-thalassemia trait	β3.4/βA	αα/αα	F	-	-	-	69	-	-	-	-	-
1-068	β3.4-thalassemia trait	β3.4/βA	αα/αα	F	4.75	-	33	69.5	-	-	-	6.9	-
1-069	β3.4-thalassemia trait	β3.4/βA	αα/αα	M	-	-	-	70	-	-	-	6.9	3.1
1-070	β3.4-thalassemia trait	β3.4/βA	αα/αα	M	-	-	-	71	-	-	-	5.3	12.4
1-071	β3.4-thalassemia trait	β3.4/βA	αα/αα	F	-	-	40	-	-	-	-	5.9	0.5
1-072	β3.4-thalassemia trait	β3.4/βA	αα/αα	M	-	-	-	-	-	-	-	7.9	4.1
1-073	β3.4-thalassemia trait	β3.4/βA	αα/αα	M	-	-	-	-	-	-	-	7.3	3.3
1-074	β3.4-thalassemia trait	β3.4/βA	αα/αα	F	-	-	-	-	-	-	-	6.4	8.5
1-075	β3.4-thalassemia trait	β3.4/βA	αα/αα	F	-	-	-	-	-	-	-	7.6	3.7
1-076	β3.4-thalassemia trait	β3.4/βA	αα/αα	F	-	-	-	-	-	-	-	6.5	-
1-077	β3.4-thalassemia trait	β3.4/βA	αα/αα	F	-	-	-	-	-	-	-	5.4	11
1-078	β3.4-thalassemia trait	β3.4/βA	αα/αα	M	-	-	-	-	-	-	-	7.8	1.3
1-079	β3.4-thalassemia trait	β3.4/βA	αα/αα	M	-	-	-	-	-	-	-	6.6	6.5
1-080	β3.4-thalassemia trait	β3.4/βA	αα/αα	F	4.13	9.7	32.2	78	23.5	30.1	-	7.1	6.7
1-081	β3.4-thalassemia trait	β3.4/βA	αα/αα	M	5.71	11.3	36	63	19.8	31.4	19	7.6	4.5
1-082	β3.4-thalassemia trait	β3.4/βA	αα/αα	M	6.17	12.8	40.3	65.4	20.8	31.8	19.7	8.6	-
1-083	β3.4-thalassemia trait	β3.4/βA	αα/αα	M	6.48	13.8	42.8	66	21.3	32.2	21.8	7.2	5.3
1-084	β3.4-thalassemia trait	β3.4/βA	αα/αα	F	4.63	10.1	31	67	21.8	32.6	19.7	6.7	7.8
1-085	β3.4-thalassemia trait	β3.4/βA	αα/αα	F	4.89	10.8	33	66.4	22.1	32.7	20.1	6.1	10.9
1-086	β3.4-thalassemia trait	β3.4/βA	αα/αα	F	5.41	11.3	34	62.9	20.7	33.2	-	7.7	7.9
1-087	β3.4-thalassemia trait	β3.4/βA	αα/αα	F	5.48	11.9	35.5	64.8	22.7	35	-	6.9	-
1-088	β3.4-thalassemia trait	β3.4/βA	αα/αα	F	-	-	-	68	-	-	-	5.9	8.8
1-089	β3.4-thalassemia trait	β3.4/βA	αα/αα	M	5.01	11.3	37.1	74	22.5	30.4	-	6.5	4.9
1-090	β3.4-thalassemia trait	β3.4/βA	αα/αα	F	5.49	11.3	36.4	66.4	20.7	31.1	18.7	6.9	-
1-091	β3.4-thalassemia trait	β3.4/βA	αα/αα	F	4.83	10.3	33	68.2	22.3	31.2	-	6.1	19
1-092	β3.4-thalassemia trait	β3.4/βA	αα/αα	M	6.01	13.3	37.5	62.4	22.1	35.5	-	6.4	3.4
1-093	β3.4-thalassemia trait	β3.4/βA	αα/αα	F	4.53	9.6	33.4	73.7	21.2	28.7	-	5.2	-
1-094	β3.4-thalassemia trait	β3.4/βA	αα/αα	M	6.3	14.4	46.9	74.4	22.8	30.7	15.2	5.1	6.1
1-095	β3.4-thalassemia trait	β3.4/βA	αα/αα	M	7.23	14.7	47	65	20	31	-	7.3	3.4
1-096	β3.4-thalassemia trait	β3.4/βA	αα/αα	F	4.88	11.5	37	75	23.6	31.1	17.6	5.8	10.5
1-097	β3.4-thalassemia trait	β3.4/βA	αα/αα	M	-	-	-	70.5	22	31.2	-	6.7	10.7
1-098	β3.4-thalassemia trait	β3.4/βA	αα/αα	M	5.29	12.1	38.1	72	23	31.8	21.7	6.3	13.3
1-099	β3.4-thalassemia trait	β3.4/βA	αα/αα	M	5.44	12.8	40	73.5	23.5	31.8	-	6	6.8
1-100	β3.4-thalassemia trait	β3.4/βA	αα/αα	F	5	10.5	33	65.9	21.2	32.2	19.5	-	-
1-101	β3.4-thalassemia trait	β3.4/βA	αα/αα	F	5.3	10.1	31	59.7	19.3	32.3	19.7	7.4	3.3
1-102	β3.4-thalassemia trait	β3.4/βA	αα/αα	M	4.97	11.8	36.1	72.5	23.7	32.7	18.1	6.1	6.1
1-103	β3.4-thalassemia trait	β3.4/βA	αα/αα	F	4.77	9.7	31	65	20.3	31.3	19.5	7.1	6.1
2-001	β3.4-thalassemia trait with α+-thalassemia	β3.4/βA	-α/αα	M	-	-	-	64.3	21.6	33.6	-	7.9	-
2-002	β3.4-thalassemia trait with α+-thalassemia	β3.4/βA	-α/αα	M	-	-	-	73.4	-	-	-	7.2	2.4
2-003	β3.4-thalassemia trait with α+-thalassemia	β3.4/βA	-α/αα	M	5.51	12.5	38	69	21	30	17	6.7	0.5
2-004	β3.4-thalassemia trait with α+-thalassemia	β3.4/βA	-α/αα	M	-	-	-	-	-	-	-	7.2	-
2-005	β3.4-thalassemia trait with α+-thalassemia	β3.4/βA	-α/αα	F	4.25	10.2	32	75	23.9	31.9	-	6.1	-
2-006	β3.4-thalassemia trait with α+-thalassemia	β3.4/βA	-α/αα	F	3.84	11.2	36	85	24.8	29.1	15.5	5.9	11.5
2-007	β3.4-thalassemia trait with α+-thalassemia	β3.4/βA	-α/αα	M	6.09	14.9	45.7	75	24.5	32.6	13.3	7.1	1.4
2-008	β3.4-thalassemia trait with α+-thalassemia	β3.4/βA	-α/αα	F	-	-	-	70.2	-	-	-	6.7	4.3
2-009	β3.4-thalassemia trait with α+-thalassemia	β3.4/βA	-α/αα	M	-	-	-	-	-	-	-	7.5	0.5
2-010	β3.4-thalassemia trait with α+-thalassemia	β3.4/βA	-α/αα	M	-	-	-	-	-	-	-	5.4	0.4
2-011	β3.4-thalassemia trait with α+-thalassemia	β3.4/βA	-α/αα	M	-	-	-	-	-	-	-	7.6	1.5
2-012	β3.4-thalassemia trait with α+-thalassemia	β3.4/βA	-α/αα	M	-	-	-	-	-	-	-	7.1	3.7
2-013	β3.4-thalassemia trait with α+-thalassemia	β3.4/βA	-α/αα	M	6.27	13.5	41.6	66.3	21.5	32.5	-	6.8	4.1
3-001	β3.4-thalassemia trait with Hb Constant Spring	β3.4/βA	αCSα/αα	M	6.22	13.9	42.9	69	22.2	32.4	15	6.6	3.2
3-002	β3.4-thalassemia trait with Hb Constant Spring	β3.4/βA	αCSα/αα	F	5.28	12.6	38	72	23.9	33.2	-	6.6	18.4
3-003	β3.4-thalassemia trait with Hb Constant Spring	β3.4/βA	αCSα/αα	F	5.51	11.6	36.9	67	21	31.4	16.5	7.6	3.6
3-004	β3.4-thalassemia trait with Hb Constant Spring	β3.4/βA	αCSα/αα	M	6.29	12.5	39	62	20	32.1	20.1	8.1	6.6
3-005	β3.4-thalassemia trait with Hb Constant Spring	β3.4/βA	αCSα/αα	F	4.05	9.9	30	74	24.6	33	16.9	6.1	9.5
3-006	β3.4-thalassemia trait with Hb Constant Spring	β3.4/βA	αCSα/αα	F	-	-	-	68.1	22.8	33.5	-	6	8.1
3-007	β3.4-thalassemia trait with Hb Constant Spring	β3.4/βA	αCSα/αα	F	5	11	33	66	21.7	33.3	21	6.5	14.5
4-001	β3.4-thalassemia trait with homozygous α+-thalassemia	β3.4/βA	-α/-α	M	-	-	-	71.4	-	-	-	7.2	-
5-001	β3.4-thalassemia trait with α0-thalassemia	β3.4/βA	--/αα	F	-	-	-	-	-	-	-	6.3	3.9
5-002	β3.4-thalassemia trait with α0-thalassemia	β3.4/βA	--/αα	F	4.53	10.3	30.7	67.8	22.7	33.6	18.1	7	3.6
6-001	β3.4-thalassemia trait with Hb H disease	β3.4/βA	--/-α	F	5.82	9.2	29.7	51	15.8	31.2	-	5	2.5
7-001	β3.4-thalassemia trait with α-globin triplication	β3.4/βA	αααanti-3.7/αα	M	6.4	13	40	62	20.3	32.5	13.7	7.2	6.8

## Sheet: Raw data Table 3
No	Groups	β-genotype	α-genotype	SNPs	SNPs Genotype	Sex	RBC (10^12/L)	Hb (g/dL)	Hct (%)	MCV (fL)	MCH (pg)	MCHC (g/dL)	RDW (%)	Hb A2 (%)	Hb F (%)
1-001	β3.4-thalassemia trait	β3.4/βA	αα/αα	Four bp deletion (-AGCA) in Ag-globin promoter	WT/WT	F	4.93	10	32	65.1	20.3	31.2	18.5	7.8	6.8
1-002	β3.4-thalassemia trait	β3.4/βA	αα/αα	Four bp deletion (-AGCA) in Ag-globin promoter	WT/WT	M	6.57	14.3	46	70	21.7	31.2	13.5	7	4.5
1-003	β3.4-thalassemia trait	β3.4/βA	αα/αα	Four bp deletion (-AGCA) in Ag-globin promoter	WT/WT	M	-	-	-	70	22	31.4	-	-	-
1-004	β3.4-thalassemia trait	β3.4/βA	αα/αα	Four bp deletion (-AGCA) in Ag-globin promoter	WT/WT	M	-	14.1	43	-	-	32.8	-	7.5	7
1-005	β3.4-thalassemia trait	β3.4/βA	αα/αα	Four bp deletion (-AGCA) in Ag-globin promoter	WT/WT	M	-	-	-	65.5	21.5	32.8	-	7.4	-
1-006	β3.4-thalassemia trait	β3.4/βA	αα/αα	Four bp deletion (-AGCA) in Ag-globin promoter	WT/WT	M	6.17	13.4	40.7	66	21.7	32.9	20.5	6.7	7.1
1-007	β3.4-thalassemia trait	β3.4/βA	αα/αα	Four bp deletion (-AGCA) in Ag-globin promoter	WT/WT	F	5.76	11.4	34	59	19.9	33.5	21.1	6.4	9.3
1-008	β3.4-thalassemia trait	β3.4/βA	αα/αα	Four bp deletion (-AGCA) in Ag-globin promoter	WT/WT	F	4.69	10.3	30.5	65	21.8	33.8	18.1	7.9	5.7
1-009	β3.4-thalassemia trait	β3.4/βA	αα/αα	Four bp deletion (-AGCA) in Ag-globin promoter	WT/WT	M	6.46	14.4	42	65	22.4	34.3	19.3	7	3.5
1-010	β3.4-thalassemia trait	β3.4/βA	αα/αα	Four bp deletion (-AGCA) in Ag-globin promoter	WT/WT	M	-	-	-	60	-	-	-	7.7	2
1-011	β3.4-thalassemia trait	β3.4/βA	αα/αα	Four bp deletion (-AGCA) in Ag-globin promoter	WT/WT	F	-	-	-	67	19.2	28.7	-	6.6	-
1-012	β3.4-thalassemia trait	β3.4/βA	αα/αα	Four bp deletion (-AGCA) in Ag-globin promoter	WT/WT	M	4.69	8.8	30	64	19	29.3	-	5.4	15.7
1-013	β3.4-thalassemia trait	β3.4/βA	αα/αα	Four bp deletion (-AGCA) in Ag-globin promoter	WT/WT	F	5.69	11.2	37.5	65.9	19.7	29.9	14.9	7.4	3
1-014	β3.4-thalassemia trait	β3.4/βA	αα/αα	Four bp deletion (-AGCA) in Ag-globin promoter	WT/WT	M	5.32	10.3	34.2	64.4	19.3	30	22.6	7.1	11.4
1-015	β3.4-thalassemia trait	β3.4/βA	αα/αα	Four bp deletion (-AGCA) in Ag-globin promoter	WT/WT	M	6.16	13.2	43.4	71	21.4	30.4	-	7.6	5.5
1-016	β3.4-thalassemia trait	β3.4/βA	αα/αα	Four bp deletion (-AGCA) in Ag-globin promoter	WT/WT	M	6.28	13.9	45.2	72	22.2	30.8	15	7	4.7
1-017	β3.4-thalassemia trait	β3.4/βA	αα/αα	Four bp deletion (-AGCA) in Ag-globin promoter	WT/WT	M	6.03	12.5	40.4	67	20.7	30.9	15.1	7.5	2.2
1-018	β3.4-thalassemia trait	β3.4/βA	αα/αα	Four bp deletion (-AGCA) in Ag-globin promoter	WT/WT	M	7.1	14	45	63.7	19.8	31	15.9	7.3	3.9
1-019	β3.4-thalassemia trait	β3.4/βA	αα/αα	Four bp deletion (-AGCA) in Ag-globin promoter	WT/WT	M	6.5	14	44.6	68.6	21.5	31.4	15.9	7.9	5.2
1-020	β3.4-thalassemia trait	β3.4/βA	αα/αα	Four bp deletion (-AGCA) in Ag-globin promoter	WT/WT	F	5.6	10.9	34.7	62	19.4	31.4	16.3	6.2	8
1-021	β3.4-thalassemia trait	β3.4/βA	αα/αα	Four bp deletion (-AGCA) in Ag-globin promoter	WT/WT	M	6.25	12.6	40	64	20.1	31.5	19.5	7.7	5.1
1-022	β3.4-thalassemia trait	β3.4/βA	αα/αα	Four bp deletion (-AGCA) in Ag-globin promoter	WT/WT	F	4.16	8.7	26.5	66.8	22	31.5	19	7.5	5.4
1-023	β3.4-thalassemia trait	β3.4/βA	αα/αα	Four bp deletion (-AGCA) in Ag-globin promoter	WT/WT	M	4.94	10.5	33.1	67	21.1	31.7	20	6.1	13.8
1-024	β3.4-thalassemia trait	β3.4/βA	αα/αα	Four bp deletion (-AGCA) in Ag-globin promoter	WT/WT	F	5.04	10.9	34.3	68	21.6	31.8	18.9	6.8	7.6
1-025	β3.4-thalassemia trait	β3.4/βA	αα/αα	Four bp deletion (-AGCA) in Ag-globin promoter	WT/WT	M	6.29	13.3	41.9	66	21.2	31.8	18.5	-	-
1-026	β3.4-thalassemia trait	β3.4/βA	αα/αα	Four bp deletion (-AGCA) in Ag-globin promoter	WT/WT	F	4.43	8.6	27	61	19.3	31.9	20.8	6.5	5.1
1-027	β3.4-thalassemia trait	β3.4/βA	αα/αα	Four bp deletion (-AGCA) in Ag-globin promoter	WT/WT	M	5.77	12.7	39.8	69	22	31.9	20.2	6.4	7.9
1-028	β3.4-thalassemia trait	β3.4/βA	αα/αα	Four bp deletion (-AGCA) in Ag-globin promoter	WT/WT	F	4.74	10.5	32.8	69	22	32	20	5.7	13.1
1-029	β3.4-thalassemia trait	β3.4/βA	αα/αα	Four bp deletion (-AGCA) in Ag-globin promoter	WT/WT	M	6.06	13	40.6	67	21.6	31	18	7.2	5.8
1-030	β3.4-thalassemia trait	β3.4/βA	αα/αα	Four bp deletion (-AGCA) in Ag-globin promoter	WT/WT	F	4.25	9.4	29.3	69	22.2	32.1	18.9	6.3	6.7
1-031	β3.4-thalassemia trait	β3.4/βA	αα/αα	Four bp deletion (-AGCA) in Ag-globin promoter	WT/WT	F	5.59	11	34.1	61	19.7	32.3	-	6.8	3.3
1-032	β3.4-thalassemia trait	β3.4/βA	αα/αα	Four bp deletion (-AGCA) in Ag-globin promoter	WT/WT	F	4.79	11	34	71	23.2	32.4	20.1	7.5	3.7
1-033	β3.4-thalassemia trait	β3.4/βA	αα/αα	Four bp deletion (-AGCA) in Ag-globin promoter	WT/WT	F	5.16	10.7	33	64	20.7	32.4	19.7	6.9	7.6
1-034	β3.4-thalassemia trait	β3.4/βA	αα/αα	Four bp deletion (-AGCA) in Ag-globin promoter	WT/WT	M	6.27	12.9	39.5	63	20.5	32.7	19.6	7.4	7
1-035	β3.4-thalassemia trait	β3.4/βA	αα/αα	Four bp deletion (-AGCA) in Ag-globin promoter	WT/WT	F	5.03	9.7	29.7	59	19.2	32.7	19.8	8	4.3
1-036	β3.4-thalassemia trait	β3.4/βA	αα/αα	Four bp deletion (-AGCA) in Ag-globin promoter	WT/WT	F	4.29	9.8	30	70	22.8	32.7	20.6	7.1	3.5
1-037	β3.4-thalassemia trait	β3.4/βA	αα/αα	Four bp deletion (-AGCA) in Ag-globin promoter	WT/WT	M	6.4	13.6	41.6	65	21.2	32.7	19.8	6.7	7.3
1-038	β3.4-thalassemia trait	β3.4/βA	αα/αα	Four bp deletion (-AGCA) in Ag-globin promoter	WT/WT	F	4.44	9	27.5	62	20.2	32.7	20.9	7.6	7.2
1-039	β3.4-thalassemia trait	β3.4/βA	αα/αα	Four bp deletion (-AGCA) in Ag-globin promoter	WT/WT	F	4.93	10.8	33	67	22	32.7	19.5	6.3	7.2
1-040	β3.4-thalassemia trait	β3.4/βA	αα/αα	Four bp deletion (-AGCA) in Ag-globin promoter	WT/WT	M	6.03	12.5	38	63	20.8	32.9	22.3	7.5	6.9
1-041	β3.4-thalassemia trait	β3.4/βA	αα/αα	Four bp deletion (-AGCA) in Ag-globin promoter	WT/WT	F	4.67	10.3	31.3	67	22	32.9	20.4	5.9	8.6
1-042	β3.4-thalassemia trait	β3.4/βA	αα/αα	Four bp deletion (-AGCA) in Ag-globin promoter	WT/WT	M	6.98	13.1	39.8	57	18.8	32.9	21.1	7.1	2.1
1-043	β3.4-thalassemia trait	β3.4/βA	αα/αα	Four bp deletion (-AGCA) in Ag-globin promoter	WT/WT	M	6.45	13.8	41.9	65	21.4	32.9	21.4	7	8.4
1-044	β3.4-thalassemia trait	β3.4/βA	αα/αα	Four bp deletion (-AGCA) in Ag-globin promoter	WT/WT	M	4.88	12.4	37.6	77	25.4	33	18.4	5.1	13.5
1-045	β3.4-thalassemia trait	β3.4/βA	αα/αα	Four bp deletion (-AGCA) in Ag-globin promoter	WT/WT	F	3.75	8.3	25.1	67	22.2	33.1	20.2	6.8	8.9
1-046	β3.4-thalassemia trait	β3.4/βA	αα/αα	Four bp deletion (-AGCA) in Ag-globin promoter	WT/WT	F	5.18	12.5	37.8	73	22.8	33.1	-	7.3	4.9
1-047	β3.4-thalassemia trait	β3.4/βA	αα/αα	Four bp deletion (-AGCA) in Ag-globin promoter	WT/WT	F	4.46	9.6	29	65	21.5	33.1	-	8.3	5.6
1-048	β3.4-thalassemia trait	β3.4/βA	αα/αα	Four bp deletion (-AGCA) in Ag-globin promoter	WT/WT	M	5.86	12.3	36.9	63	21	33.3	19.6	8.6	1
1-049	β3.4-thalassemia trait	β3.4/βA	αα/αα	Four bp deletion (-AGCA) in Ag-globin promoter	WT/WT	F	6.23	13.7	41.1	66	22	33.3	-	7.1	3.2
1-050	β3.4-thalassemia trait	β3.4/βA	αα/αα	Four bp deletion (-AGCA) in Ag-globin promoter	WT/WT	F	-	11	33	-	-	33.3	-	6.7	7.8
1-051	β3.4-thalassemia trait	β3.4/βA	αα/αα	Four bp deletion (-AGCA) in Ag-globin promoter	WT/WT	M	6.29	13.7	40.9	65	21.9	33.5	19.8	7.3	5.6
1-052	β3.4-thalassemia trait	β3.4/βA	αα/αα	Four bp deletion (-AGCA) in Ag-globin promoter	WT/WT	F	5.2	10.9	32.6	62.6	21	33.5	21.2	5.7	8.9
1-053	β3.4-thalassemia trait	β3.4/βA	αα/αα	Four bp deletion (-AGCA) in Ag-globin promoter	WT/WT	F	5.5	11.2	33	60	20.4	33.9	-	6.5	8.6
1-054	β3.4-thalassemia trait	β3.4/βA	αα/αα	Four bp deletion (-AGCA) in Ag-globin promoter	WT/WT	M	5.5	10.5	30.8	56	19.1	34.1	21.3	7.4	8.1
1-055	β3.4-thalassemia trait	β3.4/βA	αα/αα	Four bp deletion (-AGCA) in Ag-globin promoter	WT/WT	M	6.66	14.1	41.3	62	21.2	34.1	18.5	7.2	3.2
1-056	β3.4-thalassemia trait	β3.4/βA	αα/αα	Four bp deletion (-AGCA) in Ag-globin promoter	WT/WT	M	5.68	12.6	36.9	65	22.1	34.1	20.3	7	5.6
1-057	β3.4-thalassemia trait	β3.4/βA	αα/αα	Four bp deletion (-AGCA) in Ag-globin promoter	WT/WT	M	-	-	-	62.2	-	-	-	3.6-8	-
1-058	β3.4-thalassemia trait	β3.4/βA	αα/αα	Four bp deletion (-AGCA) in Ag-globin promoter	WT/WT	M	-	-	-	63	-	-	-	7.7	2.2
1-059	β3.4-thalassemia trait	β3.4/βA	αα/αα	Four bp deletion (-AGCA) in Ag-globin promoter	WT/WT	M	-	-	-	63	-	-	-	7.5	2
1-060	β3.4-thalassemia trait	β3.4/βA	αα/αα	Four bp deletion (-AGCA) in Ag-globin promoter	WT/WT	F	-	-	-	66.3	-	-	-	6.5	7.2
1-061	β3.4-thalassemia trait	β3.4/βA	αα/αα	Four bp deletion (-AGCA) in Ag-globin promoter	WT/WT	M	-	-	-	69	-	-	-	7.2	3.1
1-062	β3.4-thalassemia trait	β3.4/βA	αα/αα	Four bp deletion (-AGCA) in Ag-globin promoter	WT/WT	F	-	-	-	69	-	-	-	-	-
1-063	β3.4-thalassemia trait	β3.4/βA	αα/αα	Four bp deletion (-AGCA) in Ag-globin promoter	WT/WT	F	4.75	-	33	69.5	-	-	-	6.9	-
1-064	β3.4-thalassemia trait	β3.4/βA	αα/αα	Four bp deletion (-AGCA) in Ag-globin promoter	WT/WT	M	-	-	-	70	-	-	-	6.9	3.1
1-065	β3.4-thalassemia trait	β3.4/βA	αα/αα	Four bp deletion (-AGCA) in Ag-globin promoter	WT/WT	M	-	-	-	71	-	-	-	5.3	12.4
1-066	β3.4-thalassemia trait	β3.4/βA	αα/αα	Four bp deletion (-AGCA) in Ag-globin promoter	WT/WT	F	-	-	40	-	-	-	-	5.9	0.5
1-067	β3.4-thalassemia trait	β3.4/βA	αα/αα	Four bp deletion (-AGCA) in Ag-globin promoter	WT/WT	M	-	-	-	-	-	-	-	7.9	4.1
1-068	β3.4-thalassemia trait	β3.4/βA	αα/αα	Four bp deletion (-AGCA) in Ag-globin promoter	WT/WT	M	-	-	-	-	-	-	-	7.3	3.3
1-069	β3.4-thalassemia trait	β3.4/βA	αα/αα	Four bp deletion (-AGCA) in Ag-globin promoter	WT/WT	F	-	-	-	-	-	-	-	6.4	8.5
1-070	β3.4-thalassemia trait	β3.4/βA	αα/αα	Four bp deletion (-AGCA) in Ag-globin promoter	WT/WT	F	-	-	-	-	-	-	-	7.6	3.7
1-071	β3.4-thalassemia trait	β3.4/βA	αα/αα	Four bp deletion (-AGCA) in Ag-globin promoter	WT/WT	F	-	-	-	-	-	-	-	6.5	-
1-072	β3.4-thalassemia trait	β3.4/βA	αα/αα	Four bp deletion (-AGCA) in Ag-globin promoter	WT/WT	F	-	-	-	-	-	-	-	5.4	11
1-073	β3.4-thalassemia trait	β3.4/βA	αα/αα	Four bp deletion (-AGCA) in Ag-globin promoter	WT/WT	M	-	-	-	-	-	-	-	7.8	1.3
1-074	β3.4-thalassemia trait	β3.4/βA	αα/αα	Four bp deletion (-AGCA) in Ag-globin promoter	WT/WT	M	-	-	-	-	-	-	-	6.6	6.5
1-075	β3.4-thalassemia trait	β3.4/βA	αα/αα	Four bp deletion (-AGCA) in Ag-globin promoter	WT/WT	F	4.13	9.7	32.2	78	23.5	30.1		7.1	6.7
1-076	β3.4-thalassemia trait	β3.4/βA	αα/αα	Four bp deletion (-AGCA) in Ag-globin promoter	WT/WT	M	5.71	11.3	36	63	19.8	31.4	19	7.6	4.5
1-077	β3.4-thalassemia trait	β3.4/βA	αα/αα	Four bp deletion (-AGCA) in Ag-globin promoter	WT/WT	M	6.17	12.8	40.3	65.4	20.8	31.8	19.7	8.6	-
1-078	β3.4-thalassemia trait	β3.4/βA	αα/αα	Four bp deletion (-AGCA) in Ag-globin promoter	WT/WT	M	6.48	13.8	42.8	66	21.3	32.2	21.8	7.2	5.3
1-079	β3.4-thalassemia trait	β3.4/βA	αα/αα	Four bp deletion (-AGCA) in Ag-globin promoter	WT/WT	F	4.63	10.1	31	67	21.8	32.6	19.7	6.7	7.8
1-080	β3.4-thalassemia trait	β3.4/βA	αα/αα	Four bp deletion (-AGCA) in Ag-globin promoter	WT/WT	F	4.89	10.8	33	66.4	22.1	32.7	20.1	6.1	10.9
1-081	β3.4-thalassemia trait	β3.4/βA	αα/αα	Four bp deletion (-AGCA) in Ag-globin promoter	WT/WT	F	5.41	11.3	34	62.9	20.7	33.2	-	7.7	7.9
1-082	β3.4-thalassemia trait	β3.4/βA	αα/αα	Four bp deletion (-AGCA) in Ag-globin promoter	WT/WT	F	5.48	11.9	35.5	64.8	22.7	35	-	6.9	-
1-083	β3.4-thalassemia trait	β3.4/βA	αα/αα	Four bp deletion (-AGCA) in Ag-globin promoter	WT/WT	F	-	-	-	68	-	-	-	5.9	8.8
1-084	β3.4-thalassemia trait	β3.4/βA	αα/αα	Four bp deletion (-AGCA) in Ag-globin promoter	WT/-4 bp	M	6.2	13.2	39.7	64	21.4	33.2	21.7	7	6.8
2-001	β3.4-thalassemia trait	β3.4/βA	αα/αα	rs5006884 (C>T) of the OR51B6 gene	C/C	M	5.71	12	36	63	21	33.3	-	6.9	-
2-002	β3.4-thalassemia trait	β3.4/βA	αα/αα	rs5006884 (C>T) of the OR51B6 gene	C/C	M	4.69	8.8	30	64	19	29.3	-	5.4	15.7
2-003	β3.4-thalassemia trait	β3.4/βA	αα/αα	rs5006884 (C>T) of the OR51B6 gene	C/C	F	5.69	11.2	37.5	65.9	19.7	29.9	14.9	7.4	3
2-004	β3.4-thalassemia trait	β3.4/βA	αα/αα	rs5006884 (C>T) of the OR51B6 gene	C/C	M	5.32	10.3	34.2	64.4	19.3	30	22.6	7.1	11.4
2-005	β3.4-thalassemia trait	β3.4/βA	αα/αα	rs5006884 (C>T) of the OR51B6 gene	C/C	M	6.16	13.2	43.4	71	21.4	30.4	-	7.6	5.5
2-006	β3.4-thalassemia trait	β3.4/βA	αα/αα	rs5006884 (C>T) of the OR51B6 gene	C/C	M	6.28	13.9	45.2	72	22.2	30.8	15	7	4.7
2-007	β3.4-thalassemia trait	β3.4/βA	αα/αα	rs5006884 (C>T) of the OR51B6 gene	C/C	M	6.03	12.5	40.4	67	20.7	30.9	15.1	7.5	2.2
2-008	β3.4-thalassemia trait	β3.4/βA	αα/αα	rs5006884 (C>T) of the OR51B6 gene	C/C	M	7.1	14	45	63.7	19.8	31	15.9	7.3	3.9
2-009	β3.4-thalassemia trait	β3.4/βA	αα/αα	rs5006884 (C>T) of the OR51B6 gene	C/C	M	6.5	14	44.6	68.6	21.5	31.4	15.9	7.9	5.2
2-010	β3.4-thalassemia trait	β3.4/βA	αα/αα	rs5006884 (C>T) of the OR51B6 gene	C/C	F	5.6	10.9	34.7	62	19.4	31.4	16.3	6.2	8
2-011	β3.4-thalassemia trait	β3.4/βA	αα/αα	rs5006884 (C>T) of the OR51B6 gene	C/C	M	6.25	12.6	40	64	20.1	31.5	19.5	7.7	5.1
2-012	β3.4-thalassemia trait	β3.4/βA	αα/αα	rs5006884 (C>T) of the OR51B6 gene	C/C	F	4.16	8.7	26.5	66.8	22	31.5	19	7.5	5.4
2-013	β3.4-thalassemia trait	β3.4/βA	αα/αα	rs5006884 (C>T) of the OR51B6 gene	C/C	M	4.94	10.5	33.1	67	21.1	31.7	20	6.1	13.8
2-014	β3.4-thalassemia trait	β3.4/βA	αα/αα	rs5006884 (C>T) of the OR51B6 gene	C/C	F	5.04	10.9	34.3	68	21.6	31.8	18.9	6.8	7.6
2-015	β3.4-thalassemia trait	β3.4/βA	αα/αα	rs5006884 (C>T) of the OR51B6 gene	C/C	M	6.29	13.3	41.9	66	21.2	31.8	18.5	-	-
2-016	β3.4-thalassemia trait	β3.4/βA	αα/αα	rs5006884 (C>T) of the OR51B6 gene	C/C	F	4.43	8.6	27	61	19.3	31.9	20.8	6.5	5.1
2-017	β3.4-thalassemia trait	β3.4/βA	αα/αα	rs5006884 (C>T) of the OR51B6 gene	C/C	M	5.77	12.7	39.8	69	22	31.9	20.2	6.4	7.9
2-018	β3.4-thalassemia trait	β3.4/βA	αα/αα	rs5006884 (C>T) of the OR51B6 gene	C/C	F	4.74	10.5	32.8	69	22	32	20	5.7	13.1
2-019	β3.4-thalassemia trait	β3.4/βA	αα/αα	rs5006884 (C>T) of the OR51B6 gene	C/C	M	6.06	13	40.6	67	21.6	32	18	7.2	5.8
2-020	β3.4-thalassemia trait	β3.4/βA	αα/αα	rs5006884 (C>T) of the OR51B6 gene	C/C	F	4.25	9.4	29.3	69	22.2	32.1	18.9	6.3	6.7
2-021	β3.4-thalassemia trait	β3.4/βA	αα/αα	rs5006884 (C>T) of the OR51B6 gene	C/C	F	5.59	11	34.1	61	19.7	32.3	-	6.8	3.3
2-022	β3.4-thalassemia trait	β3.4/βA	αα/αα	rs5006884 (C>T) of the OR51B6 gene	C/C	F	4.79	11	34	71	23.2	32.4	20.1	7.5	3.7
2-023	β3.4-thalassemia trait	β3.4/βA	αα/αα	rs5006884 (C>T) of the OR51B6 gene	C/C	F	5.16	10.7	33	64	20.7	32.4	19.7	6.9	7.6
2-024	β3.4-thalassemia trait	β3.4/βA	αα/αα	rs5006884 (C>T) of the OR51B6 gene	C/C	M	6.27	12.9	39.5	63	20.5	32.7	19.6	7.4	7
2-025	β3.4-thalassemia trait	β3.4/βA	αα/αα	rs5006884 (C>T) of the OR51B6 gene	C/C	F	5.03	9.7	29.7	59	19.2	32.7	19.8	8	4.3
2-026	β3.4-thalassemia trait	β3.4/βA	αα/αα	rs5006884 (C>T) of the OR51B6 gene	C/C	F	4.29	9.8	30	70	22.8	32.7	20.6	7.1	3.5
2-027	β3.4-thalassemia trait	β3.4/βA	αα/αα	rs5006884 (C>T) of the OR51B6 gene	C/C	M	6.4	13.6	41.6	65	21.2	32.7	19.8	6.7	7.3
2-028	β3.4-thalassemia trait	β3.4/βA	αα/αα	rs5006884 (C>T) of the OR51B6 gene	C/C	F	4.44	9	27.5	62	20.2	32.7	20.9	7.6	7.2
2-029	β3.4-thalassemia trait	β3.4/βA	αα/αα	rs5006884 (C>T) of the OR51B6 gene	C/C	F	4.93	10.8	33	67	22	32.7	19.5	6.3	7.2
2-030	β3.4-thalassemia trait	β3.4/βA	αα/αα	rs5006884 (C>T) of the OR51B6 gene	C/C	M	6.03	12.5	38	63	20.8	32.9	22.3	7.5	6.9
2-031	β3.4-thalassemia trait	β3.4/βA	αα/αα	rs5006884 (C>T) of the OR51B6 gene	C/C	F	4.67	10.3	31.3	67	22	32.9	20.4	5.9	8.6
2-032	β3.4-thalassemia trait	β3.4/βA	αα/αα	rs5006884 (C>T) of the OR51B6 gene	C/C	M	6.98	13.1	39.8	57	18.8	32.9	21.1	7.1	2.1
2-033	β3.4-thalassemia trait	β3.4/βA	αα/αα	rs5006884 (C>T) of the OR51B6 gene	C/C	M	6.45	13.8	41.9	65	21.4	32.9	21.4	7	8.4
2-034	β3.4-thalassemia trait	β3.4/βA	αα/αα	rs5006884 (C>T) of the OR51B6 gene	C/C	M	4.88	12.4	37.6	77	25.4	33	18.4	5.1	13.5
2-035	β3.4-thalassemia trait	β3.4/βA	αα/αα	rs5006884 (C>T) of the OR51B6 gene	C/C	F	3.75	8.3	25.1	67	22.2	33.1	20.2	6.8	8.9
2-036	β3.4-thalassemia trait	β3.4/βA	αα/αα	rs5006884 (C>T) of the OR51B6 gene	C/C	F	5.18	12.5	37.8	73	22.8	33.1	-	7.3	4.9
2-037	β3.4-thalassemia trait	β3.4/βA	αα/αα	rs5006884 (C>T) of the OR51B6 gene	C/C	F	4.46	9.6	29	65	21.5	33.1	-	8.3	5.6
2-038	β3.4-thalassemia trait	β3.4/βA	αα/αα	rs5006884 (C>T) of the OR51B6 gene	C/C	M	5.86	12.3	36.9	63	21	33.3	19.6	8.6	1
2-039	β3.4-thalassemia trait	β3.4/βA	αα/αα	rs5006884 (C>T) of the OR51B6 gene	C/C	F	6.23	13.7	41.1	66	22	33.3	-	7.1	3.2
2-040	β3.4-thalassemia trait	β3.4/βA	αα/αα	rs5006884 (C>T) of the OR51B6 gene	C/C	F	-	11	33	-	-	33.3	-	6.7	7.8
2-041	β3.4-thalassemia trait	β3.4/βA	αα/αα	rs5006884 (C>T) of the OR51B6 gene	C/C	M	6.29	13.7	40.9	65	21.9	33.5	19.8	7.3	5.6
2-042	β3.4-thalassemia trait	β3.4/βA	αα/αα	rs5006884 (C>T) of the OR51B6 gene	C/C	F	5.2	10.9	32.6	62.6	21	33.5	21.2	5.7	8.9
2-043	β3.4-thalassemia trait	β3.4/βA	αα/αα	rs5006884 (C>T) of the OR51B6 gene	C/C	F	5.5	11.2	33	60	20.4	33.9	-	6.5	8.6
2-044	β3.4-thalassemia trait	β3.4/βA	αα/αα	rs5006884 (C>T) of the OR51B6 gene	C/C	M	5.5	10.5	30.8	56	19.1	34.1	21.3	7.4	8.1
2-045	β3.4-thalassemia trait	β3.4/βA	αα/αα	rs5006884 (C>T) of the OR51B6 gene	C/C	M	6.66	14.1	41.3	62	21.2	34.1	18.5	7.2	3.2
2-046	β3.4-thalassemia trait	β3.4/βA	αα/αα	rs5006884 (C>T) of the OR51B6 gene	C/C	M	5.68	12.6	36.9	65	22.1	34.1	20.3	7	5.6
2-047	β3.4-thalassemia trait	β3.4/βA	αα/αα	rs5006884 (C>T) of the OR51B6 gene	C/C	M	-	-	-	62.2	-	-	-	-	-
2-048	β3.4-thalassemia trait	β3.4/βA	αα/αα	rs5006884 (C>T) of the OR51B6 gene	C/C	M	-	-	-	63	-	-	-	7.7	2.2
2-049	β3.4-thalassemia trait	β3.4/βA	αα/αα	rs5006884 (C>T) of the OR51B6 gene	C/C	M	-	-	-	63	-	-	-	7.5	2
2-050	β3.4-thalassemia trait	β3.4/βA	αα/αα	rs5006884 (C>T) of the OR51B6 gene	C/C	F	-	-	-	66.3	-	-	-	6.5	7.2
2-051	β3.4-thalassemia trait	β3.4/βA	αα/αα	rs5006884 (C>T) of the OR51B6 gene	C/C	M	-	-	-	69	-	-	-	7.2	3.1
2-052	β3.4-thalassemia trait	β3.4/βA	αα/αα	rs5006884 (C>T) of the OR51B6 gene	C/C	F	-	-	-	69	-	-	-	-	-
2-053	β3.4-thalassemia trait	β3.4/βA	αα/αα	rs5006884 (C>T) of the OR51B6 gene	C/C	F	4.75	-	33	69.5	-	-	-	6.9	-
2-054	β3.4-thalassemia trait	β3.4/βA	αα/αα	rs5006884 (C>T) of the OR51B6 gene	C/C	M	-	-	-	70	-	-	-	6.9	3.1
2-055	β3.4-thalassemia trait	β3.4/βA	αα/αα	rs5006884 (C>T) of the OR51B6 gene	C/C	M	-	-	-	71	-	-	-	5.3	12.4
2-056	β3.4-thalassemia trait	β3.4/βA	αα/αα	rs5006884 (C>T) of the OR51B6 gene	C/C	F	-	-	40	-	-	-	-	5.9	0.5
2-057	β3.4-thalassemia trait	β3.4/βA	αα/αα	rs5006884 (C>T) of the OR51B6 gene	C/C	M	-	-	-	-	-	-	-	7.9	4.1
2-058	β3.4-thalassemia trait	β3.4/βA	αα/αα	rs5006884 (C>T) of the OR51B6 gene	C/C	M	-	-	-	-	-	-	-	7.3	3.3
2-059	β3.4-thalassemia trait	β3.4/βA	αα/αα	rs5006884 (C>T) of the OR51B6 gene	C/C	F	-	-	-	-	-	-	-	6.4	8.5
2-060	β3.4-thalassemia trait	β3.4/βA	αα/αα	rs5006884 (C>T) of the OR51B6 gene	C/C	F	-	-	-	-	-	-	-	7.6	3.7
2-061	β3.4-thalassemia trait	β3.4/βA	αα/αα	rs5006884 (C>T) of the OR51B6 gene	C/C	F	-	-	-	-	-	-	-	6.5	-
2-062	β3.4-thalassemia trait	β3.4/βA	αα/αα	rs5006884 (C>T) of the OR51B6 gene	C/C	F	-	-	-	-	-	-	-	5.4	11
2-063	β3.4-thalassemia trait	β3.4/βA	αα/αα	rs5006884 (C>T) of the OR51B6 gene	C/C	M	-	-	-	-	-	-	-	7.8	1.3
2-064	β3.4-thalassemia trait	β3.4/βA	αα/αα	rs5006884 (C>T) of the OR51B6 gene	C/C	M	-	-	-	-	-	-	-	6.6	6.5
2-065	β3.4-thalassemia trait	β3.4/βA	αα/αα	rs5006884 (C>T) of the OR51B6 gene	C/C	M	5.01	11.3	37.1	74	22.5	30.4	-	6.5	4.9
2-066	β3.4-thalassemia trait	β3.4/βA	αα/αα	rs5006884 (C>T) of the OR51B6 gene	C/C	F	5.49	11.3	36.4	66.4	20.7	31.1	18.7	6.9	-
2-067	β3.4-thalassemia trait	β3.4/βA	αα/αα	rs5006884 (C>T) of the OR51B6 gene	C/C	F	4.83	10.3	33	68.2	22.3	31.2	-	6.1	19
2-068	β3.4-thalassemia trait	β3.4/βA	αα/αα	rs5006884 (C>T) of the OR51B6 gene	C/C	M	6.01	13.3	37.5	62.4	22.1	35.5	-	6.4	3.4
2-069	β3.4-thalassemia trait	β3.4/βA	αα/αα	rs5006884 (C>T) of the OR51B6 gene	C/T	M	-	-	-	63.7	20.8	32.7	-	7.6	-
2-070	β3.4-thalassemia trait	β3.4/βA	αα/αα	rs5006884 (C>T) of the OR51B6 gene	C/T	M	-	-	-	63.7	20.8	32.7	-	7.6	-
2-071	β3.4-thalassemia trait	β3.4/βA	αα/αα	rs5006884 (C>T) of the OR51B6 gene	C/T	F	3.94	8.5	25.5	64.7	21.6	33.3	17.5	8.7	-
2-072	β3.4-thalassemia trait	β3.4/βA	αα/αα	rs5006884 (C>T) of the OR51B6 gene	C/T	F	4.13	9.7	32.2	78	23.5	30.1	-	7.1	6.7
2-073	β3.4-thalassemia trait	β3.4/βA	αα/αα	rs5006884 (C>T) of the OR51B6 gene	C/T	M	5.71	11.3	36	63	19.8	31.4	19	7.6	4.5
2-074	β3.4-thalassemia trait	β3.4/βA	αα/αα	rs5006884 (C>T) of the OR51B6 gene	C/T	M	6.17	12.8	40.3	65.4	20.8	31.8	19.7	8.6	-
2-075	β3.4-thalassemia trait	β3.4/βA	αα/αα	rs5006884 (C>T) of the OR51B6 gene	C/T	M	6.48	13.8	42.8	66	21.3	32.2	21.8	7.2	5.3
2-076	β3.4-thalassemia trait	β3.4/βA	αα/αα	rs5006884 (C>T) of the OR51B6 gene	C/T	F	4.63	10.1	31	67	21.8	32.6	19.7	6.7	7.8
2-077	β3.4-thalassemia trait	β3.4/βA	αα/αα	rs5006884 (C>T) of the OR51B6 gene	C/T	F	4.89	10.8	33	66.4	22.1	32.7	20.1	6.1	10.9
2-078	β3.4-thalassemia trait	β3.4/βA	αα/αα	rs5006884 (C>T) of the OR51B6 gene	C/T	F	5.41	11.3	34	62.9	20.7	33.2	-	7.7	7.9
2-079	β3.4-thalassemia trait	β3.4/βA	αα/αα	rs5006884 (C>T) of the OR51B6 gene	C/T	F	5.48	11.9	35.5	64.8	22.7	35	-	6.9	-
2-080	β3.4-thalassemia trait	β3.4/βA	αα/αα	rs5006884 (C>T) of the OR51B6 gene	C/T	F	-	-	-	68	-	-	-	5.9	8.8
2-081	β3.4-thalassemia trait	β3.4/βA	αα/αα	rs5006884 (C>T) of the OR51B6 gene	C/T	F	4.77	9.7	31	65	20.3	31.3	19.5	7.1	6.1
3-001	β3.4-thalassemia trait	β3.4/βA	αα/αα	Gγ-XmnI in Gg-globin promoter	C/C	F	4.16	8.7	26.5	66.8	22	31.5	19	7.5	5.4
3-002	β3.4-thalassemia trait	β3.4/βA	αα/αα	Gγ-XmnI in Gg-globin promoter	C/C	F	4.88	11.5	37	75	23.6	31.1	17.6	5.8	10.5
3-003	β3.4-thalassemia trait	β3.4/βA	αα/αα	Gγ-XmnI in Gg-globin promoter	C/C	M	-	-	-	-	-	-	-	7.9	4.1
3-004	β3.4-thalassemia trait	β3.4/βA	αα/αα	Gγ-XmnI in Gg-globin promoter	C/C	M	5.71	12	36	63	21	33.3	-	6.9	-
3-005	β3.4-thalassemia trait	β3.4/βA	αα/αα	Gγ-XmnI in Gg-globin promoter	C/C	M	5.44	12.8	40	73.5	23.5	31.8	-	6	6.8
3-006	β3.4-thalassemia trait	β3.4/βA	αα/αα	Gγ-XmnI in Gg-globin promoter	C/C	M	-	-	-	-	-	-	-	7.3	3.3
3-007	β3.4-thalassemia trait	β3.4/βA	αα/αα	Gγ-XmnI in Gg-globin promoter	C/C	M	6.17	12.8	40.3	65.4	20.8	31.8	19.7	8.6	-
3-008	β3.4-thalassemia trait	β3.4/βA	αα/αα	Gγ-XmnI in Gg-globin promoter	C/C	M	-	-	-	63.7	20.8	32.7	-	7.6	-
3-009	β3.4-thalassemia trait	β3.4/βA	αα/αα	Gγ-XmnI in Gg-globin promoter	C/C	M	-	-	-	62.2		-	-	3.6-8	-
3-010	β3.4-thalassemia trait	β3.4/βA	αα/αα	Gγ-XmnI in Gg-globin promoter	C/C	F	-	-	-	-	-	-	-	6.4	8.5
3-011	β3.4-thalassemia trait	β3.4/βA	αα/αα	Gγ-XmnI in Gg-globin promoter	C/C	F	3.94	8.5	25.5	64.7	21.6	33.3	17.5	8.7	-
3-012	β3.4-thalassemia trait	β3.4/βA	αα/αα	Gγ-XmnI in Gg-globin promoter	C/C	F	-	-	-	-	-	-	-	7.6	3.7
3-013	β3.4-thalassemia trait	β3.4/βA	αα/αα	Gγ-XmnI in Gg-globin promoter	C/C	F	5.41	11.3	34	62.9	20.7	33.2	-	7.7	7.9
3-014	β3.4-thalassemia trait	β3.4/βA	αα/αα	Gγ-XmnI in Gg-globin promoter	C/C	F	4.74	10.5	32.8	69	22	32	20	5.7	13.1
3-015	β3.4-thalassemia trait	β3.4/βA	αα/αα	Gγ-XmnI in Gg-globin promoter	C/C	F	-	-	-	69	-	-	-	-	-
3-016	β3.4-thalassemia trait	β3.4/βA	αα/αα	Gγ-XmnI in Gg-globin promoter	C/C	F	4.53	9.6	33.4	73.7	21.2	28.7	-	5.2	-
3-017	β3.4-thalassemia trait	β3.4/βA	αα/αα	Gγ-XmnI in Gg-globin promoter	C/C	F	5	10.5	33	65.9	21.2	32.2	19.5	-	-
3-018	β3.4-thalassemia trait	β3.4/βA	αα/αα	Gγ-XmnI in Gg-globin promoter	C/C	F	5.3	10.1	31	59.7	19.3	32.3	19.7	7.4	3.3
3-019	β3.4-thalassemia trait	β3.4/βA	αα/αα	Gγ-XmnI in Gg-globin promoter	C/C	F	-	-	-	66.3	-	-	-	6.5	7.2
3-020	β3.4-thalassemia trait	β3.4/βA	αα/αα	Gγ-XmnI in Gg-globin promoter	C/C	M	6.57	14.3	46	70	21.7	31.2	13.5	7	4.5
3-021	β3.4-thalassemia trait	β3.4/βA	αα/αα	Gγ-XmnI in Gg-globin promoter	C/C	F	5.2	10.9	32.6	62.6	21	33.5	21.2	5.7	8.9
3-022	β3.4-thalassemia trait	β3.4/βA	αα/αα	Gγ-XmnI in Gg-globin promoter	C/C	F	-	-	-	68	-	-	-	5.9	8.8
3-023	β3.4-thalassemia trait	β3.4/βA	αα/αα	Gγ-XmnI in Gg-globin promoter	C/C	F	4.13	9.7	32.2	78	23.5	30.1	-	7.1	6.7
3-024	β3.4-thalassemia trait	β3.4/βA	αα/αα	Gγ-XmnI in Gg-globin promoter	C/C	M	4.97	11.8	36.1	72.5	23.7	32.7	18.1	6.1	6.1
3-025	β3.4-thalassemia trait	β3.4/βA	αα/αα	Gγ-XmnI in Gg-globin promoter	C/C	M	7.23	14.7	47	65	20	31	-	7.3	3.4
3-026	β3.4-thalassemia trait	β3.4/βA	αα/αα	Gγ-XmnI in Gg-globin promoter	C/C	M	6.16	13.2	43.4	71	21.4	30.4	-	7.6	5.5
3-027	β3.4-thalassemia trait	β3.4/βA	αα/αα	Gγ-XmnI in Gg-globin promoter	C/C	M	-	-	-	70	22	31.4	-	-	-
3-028	β3.4-thalassemia trait	β3.4/βA	αα/αα	Gγ-XmnI in Gg-globin promoter	C/C	F	5.48	11.9	35.5	64.8	22.7	35	-	6.9	-
3-029	β3.4-thalassemia trait	β3.4/βA	αα/αα	Gγ-XmnI in Gg-globin promoter	C/C	M	6.3	14.4	46.9	74.4	22.8	30.7	15.2	5.1	6.1
3-030	β3.4-thalassemia trait	β3.4/βA	αα/αα	Gγ-XmnI in Gg-globin promoter	C/C	M	-	-	-	65.5	21.5	32.8	-	7.4	-
3-031	β3.4-thalassemia trait	β3.4/βA	αα/αα	Gγ-XmnI in Gg-globin promoter	C/C	F	4.75	-	33	69.5	-	-	-	6.9	-
3-032	β3.4-thalassemia trait	β3.4/βA	αα/αα	Gγ-XmnI in Gg-globin promoter	C/C	F	-	-	-	-	-	-	-	6.5	-
3-033	β3.4-thalassemia trait	β3.4/βA	αα/αα	Gγ-XmnI in Gg-globin promoter	C/C	F	5.69	11.2	37.5	65.9	19.7	29.9	14.9	7.4	3
3-034	β3.4-thalassemia trait	β3.4/βA	αα/αα	Gγ-XmnI in Gg-globin promoter	C/C	F	5.59	11	34.1	61	19.7	32.3	-	6.8	3.3
3-035	β3.4-thalassemia trait	β3.4/βA	αα/αα	Gγ-XmnI in Gg-globin promoter	C/C	M	7.1	14	45	63.7	19.8	31	15.9	7.3	3.9
3-036	β3.4-thalassemia trait	β3.4/βA	αα/αα	Gγ-XmnI in Gg-globin promoter	C/C	M	-	-	-	63.7	20.8	32.7	-	7.6	-
3-037	β3.4-thalassemia trait	β3.4/βA	αα/αα	Gγ-XmnI in Gg-globin promoter	C/C	F	-	-	-	-	-	-	-	5.4	11
3-038	β3.4-thalassemia trait	β3.4/βA	αα/αα	Gγ-XmnI in Gg-globin promoter	C/C	M	6.29	13.3	41.9	66	21.2	31.8	18.5	-	-
3-039	β3.4-thalassemia trait	β3.4/βA	αα/αα	Gγ-XmnI in Gg-globin promoter	C/C	F	4.93	10	32	65.1	20.3	31.2	18.5	7.8	6.8
3-040	β3.4-thalassemia trait	β3.4/βA	αα/αα	Gγ-XmnI in Gg-globin promoter	C/C	F	4.89	10.8	33	66.4	22.1	32.7	20.1	6.1	10.9
3-041	β3.4-thalassemia trait	β3.4/βA	αα/αα	Gγ-XmnI in Gg-globin promoter	C/C	M	-	-	-	71	-	-	-	5.3	12.4
3-042	β3.4-thalassemia trait	β3.4/βA	αα/αα	Gγ-XmnI in Gg-globin promoter	C/C	M	-	-	-	-	-	-	-	7.8	1.3
3-043	β3.4-thalassemia trait	β3.4/βA	αα/αα	Gγ-XmnI in Gg-globin promoter	C/C	F	-	-	-	67	19.2	28.7	-	6.6	-
3-044	β3.4-thalassemia trait	β3.4/βA	αα/αα	Gγ-XmnI in Gg-globin promoter	C/C	M	-	-	-	70.5	22	31.2	-	6.7	10.7
3-045	β3.4-thalassemia trait	β3.4/βA	αα/αα	Gγ-XmnI in Gg-globin promoter	C/C	M	5.66	13	39	68.9	23	33.3	20.5	-	-
3-046	β3.4-thalassemia trait	β3.4/βA	αα/αα	Gγ-XmnI in Gg-globin promoter	C/C	F	5.49	11.3	36.4	66.4	20.7	31.1	18.7	6.9	-
3-047	β3.4-thalassemia trait	β3.4/βA	αα/αα	Gγ-XmnI in Gg-globin promoter	C/C	M	6.01	13.3	37.5	62.4	22.1	35.5	-	6.4	3.4
3-048	β3.4-thalassemia trait	β3.4/βA	αα/αα	Gγ-XmnI in Gg-globin promoter	C/C	M	5.01	11.3	37.1	74	22.5	30.4	-	6.5	4.9
3-049	β3.4-thalassemia trait	β3.4/βA	αα/αα	Gγ-XmnI in Gg-globin promoter	C/C	F	4.83	10.3	33	68.2	22.3	31.2	-	6.1	19
3-050	β3.4-thalassemia trait	β3.4/βA	αα/αα	Gγ-XmnI in Gg-globin promoter	C/C	M	6.68	14.2	46	68.8	21.2	30.8	18.6	6.7	1.5
3-051	β3.4-thalassemia trait	β3.4/βA	αα/αα	Gγ-XmnI in Gg-globin promoter	C/C	M	6.46	13.2	39	60.8	20.4	33.8	20.3	7.9	3.2
3-052	β3.4-thalassemia trait	β3.4/βA	αα/αα	Gγ-XmnI in Gg-globin promoter	C/C	M	6.1	13.4	43	69.4	21.9	18.8	-	7.2	-
3-053	β3.4-thalassemia trait	β3.4/βA	αα/αα	Gγ-XmnI in Gg-globin promoter	C/T	F	-	-	40	-	-	-	-	5.9	0.5
3-054	β3.4-thalassemia trait	β3.4/βA	αα/αα	Gγ-XmnI in Gg-globin promoter	C/T	M	-	-	-	69	-	-	-	7.2	3.1
3-055	β3.4-thalassemia trait	β3.4/βA	αα/αα	Gγ-XmnI in Gg-globin promoter	C/T	M	5.32	10.3	34.2	64.4	19.3	30	22.6	7.1	11.4

## Sheet: Raw data Table 4
No.	Groups	β-genotype	β-thal mutation	α-genotype	Sex	RBC (10^12/L)	Hb (g/dL)	Hct (%)	MCV (fL)	MCH (pg)	MCHC (g/dL)	RDW (%)	Hb A2 (%)	Hb F (%)
1-001	Pure β0-thalassemia trait	β0/βA	β CD 41/42 (-TTCT)	αα/αα	M	6.49	11.3	36.3	55.9	17.4	31	16.1	5.8	0.8
1-002	Pure β0-thalassemia trait	β0/βA	β CD17 (A-T)	αα/αα	M	7.82	13.7	44.7	57.2	17.5	30.6	21	6.6	1.2
1-003	Pure β0-thalassemia trait	β0/βA	β CD17 (A-T)	αα/αα	M	6.96	12.4	40.3	57.9	17.8	30.8	15.7	6.9	0.5
1-004	Pure β0-thalassemia trait	β0/βA	β CD17 (A-T)	αα/αα	M	6.97	12.5	39.8	57.1	17.9	31.3	18.8	5.3	0.1
1-005	Pure β0-thalassemia trait	β0/βA	β CD17 (A-T)	αα/αα	M	6.68	12.1	38	56.9	18.1	31.8	-	-	-
1-006	Pure β0-thalassemia trait	β0/βA	β CD17 (A-T)	αα/αα	M	7.1	13	40.9	57.6	18.3	31.8	16.6	5.8	-
1-007	Pure β0-thalassemia trait	β0/βA	β CD 41/42 (-TTCT)	αα/αα	M	7.48	13.7	44.3	59.2	18.3	30.9	20.7	5.5	-
1-008	Pure β0-thalassemia trait	β0/βA	β CD17 (A-T)	αα/αα	M	6.31	11.6	35.6	56.4	18.4	32.6	19.4	5.7	-
1-009	Pure β0-thalassemia trait	β0/βA	β CD17 (A-T)	αα/αα	M	6.83	12.7	42.1	61.6	18.6	30.2	19	6.5	0.7
1-010	Pure β0-thalassemia trait	β0/βA	β CD 41/42 (-TTCT)	αα/αα	M	5.38	12.6	39.7	73.8	18.6	31.7	20.6	4.7	0.3
1-011	Pure β0-thalassemia trait	β0/βA	β CD 41/42 (-TTCT)	αα/αα	M	7	13	40.7	58.4	18.7	31.9	20.7	6.1	1.7
1-012	Pure β0-thalassemia trait	β0/βA	β CD17 (A-T)	αα/αα	M	6.62	12.4	38.7	58.5	18.7	32	19.5	5.2	-
1-013	Pure β0-thalassemia trait	β0/βA	β CD17 (A-T)	αα/αα	M	6.4	12	40.3	62.8	18.7	29.8	14.8	6.4	1.2
1-014	Pure β0-thalassemia trait	β0/βA	β CD17 (A-T)	αα/αα	M	7.02	13.3	39.4	56.1	18.9	33.8	20.2	5.3	2
1-015	Pure β0-thalassemia trait	β0/βA	β CD17 (A-T)	αα/αα	M	5.97	11.3	34.9	58.5	18.9	32.4	18.1	6.1	-
1-016	Pure β0-thalassemia trait	β0/βA	β CD17 (A-T)	αα/αα	M	6.83	12.9	40.2	58.9	18.9	32.1	18.1	5.9	0
1-017	Pure β0-thalassemia trait	β0/βA	β CD 41/42 (-TTCT)	αα/αα	M	6.43	12.1	38.8	60.3	18.9	31.2	17.4	6.4	0
1-018	Pure β0-thalassemia trait	β0/βA	β CD 41/42 (-TTCT)	αα/αα	M	6.75	12.8	40	59.3	19	32.1	14.1	5.5	0.8
1-019	Pure β0-thalassemia trait	β0/βA	β CD71/72 (+A)	αα/αα	M	5.82	11.1	35.4	60.7	19	31.3	17.8	5.6	1.2
1-020	Pure β0-thalassemia trait	β0/βA	β CD 41/42 (-TTCT)	αα/αα	M	5.9	11.2	35.9	60.8	19	31.2	15.5	5.3	2.2
1-021	Pure β0-thalassemia trait	β0/βA	β IVSI-1 (G-T)	αα/αα	M	6.86	13	41.8	61	19	31.1	20.5	4.8	-
1-022	Pure β0-thalassemia trait	β0/βA	β CD 41/42 (-TTCT)	αα/αα	M	6.4	12.1	39.5	61.6	19	30.7	17	5.6	1.7
1-023	Pure β0-thalassemia trait	β0/βA	β CD17 (A-T)	αα/αα	M	6.47	12.3	40	61.8	19	30.7	15.6	5.9	1.3
1-024	Pure β0-thalassemia trait	β0/βA	β CD17 (A-T)	αα/αα	M	6.48	12.4	39.3	60.6	19.1	31.6	18.8	5.4	-
1-025	Pure β0-thalassemia trait	β0/βA	β CD17 (A-T)	αα/αα	M	5.59	10.8	32.3	57.8	19.3	33.4	17.9	6.1	-
1-026	Pure β0-thalassemia trait	β0/βA	β CD 41/42 (-TTCT)	αα/αα	M	7.76	15	46.1	59.4	19.3	32.5	-	5.3	0.5
1-027	Pure β0-thalassemia trait	β0/βA	β CD 41/42 (-TTCT)	αα/αα	M	5.85	11.3	37.3	63.7	19.3	30.2	16.3	5.7	1
1-028	Pure β0-thalassemia trait	β0/βA	β CD17 (A-T)	αα/αα	M	6.85	13.3	41.2	60.1	19.4	32.3	20	5.3	0.8
1-029	Pure β0-thalassemia trait	β0/βA	β CD17 (A-T)	αα/αα	M	6.54	12.7	39.7	60.7	19.4	32	15.8	5.6	-
1-030	Pure β0-thalassemia trait	β0/βA	β CD 41/42 (-TTCT)	αα/αα	M	6.55	12.7	39.8	60.7	19.4	31.9	15.2	6.1	0.6
1-031	Pure β0-thalassemia trait	β0/βA	β CD 41/42 (-TTCT)	αα/αα	M	6.38	12.6	39	61.1	19.4	31.7	-	6.86	0.85
1-032	Pure β0-thalassemia trait	β0/βA	β CD71/72 (+A)	αα/αα	M	6.19	12	38.2	62	19.4	31.5	22.2	6.1	-
1-033	Pure β0-thalassemia trait	β0/βA	β CD 41/42 (-TTCT)	αα/αα	M	5.36	10.4	33.4	62.4	19.4	31.1	16.8	5.1	-
1-034	Pure β0-thalassemia trait	β0/βA	β CD17 (A-T)	αα/αα	M	6.35	12.3	40.6	63.9	19.4	30.3	15.5	6.2	0
1-035	Pure β0-thalassemia trait	β0/βA	β CD17 (A-T)	αα/αα	M	7.39	14.6	47.6	64.4	19.4	30	-	5.3	-
1-036	Pure β0-thalassemia trait	β0/βA	β CD17 (A-T)	αα/αα	M	6.92	13.5	38.8	56.1	19.5	34.8	20.1	5.7	-
1-037	Pure β0-thalassemia trait	β0/βA	β CD17 (A-T)	αα/αα	M	6.63	12.9	39.5	59.6	19.5	32.7	17.8	5.8	-
1-038	Pure β0-thalassemia trait	β0/βA	β CD 41/42 (-TTCT)	αα/αα	M	6.61	12.9	41.4	62.6	19.5	31.2	17.6	6	-
1-039	Pure β0-thalassemia trait	β0/βA	β CD 41/42 (-TTCT)	αα/αα	M	6.24	12.3	39.3	62.9	19.7	31.3	14.9	5.1	0
1-040	Pure β0-thalassemia trait	β0/βA	β CD17 (A-T)	αα/αα	M	6.79	13.4	42.9	63.1	19.7	31.2	16.3	5.1	1
1-041	Pure β0-thalassemia trait	β0/βA	β CD 41/42 (-TTCT)	αα/αα	M	6.4	12.5	38	59.4	19.8	33.3	-	5.5	0
1-042	Pure β0-thalassemia trait	β0/βA	β CD 41/42 (-TTCT)	αα/αα	M	6.52	12.9	39.9	61.2	19.8	32.3	18.6	5.5	1.9
1-043	Pure β0-thalassemia trait	β0/βA	β CD 41/42 (-TTCT)	αα/αα	M	6.57	13	40.2	61.2	19.8	32.3	18.4	4.5	0.5
1-044	Pure β0-thalassemia trait	β0/βA	β CD 41/42 (-TTCT)	αα/αα	M	7.31	14.3	49	67	19.8	29.5	-	5.8	-
1-045	Pure β0-thalassemia trait	β0/βA	β CD 41/42 (-TTCT)	αα/αα	M	6.22	12.4	39	63	19.9	31.7	18.1	4.8	-
1-046	Pure β0-thalassemia trait	β0/βA	β CD17 (A-T)	αα/αα	M	6.01	12	38.8	64.5	19.9	30.9	15.2	6.1	1.3
1-047	Pure β0-thalassemia trait	β0/βA	β CD 41/42 (-TTCT)	αα/αα	M	6.48	12.9	43.8	67.6	19.9	29.5	-	6.5	0.7
1-048	Pure β0-thalassemia trait	β0/βA	β CD 41/42 (-TTCT)	αα/αα	M	6.24	12.5	36	57.7	20	34.7	20.1	6.1	-
1-049	Pure β0-thalassemia trait	β0/βA	β CD 41/42 (-TTCT)	αα/αα	M	6.26	12.5	38.3	61.2	20	32.6	19.4	5.5	1.6
1-050	Pure β0-thalassemia trait	β0/βA	β CD 41/42 (-TTCT)	αα/αα	M	6.19	12.4	38	61.4	20	32.6	19.3	5.4	1.1
1-051	Pure β0-thalassemia trait	β0/βA	β CD 41/42 (-TTCT)	αα/αα	M	6.5	13	41	63.1	20	31.7	16	5.8	0.9
1-052	Pure β0-thalassemia trait	β0/βA	β CD 41/42 (-TTCT)	αα/αα	M	6.7	13.5	37.6	56.1	20.1	35.9	19.8	5.3	-
1-053	Pure β0-thalassemia trait	β0/βA	β CD 41/42 (-TTCT)	αα/αα	M	6.41	12.9	38.9	60.7	20.1	33.2	-	5.1	-
1-054	Pure β0-thalassemia trait	β0/βA	β CD17 (A-T)	αα/αα	M	6.78	13.6	42.6	62.8	20.1	31.9	15.2	6.1	-
1-055	Pure β0-thalassemia trait	β0/βA	β CD17 (A-T)	αα/αα	M	6.49	13.1	41.4	63.8	20.1	31.6	16.5	6.2	2.3
1-056	Pure β0-thalassemia trait	β0/βA	β CD17 (A-T)	αα/αα	M	5.83	11.7	37.3	64	20.1	31.3	15.1	5.5	0.9
1-057	Pure β0-thalassemia trait	β0/βA	β CD17 (A-T)	αα/αα	M	5.97	12	38.5	64.5	20.1	31.1	15.9	5.6	-
1-058	Pure β0-thalassemia trait	β0/βA	β CD 41/42 (-TTCT)	αα/αα	M	6.44	12.9	41.8	64.9	20.1	31	18.4	6.3	1.1
1-059	Pure β0-thalassemia trait	β0/βA	β CD 41/42 (-TTCT)	αα/αα	M	5.29	10.6	34.3	64.9	20.1	30.9	16.3	4.8	1.5
1-060	Pure β0-thalassemia trait	β0/βA	β CD 41/42 (-TTCT)	αα/αα	M	6.44	13	39.5	61.3	20.2	32.9	19.3	6	0.6
1-061	Pure β0-thalassemia trait	β0/βA	β CD 41/42 (-TTCT)	αα/αα	M	6.93	14	43.2	62.2	20.2	32.4	16	6.04	0.6
1-062	Pure β0-thalassemia trait	β0/βA	β CD 41/42 (-TTCT)	αα/αα	M	6.29	12.7	39.6	62.9	20.2	32.2	17.4	5.5	0.9
1-063	Pure β0-thalassemia trait	β0/βA	β CD 41/42 (-TTCT)	αα/αα	M	6	12.1	38.4	63.9	20.2	31.6	16.3	5.9	1.3
1-064	Pure β0-thalassemia trait	β0/βA	β CD 41/42 (-TTCT)	αα/αα	M	6.77	13.7	43.6	64.4	20.2	31.4	-	6.3	0.5
1-065	Pure β0-thalassemia trait	β0/βA	β CD17 (A-T)	αα/αα	M	5.84	11.8	37.9	64.8	20.2	31.1	15	5.7	1.3
1-066	Pure β0-thalassemia trait	β0/βA	β CD 41/42 (-TTCT)	αα/αα	M	5.57	11.3	37.3	67.7	20.2	29.9	15.8	5.1	3
1-067	Pure β0-thalassemia trait	β0/βA	β CD 41/42 (-TTCT)	αα/αα	M	6.26	12.7	39.9	63.7	20.3	31.8	16.2	5.9	0.6
1-068	Pure β0-thalassemia trait	β0/βA	β CD17 (A-T)	αα/αα	M	7.23	14.7	48.8	67.5	20.3	30.1	-	6.4	-
1-069	Pure β0-thalassemia trait	β0/βA	β IVSI-1 (G-T)	αα/αα	M	6.67	13.6	42.2	63.3	20.4	32.2	20.1	4.4	0.5
1-070	Pure β0-thalassemia trait	β0/βA	β CD 41/42 (-TTCT)	αα/αα	M	6.89	14.1	39.4	57.2	20.5	35.8	19.7	5.7	1.2
1-071	Pure β0-thalassemia trait	β0/βA	β CD 41/42 (-TTCT)	αα/αα	M	5.3	10.9	31.9	60.3	20.5	34.1	16.3	5.5	0.1
1-072	Pure β0-thalassemia trait	β0/βA	β CD 41/42 (-TTCT)	αα/αα	M	4.63	9.5	28	60.5	20.5	33.9	17.8	5.9	1.9
1-073	Pure β0-thalassemia trait	β0/βA	β CD71/72 (+A)	αα/αα	M	5.9	12.1	37.8	64.1	20.5	32	17.2	6.1	0.3
1-074	Pure β0-thalassemia trait	β0/βA	β CD17 (A-T)	αα/αα	M	6.22	12.8	41.3	66.3	20.5	31	17.1	5.3	0.9
1-075	Pure β0-thalassemia trait	β0/βA	β CD 41/42 (-TTCT)	αα/αα	M	5.61	11.6	34.2	61.1	20.6	33.9	16.2	6.1	1.1
1-076	Pure β0-thalassemia trait	β0/βA	β CD 41/42 (-TTCT)	αα/αα	M	6.6	13.6	41	62.1	20.6	33.2	19.7	4.2	-
1-077	Pure β0-thalassemia trait	β0/βA	β CD17 (A-T)	αα/αα	M	6.59	13.6	43.3	65.7	20.6	31.4	21.9	5.7	1.9
1-078	Pure β0-thalassemia trait	β0/βA	β CD17 (A-T)	αα/αα	M	5.45	11.2	36.1	66.2	20.6	31.6	16.4	5.8	-
1-079	Pure β0-thalassemia trait	β0/βA	β CD 41/42 (-TTCT)	αα/αα	M	6.35	13.1	42	67	20.6	-	-	6.4	0.7
1-080	Pure β0-thalassemia trait	β0/βA	β CD17 (A-T)	αα/αα	M	6.68	13.8	41.3	61.8	20.7	33.4	15.9	6	0.6
1-081	Pure β0-thalassemia trait	β0/βA	β CD 41/42 (-TTCT)	αα/αα	M	6.19	12.8	42.1	68	20.7	30.5	16.1	4.4	2
1-082	Pure β0-thalassemia trait	β0/βA	β CD17 (A-T)	αα/αα	M	6.45	13.4	40.2	62.3	20.8	33.3	20.3	5.4	0.6
1-083	Pure β0-thalassemia trait	β0/βA	β CD 41/42 (-TTCT)	αα/αα	M	7	14.6	43.8	62.3	20.8	33.3	20	6.3	-
1-084	Pure β0-thalassemia trait	β0/βA	β CD 41/42 (-TTCT)	αα/αα	M	5.84	12.1	38	65.1	20.8	31.9	16.4	6	-
1-085	Pure β0-thalassemia trait	β0/βA	β CD17 (A-T)	αα/αα	M	6.65	13.8	43.7	65.6	20.8	31.7	15.9	5.9	1.7
1-086	Pure β0-thalassemia trait	β0/βA	β CD17 (A-T)	αα/αα	M	5.93	12.4	37.8	63.7	20.9	32.8	19	5.5	-
1-087	Pure β0-thalassemia trait	β0/βA	β CD 41/42 (-TTCT)	αα/αα	M	6.63	13.9	42	63.3	21	33.1	18.9	5.5	0.5
1-088	Pure β0-thalassemia trait	β0/βA	β CD17 (A-T)	αα/αα	M	6.3	13.2	40.3	64	21	32.8	17.6	5.8	-
1-089	Pure β0-thalassemia trait	β0/βA	β CD 41/42 (-TTCT)	αα/αα	M	6.13	12.8	40.4	65.9	21	31.8	17	5.2	-
1-090	Pure β0-thalassemia trait	β0/βA	β IVSI-1 (G-T)	αα/αα	M	6.2	13	41.1	66.3	21	31.6	16.9	4.8	2.3
1-091	Pure β0-thalassemia trait	β0/βA	β IVSI-1 (G-T)	αα/αα	M	6.2	13	41.4	66.7	21	31.4	16	5.2	-
1-092	Pure β0-thalassemia trait	β0/βA	β IVSI-1 (G-T)	αα/αα	M	5.67	12	36.6	64.5	21.1	32.8	17.1	5	5.3
1-093	Pure β0-thalassemia trait	β0/βA	β CD 41/42 (-TTCT)	αα/αα	M	5.73	12.1	38.2	66.7	21.1	31.7	15.3	6.5	1.3
1-094	Pure β0-thalassemia trait	β0/βA	β CD 41/42 (-TTCT)	αα/αα	M	6.21	13.1	41.6	67	21.1	31.5	19	4.8	-
1-095	Pure β0-thalassemia trait	β0/βA	β CD 41/42 (-TTCT)	αα/αα	M	4.92	10.4	33.4	67.9	21.1	31.1	19.4	6.1	2.6
1-096	Pure β0-thalassemia trait	β0/βA	β CD17 (A-T)	αα/αα	M	6.37	13.5	43.6	68.4	21.2	31	14.3	4.8	-
1-097	Pure β0-thalassemia trait	β0/βA	β CD17 (A-T)	αα/αα	M	5.34	11.4	32.2	60.3	21.3	35.4	14.3	5.1	-
1-098	Pure β0-thalassemia trait	β0/βA	β CD 41/42 (-TTCT)	αα/αα	M	5.51	11.8	35.8	65	21.4	33	18.4	6.1	-
1-099	Pure β0-thalassemia trait	β0/βA	β CD 41/42 (-TTCT)	αα/αα	M	4.65	10	28	60.4	21.5	35.7	15.3	-	-
1-100	Pure β0-thalassemia trait	β0/βA	β CD 41/42 (-TTCT)	αα/αα	M	6.11	13.1	39.5	64.6	21.5	33.3	17	5.3	1.5
1-101	Pure β0-thalassemia trait	β0/βA	β CD 41/42 (-TTCT)	αα/αα	M	6.68	14.4	43.6	65.3	21.6	33	17.9	6.1	-
1-102	Pure β0-thalassemia trait	β0/βA	β CD 41/42 (-TTCT)	αα/αα	M	5.49	11.9	36.1	65.9	21.6	32.9	17.2	5.1	0.2
1-103	Pure β0-thalassemia trait	β0/βA	β CD 41/42 (-TTCT)	αα/αα	M	5.5	11.9	37	67.3	21.6	32.2	18.3	4.2	0.7
1-104	Pure β0-thalassemia trait	β0/βA	β CD 41/42 (-TTCT)	αα/αα	M	5.14	11.2	35	67.9	21.7	31.9	15.5	6	2.3
1-105	Pure β0-thalassemia trait	β0/βA	β CD17 (A-T)	αα/αα	M	5.87	12.9	40	68.1	21.8	32	-	5.6	0.5
1-106	Pure β0-thalassemia trait	β0/βA	β CD 41/42 (-TTCT)	αα/αα	M	6.29	13.7	43.1	68.4	21.8	31.8	15.4	5.3	0.8
1-107	Pure β0-thalassemia trait	β0/βA	β CD17 (A-T)	αα/αα	M	5.51	12.1	34.3	62.3	21.9	35.2	16.9	6.1	3
1-108	Pure β0-thalassemia trait	β0/βA	β CD 41/42 (-TTCT)	αα/αα	M	5.96	13.1	40.1	67.3	22	32.7	16.1	4.6	-
1-109	Pure β0-thalassemia trait	β0/βA	β CD 41/42 (-TTCT)	αα/αα	M	5.11	11.4	34.7	68	22.3	32.8	17.2	4.2	-
1-110	Pure β0-thalassemia trait	β0/βA	β CD 41/42 (-TTCT)	αα/αα	M	5.05	11.4	31.9	63.3	22.5	35.7	17.6	5.7	-
1-111	Pure β0-thalassemia trait	β0/βA	β CD17 (A-T)	αα/αα	M	5.75	13.3	35.4	61.6	23.1	37.5	16	4.9	0.5
1-112	Pure β0-thalassemia trait	β0/βA	β CD 41/42 (-TTCT)	αα/αα	M	5.41	12.5	34.5	63.8	23.1	36.2	16.5	5.1	1.4
1-113	Pure β0-thalassemia trait	β0/βA	β CD 41/42 (-TTCT)	αα/αα	M	5.92	13.8	35.7	60.4	23.3	38.6	14.3	6.3	0.5
1-114	Pure β0-thalassemia trait	β0/βA	β CD 41/42 (-TTCT)	αα/αα	M	-	-	-	71.1	24.2	34	-	6.5	-
1-115	Pure β0-thalassemia trait	β0/βA	β CD 41/42 (-TTCT)	αα/αα	M	4.87	11.9	34.9	71.6	24.4	-	-	5.2	0.5
1-116	Pure β0-thalassemia trait	β0/βA	β CD17 (A-T)	αα/αα	M	5.2	13.9	32.7	62.9	26.7	42.5	16.7	6.4	-
1-117	Pure β0-thalassemia trait	β0/βA	β CD 41/42 (-TTCT)	αα/αα	M	4.25	11.4	34	80	26.8	-	-	4.8	1.5
1-118	Pure β0-thalassemia trait	β0/βA	β CD17 (A-T)	αα/αα	M	3.46	9.3	25.2	72.8	26.9	36.9	15.3	7.2	0.5
1-119	Pure β0-thalassemia trait	β0/βA	β CD17 (A-T)	αα/αα	M	-	-	-	65.6	-	-	-	6.4	-
1-120	Pure β0-thalassemia trait	β0/βA	β CD 41/42 (-TTCT)	αα/αα	F	4.25	7.9	28.8	67.5	18.7	27.4	16.5	4.6	-
1-121	Pure β0-thalassemia trait	β0/βA	β CD17 (A-T)	αα/αα	F	4.41	7.4	26.3	59.7	16.7	28.1	16.5	6.7	0.9
1-122	Pure β0-thalassemia trait	β0/βA	β CD 41/42 (-TTCT)	αα/αα	F	4.48	9.7	30	67	17.9	31.3	16.5	5.6	0.4
1-123	Pure β0-thalassemia trait	β0/βA	β CD 41/42 (-TTCT)	αα/αα	F	5.87	10.9	31.4	53.4	18	33.8	22.9	4.7	0.1
1-124	Pure β0-thalassemia trait	β0/βA	β CD 41/42 (-TTCT)	αα/αα	F	6.7	12.2	38.2	57	18.2	31.9	15.2	4.9	-
1-125	Pure β0-thalassemia trait	β0/βA	β CD 41/42 (-TTCT)	αα/αα	F	5.51	10.1	31	56.3	18.3	32.6	17.2	5.5	1.3
1-126	Pure β0-thalassemia trait	β0/βA	β CD 41/42 (-TTCT)	αα/αα	F	5.7	10.4	35.2	61.8	18.3	29.7	16.5	6.1	3.5
1-127	Pure β0-thalassemia trait	β0/βA	β CD 41/42 (-TTCT)	αα/αα	F	4.95	9.1	29.8	60.2	18.4	31.7	16.7	6.2	2.1
1-128	Pure β0-thalassemia trait	β0/βA	β CD 41/42 (-TTCT)	αα/αα	F	5.75	10.6	33.4	58.1	18.4	-	-	5.7	-
1-129	Pure β0-thalassemia trait	β0/βA	β CD 41/42 (-TTCT)	αα/αα	F	5.25	9.7	30.3	57.7	18.5	32	17.4	5.7	0.5
1-130	Pure β0-thalassemia trait	β0/βA	β CD 41/42 (-TTCT)	αα/αα	F	5.76	10.7	34	59	18.5	31.6	-	6.4	1
1-131	Pure β0-thalassemia trait	β0/βA	β CD17 (A-T)	αα/αα	F	6.18	11.5	35.5	57.4	18.6	32.4	17.4	5.9	1.6
1-132	Pure β0-thalassemia trait	β0/βA	β CD 41/42 (-TTCT)	αα/αα	F	5.15	9.6	33	63	18.6	-	15.3	5.3	0.9
1-133	Pure β0-thalassemia trait	β0/βA	β CD 41/42 (-TTCT)	αα/αα	F	5.56	10.4	33	59.4	18.7	31.5	18.7	4.7	-
1-134	Pure β0-thalassemia trait	β0/βA	β IVSI-1 (G-T)	αα/αα	F	4.08	7.7	23.1	56.7	18.8	33.3	14.1	5.9	2.7
1-135	Pure β0-thalassemia trait	β0/βA	β CD17 (A-T)	αα/αα	F	5.3	9.9	31.4	59	18.8	31.7	20.8	6.2	-
1-136	Pure β0-thalassemia trait	β0/βA	β CD17 (A-T)	αα/αα	F	5.47	10.3	32.5	59.4	18.8	31.7	17.2	6.6	-
1-137	Pure β0-thalassemia trait	β0/βA	β CD17 (A-T)	αα/αα	F	4.99	9.4	30.3	60.7	18.8	31	16.2	5.9	1.6
1-138	Pure β0-thalassemia trait	β0/βA	β CD17 (A-T)	αα/αα	F	6.1	11.5	37.1	60.8	18.8	31	16.7	6.3	1.1
1-139	Pure β0-thalassemia trait	β0/βA	β CD 41/42 (-TTCT)	αα/αα	F	3.99	7.5	24.8	61.9	18.8	30.3	16.1	6.7	1
1-140	Pure β0-thalassemia trait	β0/βA	β CD 41/42 (-TTCT)	αα/αα	F	5.25	9.9	33.4	63.6	18.8	29.5	14.6	6	0.4
1-141	Pure β0-thalassemia trait	β0/βA	β CD17 (A-T)	αα/αα	F	5.41	10.2	33.8	62.5	18.9	30.2	14.7	5.9	4.4
1-142	Pure β0-thalassemia trait	β0/βA	β CD17 (A-T)	αα/αα	F	4.84	9.2	28.3	58.5	19	32.5	-	-	-
1-143	Pure β0-thalassemia trait	β0/βA	β CD 41/42 (-TTCT)	αα/αα	F	5.69	10.8	33.3	58.5	19	32.4	18.6	6	-
1-144	Pure β0-thalassemia trait	β0/βA	β CD17 (A-T)	αα/αα	F	4.73	9.2	28.4	60	19	32	16.2	6.2	1.9
1-145	Pure β0-thalassemia trait	β0/βA	β CD17 (A-T)	αα/αα	F	5.95	11.3	37.4	62.8	19	30.2	16	5.8	1.7
1-146	Pure β0-thalassemia trait	β0/βA	β CD 41/42 (-TTCT)	αα/αα	F	4.8	9.1	30.7	64	19	29.6	15.4	5.3	-
1-147	Pure β0-thalassemia trait	β0/βA	β CD 41/42 (-TTCT)	αα/αα	F	5.08	9.7	33	60	19.1	-	-	4.7	1
1-148	Pure β0-thalassemia trait	β0/βA	β CD17 (A-T)	αα/αα	F	5.56	10.6	32.5	58.5	19.1	32.6	18.7	-	-
1-149	Pure β0-thalassemia trait	β0/βA	β CD17 (A-T)	αα/αα	F	5.19	9.9	30.4	58.6	19.1	31.6	-	6	-
1-150	Pure β0-thalassemia trait	β0/βA	β CD 41/42 (-TTCT)	αα/αα	F	5.22	10	32.2	61.7	19.1	31	15.6	5.59	-
1-151	Pure β0-thalassemia trait	β0/βA	β CD 41/42 (-TTCT)	αα/αα	F	4.81	9.2	31	64.4	19.1	29.7	15.8	4.9	-
1-152	Pure β0-thalassemia trait	β0/βA	β CD17 (A-T)	αα/αα	F	4.98	9.6	29.4	59	19.3	-	-	6.6	1.7
1-153	Pure β0-thalassemia trait	β0/βA	β CD 41/42 (-TTCT)	αα/αα	F	5.18	10	31.6	61	19.3	31.6	17.9	-	-
1-154	Pure β0-thalassemia trait	β0/βA	β CD 41/42 (-TTCT)	αα/αα	F	5.1	9.9	31.3	61.3	19.3	31.5	15.3	5.4	0.6
1-155	Pure β0-thalassemia trait	β0/βA	β CD 41/42 (-TTCT)	αα/αα	F	5.04	9.7	31.8	63.1	19.3	30.5	16.2	4.9	3.3
1-156	Pure β0-thalassemia trait	β0/βA	β CD17 (A-T)	αα/αα	F	5.09	9.9	30	58.9	19.4	33	17.6	-	-
1-157	Pure β0-thalassemia trait	β0/βA	β CD 41/42 (-TTCT)	αα/αα	F	4.9	9.5	29	59.2	19.4	32.8	16.2	5.6	-
1-158	Pure β0-thalassemia trait	β0/βA	β CD 41/42 (-TTCT)	αα/αα	F	4.64	9	28.4	61	19.4	31.8	18	5.2	-
1-159	Pure β0-thalassemia trait	β0/βA	β CD 41/42 (-TTCT)	αα/αα	F	4.68	9.1	28.8	61.5	19.4	31.6	17.1	5.9	-
1-160	Pure β0-thalassemia trait	β0/βA	β CD17 (A-T)	αα/αα	F	4.07	7.9	25	61	19.4	-	-	5.5	1.1
1-161	Pure β0-thalassemia trait	β0/βA	β CD71/72 (+A)	αα/αα	F	5.28	10.3	31.1	58.9	19.5	33.1	17	7.2	-
1-162	Pure β0-thalassemia trait	β0/βA	β CD17 (A-T)	αα/αα	F	5	9.7	31	62.1	19.5	31.3	16.4	5.5	0.7
1-163	Pure β0-thalassemia trait	β0/βA	β CD17 (A-T)	αα/αα	F	5.21	10.2	30.6	58.7	19.6	-	-	7.2	2.1
1-164	Pure β0-thalassemia trait	β0/βA	β CD 41/42 (-TTCT)	αα/αα	F	4.48	8.8	27.1	60.5	19.6	32.5	16.5	5.6	-
1-165	Pure β0-thalassemia trait	β0/βA	β CD 41/42 (-TTCT)	αα/αα	F	5.41	10.6	32.9	60.8	19.6	32.2	17.8	5.6	-
1-166	Pure β0-thalassemia trait	β0/βA	β CD 41/42 (-TTCT)	αα/αα	F	4.72	9.3	27.3	57.8	19.7	34.1	17.2	-	-
1-167	Pure β0-thalassemia trait	β0/βA	β CD 41/42 (-TTCT)	αα/αα	F	5.51	11.1	32.5	58.1	19.7	33.8	-	4.6	0.2
1-168	Pure β0-thalassemia trait	β0/βA	β CD 41/42 (-TTCT)	αα/αα	F	4.82	9.5	30.6	63.5	19.7	31	16.5	4.7	1.4
1-169	Pure β0-thalassemia trait	β0/βA	β CD 41/42 (-TTCT)	αα/αα	F	5.07	10	32.2	63.5	19.7	31.1	15.7	5.2	1.1
1-170	Pure β0-thalassemia trait	β0/βA	β CD17 (A-T)	αα/αα	F	4.48	8.8	28.6	64	19.7	30.8	20.6	4.6	-
1-171	Pure β0-thalassemia trait	β0/βA	β CD71/72 (+A)	αα/αα	F	4.83	9.5	30.9	64	19.7	30.7	18	5.6	1.7
1-172	Pure β0-thalassemia trait	β0/βA	β CD17 (A-T)	αα/αα	F	4.69	9.3	28.6	61	19.8	32.5	17.1	6.6	1.2
1-173	Pure β0-thalassemia trait	β0/βA	β CD17 (A-T)	αα/αα	F	5.3	10.5	32.9	62.1	19.8	31.9	16.6	5.5	1.3
1-174	Pure β0-thalassemia trait	β0/βA	β CD 41/42 (-TTCT)	αα/αα	F	5.05	10	32.3	63.8	19.8	31	15.3	6.8	1.6
1-175	Pure β0-thalassemia trait	β0/βA	β CD17 (A-T)	αα/αα	F	5.02	10	32	64	19.8	31.1	18	6.2	-
1-176	Pure β0-thalassemia trait	β0/βA	β CD 41/42 (-TTCT)	αα/αα	F	4.63	9.2	30.5	65.7	19.8	38.1	16.1	6	1.3
1-177	Pure β0-thalassemia trait	β0/βA	β CD 41/42 (-TTCT)	αα/αα	F	4.94	9.8	31	62.7	19.8	-	-	5.8	1.5
1-178	Pure β0-thalassemia trait	β0/βA	β CD17 (A-T)	αα/αα	F	5.37	10.7	32.6	60.7	19.9	32.8	16.3	5.5	-
1-179	Pure β0-thalassemia trait	β0/βA	β CD 41/42 (-TTCT)	αα/αα	F	5.28	10.5	33	61.7	19.9	32.2	18.4	7	3.5
1-180	Pure β0-thalassemia trait	β0/βA	β CD17 (A-T)	αα/αα	F	4.85	9.7	31	63.9	19.9	31.2	-	5.9	0.5
1-181	Pure β0-thalassemia trait	β0/βA	β CD 41/42 (-TTCT)	αα/αα	F	4.43	8.8	28.3	63.9	19.9	31.1	18.1	5.5	-
1-182	Pure β0-thalassemia trait	β0/βA	β CD71/72 (+A)	αα/αα	F	4.9	9.7	32.5	66.1	19.9	30	16.4	-	-
1-183	Pure β0-thalassemia trait	β0/βA	β CD 41/42 (-TTCT)	αα/αα	F	4.68	9.3	32.7	69.9	19.9	28.4	18.9	5.7	-
1-184	Pure β0-thalassemia trait	β0/βA	β CD 41/42 (-TTCT)	αα/αα	F	4.7	9.4	29	61	20	-	-	7.4	1.4
1-185	Pure β0-thalassemia trait	β0/βA	β CD 41/42 (-TTCT)	αα/αα	F	4.23	8.5	25.9	61.3	20	32.8	15.1	5.1	0.6
1-186	Pure β0-thalassemia trait	β0/βA	β IVSI-1 (G-T)	αα/αα	F	4.26	8.5	26.5	62.2	20	32.1	21.6	5.1	-
1-187	Pure β0-thalassemia trait	β0/βA	β CD 41/42 (-TTCT)	αα/αα	F	5.28	10.5	34.6	65.5	20	30.5	15.1	6	1.7
1-188	Pure β0-thalassemia trait	β0/βA	β CD17 (A-T)	αα/αα	F	5.2	10.4	34.4	66	20	30.3	16.2	6.4	2.6
1-189	Pure β0-thalassemia trait	β0/βA	β CD17 (A-T)	αα/αα	F	4.16	8.4	24	57.7	20.1	35	14.9	5.1	0.5
1-190	Pure β0-thalassemia trait	β0/βA	β CD 41/42 (-TTCT)	αα/αα	F	4.37	8.8	27.4	62.7	20.1	32.1	15.9	6.3	1.1
1-191	Pure β0-thalassemia trait	β0/βA	β CD 41/42 (-TTCT)	αα/αα	F	5.03	10.1	31.8	63.2	20.1	31.8	16.7	6.5	-
1-192	Pure β0-thalassemia trait	β0/βA	β CD17 (A-T)	αα/αα	F	4.87	9.9	31	63.6	20.1	31.6	-	6.6	2
1-193	Pure β0-thalassemia trait	β0/βA	β CD 41/42 (-TTCT)	αα/αα	F	5.05	10.1	33.5	66.2	20.1	30.2	14.2	6.3	2.4
1-194	Pure β0-thalassemia trait	β0/βA	β CD71/72 (+A)	αα/αα	F	4.77	9.6	31.8	66.7	20.1	30.1	15	5.8	1.1
1-195	Pure β0-thalassemia trait	β0/βA	β CD17 (A-T)	αα/αα	F	5.55	11.1	37.2	67.3	20.1	29.8	18.6	4.7	-
1-196	Pure β0-thalassemia trait	β0/βA	β CD 41/42 (-TTCT)	αα/αα	F	4.66	9.4	30	65	20.2	-	16.5	5.3	2.2
1-197	Pure β0-thalassemia trait	β0/βA	β CD17 (A-T)	αα/αα	F	4.66	9.4	32	69	20.2	-	-	6	2.6
1-198	Pure β0-thalassemia trait	β0/βA	β CD 41/42 (-TTCT)	αα/αα	F	5.25	10.6	32.4	61.7	20.2	32.7	18.2	4.6	0.5
1-199	Pure β0-thalassemia trait	β0/βA	β CD 41/42 (-TTCT)	αα/αα	F	4.75	9.6	30.2	63.6	20.2	31.8	16.9	5.71	-
1-200	Pure β0-thalassemia trait	β0/βA	β CD17 (A-T)	αα/αα	F	5.41	10.9	34.5	63.8	20.2	31.6	17.9	5.7	1.1
1-201	Pure β0-thalassemia trait	β0/βA	β CD 41/42 (-TTCT)	αα/αα	F	5.05	10.2	32.3	64	20.2	31.6	15.2	5.8	0.5
1-202	Pure β0-thalassemia trait	β0/βA	β CD 41/42 (-TTCT)	αα/αα	F	4.71	9.5	30.9	65.6	20.2	30.7	15.3	5.8	0.5
1-203	Pure β0-thalassemia trait	β0/βA	β CD17 (A-T)	αα/αα	F	5.4	11	32	59.3	20.4	34.5	-	5.4	1.5
1-204	Pure β0-thalassemia trait	β0/βA	β CD17 (A-T)	αα/αα	F	5.73	11	34	59.3	20.4	34.5	-	5.4	1.5
1-205	Pure β0-thalassemia trait	β0/βA	β CD 41/42 (-TTCT)	αα/αα	F	5.5	11.2	33.6	61.1	20.4	33.3	17	5.1	0.6
1-206	Pure β0-thalassemia trait	β0/βA	β CD 41/42 (-TTCT)	αα/αα	F	4.5	9.2	28.3	62.9	20.4	32.5	16.6	5.2	-
1-207	Pure β0-thalassemia trait	β0/βA	β CD17 (A-T)	αα/αα	F	4.8	9.8	30.4	63.3	20.4	32.1	16.1	4.8	0.7
1-208	Pure β0-thalassemia trait	β0/βA	β CD 41/42 (-TTCT)	αα/αα	F	4.86	9.9	31.3	64.4	20.4	31.6	15.9	4.7	1.3
1-209	Pure β0-thalassemia trait	β0/βA	β CD 41/42 (-TTCT)	αα/αα	F	4.82	9.9	31.9	66.1	20.4	30.9	14.6	5.4	0
1-210	Pure β0-thalassemia trait	β0/βA	β CD 41/42 (-TTCT)	αα/αα	F	5.11	10.5	32.3	63.2	20.5	32.5	18.3	5.2	-
1-211	Pure β0-thalassemia trait	β0/βA	β CD17 (A-T)	αα/αα	F	5.16	10.6	34.5	66.9	20.5	30.7	15.2	5.7	0.3
1-212	Pure β0-thalassemia trait	β0/βA	β CD 41/42 (-TTCT)	αα/αα	F	5.56	11.4	37.4	67.2	20.5	30.5	15.2	5.4	0.8
1-213	Pure β0-thalassemia trait	β0/βA	β CD17 (A-T)	αα/αα	F	4.92	10.1	31	63	20.5	-	-	6	-
1-214	Pure β0-thalassemia trait	β0/βA	β CD 41/42 (-TTCT)	αα/αα	F	3.73	7.7	23.8	63.9	20.6	32.3	16.5	5.2	2.5
1-215	Pure β0-thalassemia trait	β0/βA	β CD17 (A-T)	αα/αα	F	5.61	11.6	36.1	64.2	20.6	32.1	16.6	6.4	3
1-216	Pure β0-thalassemia trait	β0/βA	β CD 41/42 (-TTCT)	αα/αα	F	4.9	10.1	32.9	67.1	20.6	30.7	-	7.2	0.9
1-217	Pure β0-thalassemia trait	β0/βA	β CD 41/42 (-TTCT)	αα/αα	F	4.96	10.1	33	66.5	20.7	31.1	18	5.7	3.8
1-218	Pure β0-thalassemia trait	β0/βA	β CD 41/42 (-TTCT)	αα/αα	F	5.2	10.8	33.2	62.8	20.8	32.5	15.9	6	0.8
1-219	Pure β0-thalassemia trait	β0/βA	β CD 41/42 (-TTCT)	αα/αα	F	5.38	11.2	35	65	20.8	-	-	6.3	0.5
1-220	Pure β0-thalassemia trait	β0/βA	β CD17 (A-T)	αα/αα	F	4	8.3	27.6	69	20.8	30.1	13.9	5.9	-
1-221	Pure β0-thalassemia trait	β0/βA	β CD 41/42 (-TTCT)	αα/αα	F	4.73	9.9	27.6	58.4	20.9	35.9	21.9	7	-
1-222	Pure β0-thalassemia trait	β0/βA	β CD 41/42 (-TTCT)	αα/αα	F	3.92	8.2	23.2	59.2	20.9	35.3	17.3	5.9	-
1-223	Pure β0-thalassemia trait	β0/βA	β CD17 (A-T)	αα/αα	F	5.41	11.3	34.8	64.1	20.9	32.6	15.7	6.2	2.1
1-224	Pure β0-thalassemia trait	β0/βA	β CD 41/42 (-TTCT)	αα/αα	F	5.64	11.8	37.1	65.8	20.9	31.7	17	5.7	0.7
1-225	Pure β0-thalassemia trait	β0/βA	β CD 41/42 (-TTCT)	αα/αα	F	4.93	10.3	33.8	68.6	20.9	30.5	16.2	5.8	1.1
1-226	Pure β0-thalassemia trait	β0/βA	β CD 41/42 (-TTCT)	αα/αα	F	4.58	9.6	29.8	65	21	-	-	5.4	-
1-227	Pure β0-thalassemia trait	β0/βA	β CD71/72 (+A)	αα/αα	F	4.6	9.6	29	63	21	-	-	4.4	0.5
1-228	Pure β0-thalassemia trait	β0/βA	β CD 41/42 (-TTCT)	αα/αα	F	5	10.5	32.1	64.2	21	32.7	19.3	-	-
1-229	Pure β0-thalassemia trait	β0/βA	β CD17 (A-T)	αα/αα	F	4.85	10.2	31.9	65.7	21	31.9	14.5	-	-
1-230	Pure β0-thalassemia trait	β0/βA	β CD 41/42 (-TTCT)	αα/αα	F	5.28	11	35.2	66.7	21	31.4	15.8	5.9	5
1-231	Pure β0-thalassemia trait	β0/βA	β CD 41/42 (-TTCT)	αα/αα	F	4.6	9.8	29.7	64.4	21.3	33	-	5.8	1
1-232	Pure β0-thalassemia trait	β0/βA	β CD71/72 (+A)	αα/αα	F	5.18	11.1	32.9	63.5	21.4	33.7	17.7	5.3	-
1-233	Pure β0-thalassemia trait	β0/βA	β CD17 (A-T)	αα/αα	F	5.34	10.7	35	65.5	21.5	32.8	-	6.32	0.6
1-234	Pure β0-thalassemia trait	β0/βA	β CD 41/42 (-TTCT)	αα/αα	F	4.66	10	30.7	65.9	21.5	32.6	15.6	5.3	-
1-235	Pure β0-thalassemia trait	β0/βA	β CD17 (A-T)	αα/αα	F	5.7	10.9	34.9	68.8	21.5	31.2	-	5.2	-
1-236	Pure β0-thalassemia trait	β0/βA	β CD17 (A-T)	αα/αα	F	4.63	10	30.1	65	21.6	33.2	17.6	5.6
1-237	Pure β0-thalassemia trait	β0/βA	β CD17 (A-T)	αα/αα	F	4.57	9.9	31.2	68.2	21.6	31.6	15.7	4.6	1.3
1-238	Pure β0-thalassemia trait	β0/βA	β CD 41/42 (-TTCT)	αα/αα	F	3.81	11	24	63	21.7	32	-	5.9	-
1-239	Pure β0-thalassemia trait	β0/βA	β CD 41/42 (-TTCT)	αα/αα	F	4.52	9.8	30.5	67	21.7	32.1	20.8	5.8	-
1-240	Pure β0-thalassemia trait	β0/βA	β CD71/72 (+A)	αα/αα	F	4.99	10.9	30.8	61.7	21.8	35.4	14.7	5.7	-
1-241	Pure β0-thalassemia trait	β0/βA	β CD17 (A-T)	αα/αα	F	5.8	12.6	38	65.5	21.8	33.3	14.9	6.4	2.6
1-242	Pure β0-thalassemia trait	β0/βA	β CD17 (A-T)	αα/αα	F	5.21	11.4	32.6	62.6	21.9	35	14.2	6.1	3.3
1-243	Pure β0-thalassemia trait	β0/βA	β CD 41/42 (-TTCT)	αα/αα	F	5.54	12.2	40.3	72.6	22	30.3	16.1	6.1	0.7
1-244	Pure β0-thalassemia trait	β0/βA	β CD17 (A-T)	αα/αα	F	4.68	10.3	31	67	22	-	-	6.2	2.3
1-245	Pure β0-thalassemia trait	β0/βA	β CD 41/42 (-TTCT)	αα/αα	F	4.35	9.6	30	69	22.1	32	17.6	5.8	2.9
1-246	Pure β0-thalassemia trait	β0/βA	β CD 41/42 (-TTCT)	αα/αα	F	4.09	9.1	25.2	61.7	22.2	36.1	17	5.7	-
1-247	Pure β0-thalassemia trait	β0/βA	β CD 41/42 (-TTCT)	αα/αα	F	3.56	7.9	23.6	66.3	22.2	33.5	16.5	5.9	1.2
1-248	Pure β0-thalassemia trait	β0/βA	β CD 41/42 (-TTCT)	αα/αα	F	5.23	11.7	37.1	70.9	22.4	31.6	16.3	5.8	2
1-249	Pure β0-thalassemia trait	β0/βA	β CD 41/42 (-TTCT)	αα/αα	F	4.22	9.5	28.2	67	22.5	33.6	15	5.4	4
1-250	Pure β0-thalassemia trait	β0/βA	β CD 41/42 (-TTCT)	αα/αα	F	4.78	10.9	29.2	61.2	22.8	37.3	17.1	5.6	-
1-251	Pure β0-thalassemia trait	β0/βA	β CD17 (A-T)	αα/αα	F	4.35	9.9	30.5	70.1	22.9	32.6	15.4	4.9	1.6
1-252	Pure β0-thalassemia trait	β0/βA	β CD 41/42 (-TTCT)	αα/αα	F	4.99	11.6	35.6	71.4	23.2	32.5	15.4	6.5	0.7
1-253	Pure β0-thalassemia trait	β0/βA	β CD 41/42 (-TTCT)	αα/αα	F	-	-	-	60.8	-	-	-	6.1	-
1-254	Pure β0-thalassemia trait	β0/βA	β CD71/72 (+A)	αα/αα	F	-	-	-	62	-	-	-	6.2	-
1-255	Pure β0-thalassemia trait	β0/βA	β CD17 (A-T)	αα/αα	F	-	-	-	64	-	-	-	5.9	-
1-256	Pure β0-thalassemia trait	β0/βA	β CD 41/42 (-TTCT)	αα/αα	F	-	-	-	67	-	-	-	7.4	-
1-257	Pure β0-thalassemia trait	β0/βA	β CD 41/42 (-TTCT)	αα/αα	F	4.3	-	29	67.5	-	-	-	4.7	-
1-258	Pure β0-thalassemia trait	β0/βA	β CD71/72 (+A)	αα/αα	F	-	-	-	68.9	-	-	-	6.5	-
1-259	Pure β0-thalassemia trait	β0/βA	β CD 41/42 (-TTCT)	αα/αα	F	4	-	32	80	-	-	-	6.7	1.2
2-001	Pure β+-thalassemia trait	β+/βA	β NT-28 (A-G)	αα/αα	M	5.29	12.5	37.3	70.5	23.6	33.5	15.5	6.4	1.4
2-002	Pure β+-thalassemia trait	β+/βA	β NT-28 (A-G)	αα/αα	M	5.65	12.7	37.5	66.4	22.5	33.8	15.9	5.3	1
2-003	Pure β+-thalassemia trait	β+/βA	β NT-28 (A-G)	αα/αα	M	5.83	12.8	41	69.5	22	31.6	17.4	6	1
2-004	Pure β+-thalassemia trait	β+/βA	β NT-28 (A-G)	αα/αα	M	5.64	13.1	39.7	70.4	23.2	33	17	6.2	0.5
2-005	Pure β+-thalassemia trait	β+/βA	β NT-28 (A-G)	αα/αα	M	6.25	13.2	39.4	63	21.1	33.5	16.5	5.9	0.7
2-006	Pure β+-thalassemia trait	β+/βA	β NT-28 (A-G)	αα/αα	M	5.98	13.2	42.2	70.6	22.1	31.3	16.1	6.5	0.8
2-007	Pure β+-thalassemia trait	β+/βA	β NT-28 (A-G)	αα/αα	M	5.08	13.3	35.5	69.9	26.1	37.4	16.2	5.2	-
2-008	Pure β+-thalassemia trait	β+/βA	β NT-28 (A-G)	αα/αα	M	6.14	13.4	42.9	69.9	21.8	31.2	18	6.1	2.9
2-009	Pure β+-thalassemia trait	β+/βA	β NT-28 (A-G)	αα/αα	M	5	13.4	40.6	81.9	27	33	-	5	-
2-010	Pure β+-thalassemia trait	β+/βA	β NT-28 (A-G)	αα/αα	M	6.48	13.5	41.4	63.9	20.8	32.6	19	5.8	0.9
2-011	Pure β+-thalassemia trait	β+/βA	β NT-28 (A-G)	αα/αα	M	6.02	13.6	41.8	69.4	22.6	32.5	17.8	5.8	1.1
2-012	Pure β+-thalassemia trait	β+/βA	β NT-28 (A-G)	αα/αα	M	5.86	13.8	41.7	71	23.6	33.2	20.4	6.8	-
2-013	Pure β+-thalassemia trait	β+/βA	β NT-28 (A-G)	αα/αα	M	6.15	14	44.9	73	23.6	32	15.3	6.5	1.7
2-014	Pure β+-thalassemia trait	β+/βA	β NT-28 (A-G)	αα/αα	M	-	14	-	64.4	-	-	-	5.5	2.9
2-015	Pure β+-thalassemia trait	β+/βA	β NT-28 (A-G)	αα/αα	M	6.57	14.2	45.8	69.7	31.6	31	18	5.9	1.4
2-016	Pure β+-thalassemia trait	β+/βA	β NT-28 (A-G)	αα/αα	M	6.6	14.5	44.8	67.7	22	32.4	15.2	5.7	-
2-017	Pure β+-thalassemia trait	β+/βA	β NT-28 (A-G)	αα/αα	M	6.63	14.9	45.7	69	22.5	32.6	20.3	6.2	-
2-018	Pure β+-thalassemia trait	β+/βA	β NT-28 (A-G)	αα/αα	M	6.67	15	45.5	68.2	22.5	33	18.2	6.2	0.4
2-019	Pure β+-thalassemia trait	β+/βA	β NT-28 (A-G)	αα/αα	M	6.36	15.1	47.4	74.5	23.7	31.8	15.2	5.6	1.8
2-020	Pure β+-thalassemia trait	β+/βA	β NT-28 (A-G)	αα/αα	M	6.71	15.2	47.5	70.8	22.7	32	17.4	6.1	-
2-021	Pure β+-thalassemia trait	β+/βA	β NT-28 (A-G)	αα/αα	M	6.56	15.5	45.7	69.7	23.6	33.9	15.8	4.4	0.7
2-022	Pure β+-thalassemia trait	β+/βA	β NT-28 (A-G)	αα/αα	M	6.59	15.9	48	73	24.2	33.2	18.7	6.6	-
2-023	Pure β+-thalassemia trait	β+/βA	β NT-28 (A-G)	αα/αα	M	-	-	-	72	-	-	-	6.2	-
2-024	Pure β+-thalassemia trait	β+/βA	β NT-28 (A-G)	αα/αα	M	-	-	-	63	-	-	-	5.7	0.6
2-025	Pure β+-thalassemia trait	β+/βA	β NT-28 (A-G)	αα/αα	M	-	-	-	-	-	-	-	5.6	0.5
2-026	Pure β+-thalassemia trait	β+/βA	β NT-28 (A-G)	αα/αα	M	-	-	-	-	-	-	-	6.5	0.8
2-027	Pure β+-thalassemia trait	β+/βA	β NT-28 (A-G)	αα/αα	M	-	-	-	-	-	-	-	6.5	0.7
2-028	Pure β+-thalassemia trait	β+/βA	β NT-28 (A-G)	αα/αα	M	5.65		39	69				6.9	2.3
2-029	Pure β+-thalassemia trait	β+/βA	β NT-28 (A-G)	αα/αα	M	-	-	-	-	-	-	-	6.3	-
2-030	Pure β+-thalassemia trait	β+/βA	β NT-28 (A-G)	αα/αα	M	-	-	-	65.4	-	-	-	6.2	-
2-031	Pure β+-thalassemia trait	β+/βA	β NT-28 (A-G)	αα/αα	M	5.69	14.9	38.2	67.2	26.1	39	16.9	6.3	-
2-032	Pure β+-thalassemia trait	β+/βA	β NT-28 (A-G)	αα/αα	M	5.76	12.5	38	66	21.3	32.3		5.9	0.5
2-033	Pure β+-thalassemia trait	β+/βA	β NT-28 (A-G)	αα/αα	M	-	-	-	-	-	-	-	6	2.6
2-034	Pure β+-thalassemia trait	β+/βA	β NT-28 (A-G)	αα/αα	M	6.62	14.3	43.1	65.1	21.6	33.2	15.1	6	-
2-035	Pure β+-thalassemia trait	β+/βA	β NT-28 (A-G)	αα/αα	M	5.36	13.5	41.5	77.4	25.2	32.5	15.6	6.4	-
2-036	Pure β+-thalassemia trait	β+/βA	β NT-28 (A-G)	αα/αα	M	6.1	13.7	41.6	68.3	22.4	32.9	15.7	4.7	1.3
2-037	Pure β+-thalassemia trait	β+/βA	β NT-28 (A-G)	αα/αα	M	5.39	11	39.1	72.7	20.4	28.1	13.2	5.8	0.7
2-038	Pure β+-thalassemia trait	β+/βA	β NT-28 (A-G)	αα/αα	M	5.96	13.8	44	73.8	23.2	31.4	-	5.3	0.5
2-039	Pure β+-thalassemia trait	β+/βA	β NT-28 (A-G)	αα/αα	M	5.8	13.6	42	72.4	23.4	32.4	-	6.4	0.5
2-040	Pure β+-thalassemia trait	β+/βA	β NT-28 (A-G)	αα/αα	M	6.21	14.1	44	70.8	23.4	32	-	5.9	-
2-041	Pure β+-thalassemia trait	β+/βA	β NT-28 (A-G)	αα/αα	F	3.72	8.2	25	67.2	22	32.7	17.3	5.7	-
2-042	Pure β+-thalassemia trait	β+/βA	β NT-28 (A-G)	αα/αα	F	4.08	9.3	29.3	72	22.7	31.7	14.2	5	2.7
2-043	Pure β+-thalassemia trait	β+/βA	β NT-28 (A-G)	αα/αα	F	4.18	9.5	28.7	68.6	22.6	33.1	-	6.3	1.6
2-044	Pure β+-thalassemia trait	β+/βA	β NT-28 (A-G)	αα/αα	F	4.67	9.8	32.9	70.4	21	29.8	16.1	6.6	-
2-045	Pure β+-thalassemia trait	β+/βA	β NT-28 (A-G)	αα/αα	F	4.74	10.1	32.3	68	21.3	31.3	16.8	5.8	1.5
2-046	Pure β+-thalassemia trait	β+/βA	β NT-28 (A-G)	αα/αα	F	4.42	10.4	32	72.6	23.5	32.4	16.4	4.5	-
2-047	Pure β+-thalassemia trait	β+/βA	β NT-28 (A-G)	αα/αα	F	4.05	10.5	32.7	80.7	25.9	32.1	14.3	5.7	-
2-048	Pure β+-thalassemia trait	β+/βA	β NT-28 (A-G)	αα/αα	F	4.4	10.6	34.4	78.2	24.1	30.8	17.1	6.4	0.5
2-049	Pure β+-thalassemia trait	β+/βA	β NT-28 (A-G)	αα/αα	F	4.59	11.3	35	76	24.6	-	13.5	6.3	2
2-050	Pure β+-thalassemia trait	β+/βA	β NT-28 (A-G)	αα/αα	F	5.03	11.5	34.3	68.2	22.9	33.5	16.8	4.8	-
2-051	Pure β+-thalassemia trait	β+/βA	β NT-28 (A-G)	αα/αα	F	5	11.6	36.6	73	23.2	31.6	23.1	5.6	-
2-052	Pure β+-thalassemia trait	β+/βA	β NT-28 (A-G)	αα/αα	F	5.46	11.7	36.3	66.5	21.5	32.3	15.3	6.4	0.5
2-053	Pure β+-thalassemia trait	β+/βA	β NT-28 (A-G)	αα/αα	F	5.53	11.7	37.1	67	21.2	31.7	16	5.9	-
2-054	Pure β+-thalassemia trait	β+/βA	β NT-28 (A-G)	αα/αα	F	5.66	11.8	36.8	65	20.8	32.1	17	6.4	2.2
2-055	Pure β+-thalassemia trait	β+/βA	β NT-28 (A-G)	αα/αα	F	4.81	11.9	37	76.9	24.8	32.2	15.8	4.8	-
2-056	Pure β+-thalassemia trait	β+/βA	β NT-28 (A-G)	αα/αα	F	4.36	12.1	34.1	78.3	27.7	35.3	15	7	1.8
2-057	Pure β+-thalassemia trait	β+/βA	β NT-28 (A-G)	αα/αα	F	5.1	12.1	38.6	75.7	23.7	31.3	19.6	5.7	-
2-058	Pure β+-thalassemia trait	β+/βA	β NT-28 (A-G)	αα/αα	F	-	-	-	80.9	-	-	-	4	-
2-059	Pure β+-thalassemia trait	β+/βA	β NT-28 (A-G)	αα/αα	F	-	-	-	-	-	-	-	6.2	0.5
2-060	Pure β+-thalassemia trait	β+/βA	β NT-28 (A-G)	αα/αα	F	-	-	-	-	-	-	-	6.3	0.5
2-061	Pure β+-thalassemia trait	β+/βA	β NT-28 (A-G)	αα/αα	F	-	-	-	63.8	-	-	-	6.1	-
2-062	Pure β+-thalassemia trait	β+/βA	β NT-28 (A-G)	αα/αα	F	-	-	-	-	-	-	-	5.2	-
2-063	Pure β+-thalassemia trait	β+/βA	β NT-28 (A-G)	αα/αα	F	-	-	-	-	-	-	-	5.9	-
2-064	Pure β+-thalassemia trait	β+/βA	β NT-28 (A-G)	αα/αα	F	-	-	-	-	-	-	-	6	-
2-065	Pure β+-thalassemia trait	β+/βA	β NT-28 (A-G)	αα/αα	F	5.17	12.1	38	73.5	23.5	31.9	15.4	5.8	2.9
2-066	Pure β+-thalassemia trait	β+/βA	β NT-28 (A-G)	αα/αα	F	5.18	10.8	35.3	68.2	20.8	30.5	15.5	5	2.1
2-067	Pure β+-thalassemia trait	β+/βA	β NT-28 (A-G)	αα/αα	F	4.88	10.3	32.3	66	21.1	31.9	19.1	6.6	3.2
2-068	Pure β+-thalassemia trait	β+/βA	β NT-28 (A-G)	αα/αα	F	4.62	12.8	33.1	71.7	27.7	38.6	16.1	6.2	0.5
2-069	Pure β+-thalassemia trait	β+/βA	β NT-28 (A-G)	αα/αα	F	4.48	10.7	32.1	71.7	23.9	33.3	17	5.5	4
2-070	Pure β+-thalassemia trait	β+/βA	β NT-28 (A-G)	αα/αα	F	5.05	11.2	35.3	69.9	22.1	-	-	5.4	2.5
3-001	Pure β3.4-thalassemia trait	β3.4/βA	β 3.4 kb deletion	αα/αα	M	6.2	13.2	39.7	64	21.4	33.2	21.7	7	6.8
3-002	Pure β3.4-thalassemia trait	β3.4/βA	β 3.4 kb deletion	αα/αα	M	5.71	12	36	63	21	33.3	-	6.9	-
3-003	Pure β3.4-thalassemia trait	β3.4/βA	β 3.4 kb deletion	αα/αα	M	-	-	-	63.7	20.8	32.7	-	7.6	-
3-004	Pure β3.4-thalassemia trait	β3.4/βA	β 3.4 kb deletion	αα/αα	M	-	-	-	63.7	20.8	32.7	-	7.6	-
3-005	Pure β3.4-thalassemia trait	β3.4/βA	β 3.4 kb deletion	αα/αα	F	3.94	8.5	25.5	64.7	21.6	33.3	17.5	8.7	-
3-006	Pure β3.4-thalassemia trait	β3.4/βA	β 3.4 kb deletion	αα/αα	F	4.93	10	32	65.1	20.3	31.2	18.5	7.8	6.8
3-007	Pure β3.4-thalassemia trait	β3.4/βA	β 3.4 kb deletion	αα/αα	M	6.57	14.3	46	70	21.7	31.2	13.5	7	4.5
3-008	Pure β3.4-thalassemia trait	β3.4/βA	β 3.4 kb deletion	αα/αα	M	-	-	-	70	22	31.4	-	-	-
3-009	Pure β3.4-thalassemia trait	β3.4/βA	β 3.4 kb deletion	αα/αα	M	-	14.1	43	-	-	32.8	-	7.5	7
3-010	Pure β3.4-thalassemia trait	β3.4/βA	β 3.4 kb deletion	αα/αα	M	-	-	-	65.5	21.5	32.8	-	7.4	-
3-011	Pure β3.4-thalassemia trait	β3.4/βA	β 3.4 kb deletion	αα/αα	M	6.17	13.4	40.7	66	21.7	32.9	20.5	6.7	7.1
3-012	Pure β3.4-thalassemia trait	β3.4/βA	β 3.4 kb deletion	αα/αα	F	5.76	11.4	34	59	19.9	33.5	21.1	6.4	9.3
3-013	Pure β3.4-thalassemia trait	β3.4/βA	β 3.4 kb deletion	αα/αα	F	4.69	10.3	30.5	65	21.8	33.8	18.1	7.9	5.7
3-014	Pure β3.4-thalassemia trait	β3.4/βA	β 3.4 kb deletion	αα/αα	M	6.46	14.4	42	65	22.4	34.3	19.3	7	3.5
3-015	Pure β3.4-thalassemia trait	β3.4/βA	β 3.4 kb deletion	αα/αα	M	-	-	-	60	-	-	-	7.7	2
3-016	Pure β3.4-thalassemia trait	β3.4/βA	β 3.4 kb deletion	αα/αα	F	-	-	-	67	19.2	28.7	-	6.6	-
3-017	Pure β3.4-thalassemia trait	β3.4/βA	β 3.4 kb deletion	αα/αα	M	4.69	8.8	30	64	19	29.3	-	5.4	15.7
3-018	Pure β3.4-thalassemia trait	β3.4/βA	β 3.4 kb deletion	αα/αα	F	5.69	11.2	37.5	65.9	19.7	29.9	14.9	7.4	3
3-019	Pure β3.4-thalassemia trait	β3.4/βA	β 3.4 kb deletion	αα/αα	M	5.32	10.3	34.2	64.4	19.3	30	22.6	7.1	11.4
3-020	Pure β3.4-thalassemia trait	β3.4/βA	β 3.4 kb deletion	αα/αα	M	6.16	13.2	43.4	71	21.4	30.4	-	7.6	5.5
3-021	Pure β3.4-thalassemia trait	β3.4/βA	β 3.4 kb deletion	αα/αα	M	6.28	13.9	45.2	72	22.2	30.8	15	7	4.7
3-022	Pure β3.4-thalassemia trait	β3.4/βA	β 3.4 kb deletion	αα/αα	M	6.03	12.5	40.4	67	20.7	30.9	15.1	7.5	2.2
3-023	Pure β3.4-thalassemia trait	β3.4/βA	β 3.4 kb deletion	αα/αα	M	7.1	14	45	63.7	19.8	31	15.9	7.3	3.9
3-024	Pure β3.4-thalassemia trait	β3.4/βA	β 3.4 kb deletion	αα/αα	M	6.5	14	44.6	68.6	21.5	31.4	15.9	7.9	5.2
3-025	Pure β3.4-thalassemia trait	β3.4/βA	β 3.4 kb deletion	αα/αα	F	5.6	10.9	34.7	62	19.4	31.4	16.3	6.2	8
3-026	Pure β3.4-thalassemia trait	β3.4/βA	β 3.4 kb deletion	αα/αα	M	6.25	12.6	40	64	20.1	31.5	19.5	7.7	5.1
3-027	Pure β3.4-thalassemia trait	β3.4/βA	β 3.4 kb deletion	αα/αα	F	4.16	8.7	26.5	66.8	22	31.5	19	7.5	5.4
3-028	Pure β3.4-thalassemia trait	β3.4/βA	β 3.4 kb deletion	αα/αα	M	4.94	10.5	33.1	67	21.1	31.7	20	6.1	13.8
3-029	Pure β3.4-thalassemia trait	β3.4/βA	β 3.4 kb deletion	αα/αα	F	5.04	10.9	34.3	68	21.6	31.8	18.9	6.8	7.6
3-030	Pure β3.4-thalassemia trait	β3.4/βA	β 3.4 kb deletion	αα/αα	M	6.29	13.3	41.9	66	21.2	31.8	18.5	-	-
3-031	Pure β3.4-thalassemia trait	β3.4/βA	β 3.4 kb deletion	αα/αα	F	4.43	8.6	27	61	19.3	31.9	20.8	6.5	5.1
3-032	Pure β3.4-thalassemia trait	β3.4/βA	β 3.4 kb deletion	αα/αα	M	5.77	12.7	39.8	69	22	31.9	20.2	6.4	7.9
3-033	Pure β3.4-thalassemia trait	β3.4/βA	β 3.4 kb deletion	αα/αα	F	4.74	10.5	32.8	69	22	32	20	5.7	13.1
3-034	Pure β3.4-thalassemia trait	β3.4/βA	β 3.4 kb deletion	αα/αα	M	6.06	13	40.6	67	21.6	32	18	7.2	5.8
3-035	Pure β3.4-thalassemia trait	β3.4/βA	β 3.4 kb deletion	αα/αα	F	4.25	9.4	29.3	69	22.2	32.1	18.9	6.3	6.7
3-036	Pure β3.4-thalassemia trait	β3.4/βA	β 3.4 kb deletion	αα/αα	F	5.59	11	34.1	61	19.7	32.3	-	6.8	3.3
3-037	Pure β3.4-thalassemia trait	β3.4/βA	β 3.4 kb deletion	αα/αα	F	4.79	11	34	71	23.2	32.4	20.1	7.5	3.7
3-038	Pure β3.4-thalassemia trait	β3.4/βA	β 3.4 kb deletion	αα/αα	F	5.16	10.7	33	64	20.7	32.4	19.7	6.9	7.6
3-039	Pure β3.4-thalassemia trait	β3.4/βA	β 3.4 kb deletion	αα/αα	M	6.27	12.9	39.5	63	20.5	32.7	19.6	7.4	7
3-040	Pure β3.4-thalassemia trait	β3.4/βA	β 3.4 kb deletion	αα/αα	F	5.03	9.7	29.7	59	19.2	32.7	19.8	8	4.3
3-041	Pure β3.4-thalassemia trait	β3.4/βA	β 3.4 kb deletion	αα/αα	F	4.29	9.8	30	70	22.8	32.7	20.6	7.1	3.5
3-042	Pure β3.4-thalassemia trait	β3.4/βA	β 3.4 kb deletion	αα/αα	M	6.4	13.6	41.6	65	21.2	32.7	19.8	6.7	7.3
3-043	Pure β3.4-thalassemia trait	β3.4/βA	β 3.4 kb deletion	αα/αα	F	4.44	9	27.5	62	20.2	32.7	20.9	7.6	7.2
3-044	Pure β3.4-thalassemia trait	β3.4/βA	β 3.4 kb deletion	αα/αα	F	4.93	10.8	33	67	22	32.7	19.5	6.3	7.2
3-045	Pure β3.4-thalassemia trait	β3.4/βA	β 3.4 kb deletion	αα/αα	M	6.03	12.5	38	63	20.8	32.9	22.3	7.5	6.9
3-046	Pure β3.4-thalassemia trait	β3.4/βA	β 3.4 kb deletion	αα/αα	F	4.67	10.3	31.3	67	22	32.9	20.4	5.9	8.6
3-047	Pure β3.4-thalassemia trait	β3.4/βA	β 3.4 kb deletion	αα/αα	M	6.98	13.1	39.8	57	18.8	32.9	21.1	7.1	2.1
3-048	Pure β3.4-thalassemia trait	β3.4/βA	β 3.4 kb deletion	αα/αα	M	6.45	13.8	41.9	65	21.4	32.9	21.4	7	8.4
3-049	Pure β3.4-thalassemia trait	β3.4/βA	β 3.4 kb deletion	αα/αα	M	4.88	12.4	37.6	77	25.4	33	18.4	5.1	13.5
3-050	Pure β3.4-thalassemia trait	β3.4/βA	β 3.4 kb deletion	αα/αα	F	3.75	8.3	25.1	67	22.2	33.1	20.2	6.8	8.9
3-051	Pure β3.4-thalassemia trait	β3.4/βA	β 3.4 kb deletion	αα/αα	F	5.18	12.5	37.8	73	22.8	33.1	-	7.3	4.9
3-052	Pure β3.4-thalassemia trait	β3.4/βA	β 3.4 kb deletion	αα/αα	F	4.46	9.6	29	65	21.5	33.1	-	8.3	5.6
3-053	Pure β3.4-thalassemia trait	β3.4/βA	β 3.4 kb deletion	αα/αα	M	5.86	12.3	36.9	63	21	33.3	19.6	8.6	1
3-054	Pure β3.4-thalassemia trait	β3.4/βA	β 3.4 kb deletion	αα/αα	F	6.23	13.7	41.1	66	22	33.3	-	7.1	3.2
3-055	Pure β3.4-thalassemia trait	β3.4/βA	β 3.4 kb deletion	αα/αα	F	-	11	33	-	-	33.3	-	6.7	7.8
3-056	Pure β3.4-thalassemia trait	β3.4/βA	β 3.4 kb deletion	αα/αα	M	6.29	13.7	40.9	65	21.9	33.5	19.8	7.3	5.6
3-057	Pure β3.4-thalassemia trait	β3.4/βA	β 3.4 kb deletion	αα/αα	F	5.2	10.9	32.6	62.6	21	33.5	21.2	5.7	8.9
3-058	Pure β3.4-thalassemia trait	β3.4/βA	β 3.4 kb deletion	αα/αα	F	5.5	11.2	33	60	20.4	33.9	-	6.5	8.6
3-059	Pure β3.4-thalassemia trait	β3.4/βA	β 3.4 kb deletion	αα/αα	M	5.5	10.5	30.8	56	19.1	34.1	21.3	7.4	8.1
3-060	Pure β3.4-thalassemia trait	β3.4/βA	β 3.4 kb deletion	αα/αα	M	6.66	14.1	41.3	62	21.2	34.1	18.5	7.2	3.2
3-061	Pure β3.4-thalassemia trait	β3.4/βA	β 3.4 kb deletion	αα/αα	M	5.68	12.6	36.9	65	22.1	34.1	20.3	7	5.6
3-062	Pure β3.4-thalassemia trait	β3.4/βA	β 3.4 kb deletion	αα/αα	M	-	-	-	62.2	-	-	-	-	-
3-063	Pure β3.4-thalassemia trait	β3.4/βA	β 3.4 kb deletion	αα/αα	M	-	-	-	63	-	-	-	7.7	2.2
3-064	Pure β3.4-thalassemia trait	β3.4/βA	β 3.4 kb deletion	αα/αα	M	-	-	-	63	-	-	-	7.5	2
3-065	Pure β3.4-thalassemia trait	β3.4/βA	β 3.4 kb deletion	αα/αα	F	-	-	-	66.3	-	-	-	6.5	7.2
3-066	Pure β3.4-thalassemia trait	β3.4/βA	β 3.4 kb deletion	αα/αα	M	-	-	-	69	-	-	-	7.2	3.1
3-067	Pure β3.4-thalassemia trait	β3.4/βA	β 3.4 kb deletion	αα/αα	F	-	-	-	69	-	-	-	-	-
3-068	Pure β3.4-thalassemia trait	β3.4/βA	β 3.4 kb deletion	αα/αα	F	4.75	-	33	69.5	-	-	-	6.9	-
3-069	Pure β3.4-thalassemia trait	β3.4/βA	β 3.4 kb deletion	αα/αα	M	-	-	-	70	-	-	-	6.9	3.1
3-070	Pure β3.4-thalassemia trait	β3.4/βA	β 3.4 kb deletion	αα/αα	M	-	-	-	71	-	-	-	5.3	12.4
3-071	Pure β3.4-thalassemia trait	β3.4/βA	β 3.4 kb deletion	αα/αα	F	-	-	40	-	-	-	-	5.9	0.5
3-072	Pure β3.4-thalassemia trait	β3.4/βA	β 3.4 kb deletion	αα/αα	M	-	-	-	-	-	-	-	7.9	4.1
3-073	Pure β3.4-thalassemia trait	β3.4/βA	β 3.4 kb deletion	αα/αα	M	-	-	-	-	-	-	-	7.3	3.3
3-074	Pure β3.4-thalassemia trait	β3.4/βA	β 3.4 kb deletion	αα/αα	F	-	-	-	-	-	-	-	6.4	8.5
3-075	Pure β3.4-thalassemia trait	β3.4/βA	β 3.4 kb deletion	αα/αα	F	-	-	-	-	-	-	-	7.6	3.7
3-076	Pure β3.4-thalassemia trait	β3.4/βA	β 3.4 kb deletion	αα/αα	F	-	-	-	-	-	-	-	6.5	-
3-077	Pure β3.4-thalassemia trait	β3.4/βA	β 3.4 kb deletion	αα/αα	F	-	-	-	-	-	-	-	5.4	11
3-078	Pure β3.4-thalassemia trait	β3.4/βA	β 3.4 kb deletion	αα/αα	M	-	-	-	-	-	-	-	7.8	1.3
3-079	Pure β3.4-thalassemia trait	β3.4/βA	β 3.4 kb deletion	αα/αα	M	-	-	-	-	-	-	-	6.6	6.5
3-080	Pure β3.4-thalassemia trait	β3.4/βA	β 3.4 kb deletion	αα/αα	F	4.13	9.7	32.2	78	23.5	30.1	-	7.1	6.7
3-081	Pure β3.4-thalassemia trait	β3.4/βA	β 3.4 kb deletion	αα/αα	M	5.71	11.3	36	63	19.8	31.4	19	7.6	4.5
3-082	Pure β3.4-thalassemia trait	β3.4/βA	β 3.4 kb deletion	αα/αα	M	6.17	12.8	40.3	65.4	20.8	31.8	19.7	8.6	-
3-083	Pure β3.4-thalassemia trait	β3.4/βA	β 3.4 kb deletion	αα/αα	M	6.48	13.8	42.8	66	21.3	32.2	21.8	7.2	5.3
3-084	Pure β3.4-thalassemia trait	β3.4/βA	β 3.4 kb deletion	αα/αα	F	4.63	10.1	31	67	21.8	32.6	19.7	6.7	7.8
3-085	Pure β3.4-thalassemia trait	β3.4/βA	β 3.4 kb deletion	αα/αα	F	4.89	10.8	33	66.4	22.1	32.7	20.1	6.1	10.9
3-086	Pure β3.4-thalassemia trait	β3.4/βA	β 3.4 kb deletion	αα/αα	F	5.41	11.3	34	62.9	20.7	33.2	-	7.7	7.9
3-087	Pure β3.4-thalassemia trait	β3.4/βA	β 3.4 kb deletion	αα/αα	F	5.48	11.9	35.5	64.8	22.7	35	-	6.9	-
3-088	Pure β3.4-thalassemia trait	β3.4/βA	β 3.4 kb deletion	αα/αα	F	-	-	-	68	-	-	-	5.9	8.8
3-089	Pure β3.4-thalassemia trait	β3.4/βA	β 3.4 kb deletion	αα/αα	M	5.01	11.3	37.1	74	22.5	30.4	-	6.5	4.9
3-090	Pure β3.4-thalassemia trait	β3.4/βA	β 3.4 kb deletion	αα/αα	F	5.49	11.3	36.4	66.4	20.7	31.1	18.7	6.9	-
3-091	Pure β3.4-thalassemia trait	β3.4/βA	β 3.4 kb deletion	αα/αα	F	4.83	10.3	33	68.2	22.3	31.2	-	6.1	19
3-092	Pure β3.4-thalassemia trait	β3.4/βA	β 3.4 kb deletion	αα/αα	M	6.01	13.3	37.5	62.4	22.1	35.5	-	6.4	3.4
3-093	Pure β3.4-thalassemia trait	β3.4/βA	β 3.4 kb deletion	αα/αα	F	4.53	9.6	33.4	73.7	21.2	28.7	-	5.2	-
3-094	Pure β3.4-thalassemia trait	β3.4/βA	β 3.4 kb deletion	αα/αα	M	6.3	14.4	46.9	74.4	22.8	30.7	15.2	5.1	6.1
3-095	Pure β3.4-thalassemia trait	β3.4/βA	β 3.4 kb deletion	αα/αα	M	7.23	14.7	47	65	20	31	-	7.3	3.4
3-096	Pure β3.4-thalassemia trait	β3.4/βA	β 3.4 kb deletion	αα/αα	F	4.88	11.5	37	75	23.6	31.1	17.6	5.8	10.5
3-097	Pure β3.4-thalassemia trait	β3.4/βA	β 3.4 kb deletion	αα/αα	M	-	-	-	70.5	22	31.2	-	6.7	10.7
3-098	Pure β3.4-thalassemia trait	β3.4/βA	β 3.4 kb deletion	αα/αα	M	5.29	12.1	38.1	72	23	31.8	21.7	6.3	13.3
3-099	Pure β3.4-thalassemia trait	β3.4/βA	β 3.4 kb deletion	αα/αα	M	5.44	12.8	40	73.5	23.5	31.8	-	6	6.8
3-100	Pure β3.4-thalassemia trait	β3.4/βA	β 3.4 kb deletion	αα/αα	F	5	10.5	33	65.9	21.2	32.2	19.5	-	-
3-101	Pure β3.4-thalassemia trait	β3.4/βA	β 3.4 kb deletion	αα/αα	F	5.3	10.1	31	59.7	19.3	32.3	19.7	7.4	3.3
3-102	Pure β3.4-thalassemia trait	β3.4/βA	β 3.4 kb deletion	αα/αα	M	4.97	11.8	36.1	72.5	23.7	32.7	18.1	6.1	6.1
3-103	Pure β3.4-thalassemia trait	β3.4/βA	β 3.4 kb deletion	αα/αα	F	4.77	9.7	31	65	20.3	31.3	19.5	7.1	6.1
4-001	Pure βFil-thalassemia trait	βFil/βA	β 118 kb Filipino deletion	αα/αα	M	5.59	12	36.8	65.9	21.4	32.5	17.7	6.7	2
4-002	Pure βFil-thalassemia trait	βFil/βA	β 118 kb Filipino deletion	αα/αα	M	5.1	-	40	78.3	-	-	-	6.8	3.5
4-003	Pure βFil-thalassemia trait	βFil/βA	β 118 kb Filipino deletion	αα/αα	F	5.01	11.1	34.2	68.4	22.3	32.5	17.3	6.5	1.9
4-004	Pure βFil-thalassemia trait	βFil/βA	β 118 kb Filipino deletion	αα/αα	M	5.81	12.4	38.8	66.8	31.3	32	16.8	7.2	2
4-005	Pure βFil-thalassemia trait	βFil/βA	β 118 kb Filipino deletion	αα/αα	M	-	-	-	68.6	-	-	-	6.1	-
4-006	Pure βFil-thalassemia trait	βFil/βA	β 118 kb Filipino deletion	αα/αα	F	4.14	10.5	32.2	77.8	25.4	32.6	18	5.2	10.9
4-007	Pure βFil-thalassemia trait	βFil/βA	β 118 kb Filipino deletion	αα/αα	F	-	-	-	65.4	20.9	32	-	6.5	3
4-008	Pure βFil-thalassemia trait	βFil/βA	β 118 kb Filipino deletion	αα/αα	M	-	13.8	43.6	62.8	19.9	31.7	14.3	6.5	4.6
4-009	Pure βFil-thalassemia trait	βFil/βA	β 118 kb Filipino deletion	αα/αα	F	5.02	10.4	34.4	68.4	20.8	30.5	16.7	6	-
5-001	Pure β105-thalassemia trait	β105/βA	β 105 bp deletion	αα/αα	F	5.18	9.9	30.7	59.2	19.1	32.3	16.3	5	2.5
5-002	Pure β105-thalassemia trait	β105/βA	β 105 bp deletion	αα/αα	M	-	-	-	61.8	-	-	-	5.5	0.2
5-003	Pure β105-thalassemia trait	β105/βA	β 105 bp deletion	αα/αα	F	5.06	10.2	32	64	20.1	31.5	17.2	5.2	2.7
5-004	Pure β105-thalassemia trait	β105/βA	β 105 bp deletion	αα/αα	F	5.32	10.4	33	61	19.5	32	16.9	6.1	0.8
5-005	Pure β105-thalassemia trait	β105/βA	β 105 bp deletion	αα/αα	M	5.69	12.2	37.8	66.4	21.4	32.3	15	5.2	0.3
5-006	Pure β105-thalassemia trait	β105/βA	β 105 bp deletion	αα/αα	F	-	11	33.4	64	21	-	-	5.9	1.9
5-007	Pure β105-thalassemia trait	β105/βA	β 105 bp deletion	αα/αα	F	4.4	9.9	30.4	69.1	22.5	32.6	17.7	4.1	-
